# Supplementary material for: Research on the pathological features of BRCA-mutated breast cancer in Shenzhen, China: A single-center study
Source: Research Square preprint supplement (doi:10.21203/rs.3.rs-6834151/v1), 2025-07-09
Supplement: Supplementary file 1 [file 567394efee3cc4118621b8de.xlsx]

## Sheet: Sheet1
编号		基因突变情况													病理										治疗方案	肿瘤史		随访
编号	样本编号（Sample barcode/lab No）	基因（Gene）	NM号(Reference Sequence)	核苷酸改变(Nucleotide Change)	氨基酸改变(Amino acids Change)	突变类型(Mutation type, Interpretation)	出生日期	确诊年龄	性别	民族	籍贯	生育史	月经史	个人居住史	病理类型	免疫组化				分子类型	T	TNM分期	淋巴结情况	肿瘤分级		个人肿瘤史	家族肿瘤史
																ER	PR	Her-2	Ki-67
1	17B0014394	MUTYH		c.74G>A	p.Gly25Asp	意义未明突变	1958.04	59	女	汉	广东佛山	GXP1	绝经	深圳	IDC	0.9	0.85	1+	0.1	Luminal A	2.0cm	pT1N0M0，IA期	0/4	2	2017.1.10 左乳全切+SLNB TC*4 内分泌治疗	无	母亲 乳腺癌 表妹 乳腺癌	（失联）
		MUTYH		c.53C>T	p.Pro18Leu	意义未明突变
		MSH2		c.1301C>T	p.Ala434Val	意义未明突变
2	17B0014395	CHEK2		c.1111C>T	p.His371Tyr	疑似致病突变	1962.05	53	女	汉	广东潮安	GXP2	2015.09.12	深圳	IDC	—	0.05	—	0.2	Luminal B Her-2阴	3.5cm	pT2N0M0，IIA期	0/4	3	2015.9.9 左乳全切+SLNB ；FEC*4→T*4； 他莫昔芬*5年	无	无	2016.12.20纵膈及左腋窝多发增大淋巴结 肝内多发转移瘤
3	17B0014396	—	—	—	—	—	1985.01	31	女	汉	广东深圳	GXP1	2016.12.28	深圳	DCIS	—	—	3+	0.5	Her-2阳性型	1.3cm	pTisN0M0，0期	0	中级别	2017.2.6 左全切+SLNB+扩张器	2020.06.24 双侧甲状腺乳头状癌 pT1N1M0，IB期	无	无（2021.01.22）
4	17B0014738	ATM		c.5624G>A	p.Arg1875Gln	意义未明突变	1980.01	34	女	汉	广东汕头	GXP2	2016.05.01	深圳	DCIS	0.95	0.95	3+	0.3	LuminalB Her-2阳性型	1.2cm	pT1N0M0，IA期	0/5	中级别	2016.5.18 右乳全切+SLNB ddEC*4→PH*12 赫赛丁*1年 阿那曲唑→他莫昔芬	无	无	无（2021.01.22）
		ATM		c.8942A>G	p.His2981Arg	意义未明突变
		BRCA2		c.440A>G	p.Gln147Arg	意义未明突变
		MRE11A		c.1226_1228delGAG	p.Gly409del	意义未明突变
5	17B0014739	—	—	—	—	—	1974.03	42	女	汉	广东阳西	GXP2	2016.08.04	深圳	IDC	—	—	—	0.7	TNBC	3.0cm	cT2N0M0，IIA期；ypT1N0M0，IA期	0/3	3	2016.8.25 NAC:EC*4→P*12（qw）2017.1.18 右BCT+SLNB→CR 放疗 卡培他滨？	无	无	无（2019.05.21）
6	17B0014740	MRE11A		c.1842+4A>C		意义未明突变	1975.05	41	女	汉	湖北汉川	GXP2	2016.07.13	深圳	IDC	1% 1+	—	1+	0.25	LuminalB Her-2阴性型	1.7cm	pT1N0M0，IA期	0/4	3	2016.8.11 左BCT+SLNB+左全切 2016.9.1 ddEC*4→P*12	无	无	（失联）
		BRCA2		c.4076C>T	p.Thr1359Ile	意义未明突变
		MSH6		c.4001+2_+5delTAAC		意义未明突变
7	17B0014741	—	—	—	—	—	1982.03	35	女	汉	江西万载	GXP2	2016.10.25	深圳	DCIS	0.95	0.95	3+	0.3	LuminalB Her-2阳性型	1.2cm	pTisN0M0，0期	0/3	低级别	2016.12.02 右全切+SLNB	无	无	无（已联系病人）
8	17B0014742	MUTYH		c.74G>A	p.Gly25Asp	意义未明突变	1987.06	29	女	汉	广东普宁	GXP0	2016.12.03	深圳	IDC	0.9	0.8	—	0.1	Luminal A	1.1cm	cT2N1M0，IIA期	1/16	3	2016在港大NAC:EC *1 TAC*5 2017.2.21 右BCT+ALN 后续未知	无	无	（失联）
		MUTYH		c.53C>T	p.Pro18Leu	意义未明突变
		ATM		c.8987+3G>A		意义未明突变
		MSH6		c.1656T>A	p.His552Gln	意义未明突变
9	17B0014743	MSH6		c.3818A>G	p.Asn1273Ser	意义未明突变	1980.06	36	女	汉	吉林长春	GXPX	2017.01.25	深圳	IDC	0.4	0.3	3+	0.25	LuminalB Her-2阳性型	1.1cm	cT2N1-2M0，IIIB期	0/35	2	2017.3.16姑息化疗 TCbH*7 （qw）2017.10.16 左BCT+ALN 放疗*25 戈舍瑞林+他莫昔芬	2017.9.18 行肺楔形切除术 （左肺上叶肺硬化性肺泡细胞瘤）	无	无（已联系病人）
10	17B0014744	—	—	—	—	—	1981.06	34	女	汉	广东乐昌	GXP2	2016.01.23	深圳	IDC	0.9	0.9	—	0.15	Luminal A	1.5cm	pT1N0M0，IA期	0/3	2	2016.3.8左全切+SLNB ddEC*4	无	无	2021.4 左胸壁复发 行左胸壁肿物切除术
11	17B0014745	ATM		c.6101G>A	p.Arg2034Gln	意义未明突变	1981.01	35	女	汉	广东深圳	GXP2	2016.06.28	深圳	ILC	0.9	0.9	—	0.1	Luminal A	1.0cm	pT1N1M0，IIA期	1/13	1	2016.8.4 全切+ALN TC*4 放疗*27次 依西美坦*5年	无	无	无（已联系病人）
12	17B0015532	RAD51C		c.233C>T	p.Thr78Ile	意义未明突变	1966.07	50	女	汉	广东深圳	GXPX	2017.01.30	深圳	导管内乳头状癌	0.95	0.95	3+	0.3	LuminalB Her-2阳性型	1.2cm	pT1N0M0，IA期	0/5	高级别	2017.3.7 左乳全切	（双乳CA）2013年因右乳癌行右乳全切+SLNB 病理：DCIS	无	无（2021.04.08）
		MSH6		c.1063G>A	p.Gly355Ser	意义未明突变
13	17B0016491	MUTYH		c.934-2A>G	—	意义未明突变	1979.02	38	女	汉	广东深圳	GXP0	2017.02.09	深圳	IDC	0.8	0.7	1+	0.1	Luminal A	1.0cm	pT1N0M0，IA期	0/8	2	2017.3.20 BCT+SLNB；TC*4；放疗*32 他莫昔芬*5年	无	无	无（已联系病人）
14	17B0031751	STK11		c.920+6C>T	—	意义未明突变	1974.11	42	女	汉	广东深圳	GXP1	2017.02.28	深圳	IDC	0.9	0.9	—	0.05	Luminal A	1.0cm	pT1N1M0，IIA期	1/3	2	2017.3.16 右BCT+SLNB；TC*4 放疗*25 内分泌*5年	无	无	无（2020.08.09）
15	17B0031999	RAD51C		c.1109G>A	p.Arg370Gln	意义未明突变	1982.04	34	女	汉	广东新兴	GXP2	2017.02.28	深圳	IDC	0.9	0.9	—	0.05	Luminal A	0.7cm	pT1N1M0，IIA期	2/18	2	2017.4.10 右BCT+ALN；EC*4→T*4；放疗；内分泌治疗	无	无	无（2021.03.18）
16	17B0051500	CHEK2		c.1037G>T	p.Arg346Leu	意义未明突变	1973.01	43	女	汉	广东龙川	GXP1	2017.11.06	深圳	IDC	0.9	0.9	—	0.05	Luminal A	1.0cm	pT1N1M0，IIA期	1/3	2	2016外院行右全切+SLNB；TC*4 内分泌治疗	无	外婆乳腺癌	（失联）
17	17B0052713	ATM		c.3963G>A	p.Met1321Ile	意义未明突变	1964.02	53	女	汉	广东饶平	GXPX	已绝经	深圳	DCIS	—	—	3+	0.05	Her-2阳性型	0.12cm	pT1N0M0，IA期	0/4	中级别	2017.06.02 左全切+SLNB；PH*12（紫杉醇+卡铂）	35岁患右乳癌；42岁右乳癌复发	无	无（2020.09.21）
18	17B0052999	—	—	—	—	—	1968.08	46	女	汉	广东深圳	GXP0	2017.03,30	深圳	IDC	—	—	—	0.1	TNBC	1.5cm	pT1N0M0，IA期	0/4	3	2017.5.18 右BCT+SLNB；TC*4；放疗*25次	2015年左乳癌 DCIS	父亲肺癌（去世）	（失联）
19	17B0076236	—	—	—	—	—	1970.02	45	女	汉	广东河源	GXPX	2015.10.08	深圳	IDC	0.8	0.9	—	0.4	LuminalB Her-2阴性型	2cm	pT1N1M0，IIA期	1/11	2	2015.11.6右MRM FEC*3→T*3 放疗*28次 内分泌治疗	无	奶奶肺癌	无（2021.04.22）
20	17B0087287	CHEK2		c.445-9C>G		意义未明突变	1991.03	26	女	汉	广东深圳	GXP0	2017.05.22	深圳	DCIS	0.4	0.3	—	0.02	Luminal A	1.1cm	pTisN0M0，0期	0/2	低级别	2017.06.22 左BCT	无	无	无（2021.03.22）
21	17B0130927	—	—	—	—	—	1985.09	31	女	汉	广东龙川	GXP0	2017.03.22	深圳	IDC	0.8	0.8	—	0.1	Luminal A	1.0cm	pT1N0M0，IA期	0/4	1	2017.4.5 右全切+SLNB；TC*4；他莫昔芬*5年	无	外公肝癌	无（2020.03.09）
22	17B0130928	—	—	—	—	—	1980.04	36	女	汉	广东河源	GXP1	2017.04.09	深圳	IDC	0.99	0.99	1+	0.15	Luminal A	1.0cm	pT1N0M0，IA期	0/7	2	2017.4.19 左BCT+SLNB；TC*4；放疗*27次 他莫昔芬*5年	无	父亲肝癌（去世）	无（2020.09.14）
23	17B0130929	PMS1		c.1352C>T	p.Thr451Met	意义未明突变	1979.08	37	女	汉	广东深圳	GXP1	2017.03.21	深圳	IDC	0.6	0.8	—	0.1	Luminal A	1.2cm	pT1N0M0，IA期	0/5	3	2017.4.13 左BCT+SLNB；TC*4；内分泌治疗	无	无	无（2021.02.24）
24	17B0130930	PALB2		c.3225T>	p.Ser1075Arg	意义未明突变	1996.07	21	女	汉	广东深圳	GXP0	2017.07.28	深圳	IDC	0.6	0.3	—	0.15	Luminal A	3cm	pT2N0M0，IIA期	0/4	2	2017.09.06 右全切+SLNB；EC*4→P*4 （q2w）戈舍瑞林+他莫昔芬	无	姑姑白血病；外祖父肺癌	无（2020.03.08）
25	17B0130931	BARD1		c.2191C>T	p.Arg731Cys	意义未明突变	1986.12	29	女	汉	广东惠东	GXP2	2016.08.20	深圳	IDC	0.8	0.7	—	0.05	Luminal A	2.1cm	pT2N1M0，IIB期	1/18	3	2016.9.23 右BCT+ALN；后续治疗不详	无	无	无（2021.04.13）
26	17B0130932	BRCA2		c.164A>G	p.Asn55Ser	意义未明突变	1980.03	37	女	汉	河南商丘	GXP1	2017.02.28	深圳	IDC	0.8	0.95	—	0.05	Luminal A	3.0cm	pT2N0M0，IIA期	0/6	2	2017.3.30 右BCT+SLNB；TC*4；放疗*25次；内分泌治疗	无	无	无（2020.10.23）
27	18B0013691	CHEK2	c.417C>A	p.Tyr139Ter	Nonsense	已知致病突变	1971.05	46	女	汉	辽宁大连	GXPX	2017.06.20	深圳	ILC	0.95	0.95	—	0.15	Luminal A	6.5cm	cT3NXM0，III期；ypT2N3M0 IIIC期	26/27	2	2017.08 NAC:EC→T ；2017.12.21 MRM ；2018.1.31 预防性切除双侧附件；未放疗；内分泌治疗	无	无	无（2021.02.03）
28	18B0014277	—	—	—	—	—	1983.11	33	女	汉	湖北十堰	GXP1	2017.09.27	深圳	IDC	—	0.4	1+	0.6	Luminal B Her-2阴	1.2cm	ypCR	0/6	3	NAC;ddEC*4→P*4 q2w；2018.2.12 右BCT+SLNB；放疗；内分泌治疗	无	姐姐53岁乳腺癌	无（2021.07.15）
29	18B0014570	—	—	—	—	—	1989.06	28	女	汉	湖北攸县	GXP1	2017.05.03	深圳	IDC	0.6	0.6	1+	0.4	Luminal B Her-2阴	cT3.5cm	cT2N0M0，IIA；ypT2N0M0，IIA	0/5	3	2017.06.16 NAC:EC*4→T*4；右BCT+SLNB；放疗；OFS+托瑞米芬（阿那曲唑+戈舍瑞林）	无	无	无（2021.07.19）
30	18B3190557	ATM	c.9036_9038delACT	p.Leu3013del	Deletion	意义未明突变	1981.05	36	女	汉	宁夏银川	GXP0	2017.07.24	深圳	IDC	0.85	0.85	—	0.3	Luminal B Her-2阴	2.0cm	pT1N1M0，IIA	1/13	3	2017.8.10 右全切+ALN；EC*4→T*4；内分泌治疗；放疗	无	外公胆囊癌（去世）	无（2020.07.18）
31	18B3190875	—	—	—	—	—	1981.04	36	女	汉	广东汕尾	GXP1	2017.03.24	深圳	IDC	—	—	—	0.5	TNBC	4cm	ypT2N0M0，IIA	0/5	3	2017.04.13 NAC;ddEC*4→P*4 q2w；2017.8.31 右BCT+SLNB；放疗；卡培他滨？	2014左侧附件畸胎瘤	无	无（2021.05.04）
32	18B3203664	BRCA1	c.5200T>C	p.Phe1734Leu	Missense	意义未明突变	1973.1	44	女	汉	江西九江	GXP1	2018.03.05	深圳	IDC	0.7	0.7	—	0.35	Luminal B Her-2阴	3cm	pT2N0M0，IIA	0/28	3	2018.03.20 右BCT+ALN；EC*4→T*4；内分泌治疗	无	外婆乳腺癌	无（2021.03.24）
		MSH6	c.1063G>A	p.Gly355Se	Missense	意义未明突变
		PMS1	c.2755C>T	p.Arg919Cys	Missense	意义未明突变
33	18B3203666	—	—	—	—	—	1989.07	28	女	汉	福建莆田	G3P1	2018.02.21	深圳	IDC	0.2	0.1	3+	0.3	Luminal B Her-2阳	2cm	pT1cN1minM0，IB	微转移1/5	2	2018.3.13 左保乳+SLNB：EC*4→TH*4；放疗；靶向*1年；内分泌*5年	无	无	无（2021.06.17）
34	18B4027019	BRCA2	c.7772A>G	p.Asn2591Ser	Missense	意义未明突变	1979.08	37	女	汉	广东韶关	GXP2	2017.04.28	深圳	IDC	0.95	0.8	—	0.2	Luminal B Her-2阴	2.5cm	pT2N2M0，IIIA期	5/17 胸肌间2/2	2	2017.5.26 左MRM；EC*4→T*4；放疗；内分泌治疗	无	姑姑乳腺癌	无（2021.04.25）
		BRCA2	c.7805+3A>C		Splice	意义未明突变
35	18B4065818	ATM	c.6006+8T>C	—	Splice	意义未明突变	1986.07	32	女	汉	广东深圳	GXPX	2018.04.24	深圳	IDC	0.7	0.5	—	0.2	Luminal B Her-2阴	1cm	cT2N2M0，IIIA；ypT1N1M0，IIA	1/11+2/8	2	NAC:EC*4→T*4；2019.1.4 左BCT+ALN；放疗；内分泌；卡培他滨？	无	无	无（2020.12.08）
36	18B4065819	—	—	—	—	—	1979.04	39	女	汉	安徽合肥	GXP1	2018.08,24	深圳	DCIS	0.8	0.8	—	0.05	Luminal A	1.5cm	TisN0M0，0期	0	低级别	2018.9.4 右BCT；放疗*15次；内分泌*5年	无	母亲乳腺癌	无（2019.07.17）
37	18B4065820	BRCA1	EX18_19 DUP	—	Duplication	意义未明突变	1984.09	33	女	汉	江西九江	GXP2	2018.08.25	深圳	左IDC	—	0.01	—	0.8	TNBC	1.2cm	pT1N0M0，IA	0/7	3	2018.7.27行左全切+SLNB；AC*4→PTX*12	2009 右乳癌 行右MRM（IDC）FEC*6	母亲、姨妈乳腺癌病逝；表姐乳腺癌	无（2020.04.17）
															右IDC	—	—	—	0.8	TNBC			0		2009年与外院行右MRM
38	18B4083071	—	—	—	—	—	1977.12	40	女	汉	湖南浏阳	GXPX	2018.08.26	深圳	IDC	0.8	0.8	3+	0.15	Luminal B Her-2阳	2.5cm	cT2N1M0 IIB	1/26	3	2018.9.3 NAC:TEC*2→EC*2→TH*4 拒绝手术	无	无	未手术，2019.1.3复查可见癌灶，未明显转移
39	18B4140007	—	—	—	—	—	1974.09	40	女	汉	广东电白	GXP1	2015.05.12	深圳	ILC	0.8	0.15	—	0.1	Luminal B Her-2阴	1.8cm	pT1N0M0，IA	0/4	3	2015.05.29 左BCT+SLNB：TC*4；放疗*28次 内分泌*5年	无	无	无（202007.15）
40	18B4144418	ATM	c.6503C>T	p.Ser2168Leu	Missense	意义未明突变	1974.01	44	女	汉	广东惠州	GXP1	2018.10.15	深圳	IDC	0.9	0.9	—	0.05	Luminal A	0.9cm	pT1N0M0，IA	0/8	2	2018.11.7 右全切+SLNB；TC*4；内分泌*5年	无	无	无（2020.05.20）
		STK11	c.1135C>A	p.His379Asn	Missense	意义未明突变
41	18B4144803	BRCA2	c.475+2T>C	—	Splice	疑似致病突变	1980.01	38	女	汉	湖北武汉	G1P1	2014（OFS）	深圳	右IDC	0.8	—	—	0.2	Luminal B Her-2阴	1.5cm	pT1N1minM0，IB	微转移1/3	3	2018.11.13 右全切+SLNB；EC*4→T*12；放疗；他莫昔芬+戈舍瑞林；2019.12.3 双侧附件预防性切除	2013 左乳CA行MRM IDC 5/23;	无	无（2021.07.04）
															左IDC	+	1+	3+	不详				5/23	3	2013年外院行左MRM
42	18B4154156	RAD50	c.3790C>T	p.Leu1264Phe	Missense	意义未明突变	1977.12	40	女	汉	湖北江安	GXP1	2018.07.14	深圳	IDC	0.05	0.02	1+	0.4	Luminal B Her-2阴	5.5cm	cT3N1M0	0/16	2	NAC:TAC*6；2018.11.13 左MRM；卡培他滨？内分泌治疗	无	无	无（2020.12.09）
43	18B4154358	BRCA2	c.3521G>C	p.Gly1174Ala	Missense	意义未明突变	1981.03	37	女	汉	河南郑州	GXP1	2018.10.22	深圳	IDC	0.9	0.9	—	0.1	Luminal A	1.6cm	pT1N0M0，IA	0/4	2	2018.11.14 左全切+SLNB；TC*4；内分泌治疗	无	无	无（2021.06.23）
44	18B4154359	BRCA2	c.8951C>G	p.Ser2984Ter	Nonsense	已知致病突变	1971.05	47	女	汉	江西南昌	GXP1	2018.10.02	深圳	IDC	—	—	—	0.3	TNBC	1.5cm	pT1N0M0，IA	0/7	3	2018.11.16 右全切+SLNB；EC*4→T*4	2018.12.18 胸前红斑切除 术后：浅表型基底细胞癌	妈妈、小姨、姐姐均为乳腺癌（姐姐45岁发病 测基因BRCA2致病突变）	无（2021.08.10）
45	18B4154360	MUTYH	c.715G>A	p.Val239Ile	Missense	意义未明突变	1984.11	34	女	汉	广东揭阳	GXPX	2018.10.13	深圳	IDC	0.9	0.9	—	0.15	Luminal A	1.5cm	pT1N0M0，IA	0/4	2	2018.11.14左BCT+SLNB；TC*4；内分泌	无	无	无（2021.04.14）
		PALB2	c.2474G>C	p.Arg825Th	Missense	意义未明突变
		PMS1	c.1162A>C	p.Ile388Leu	Missense	意义未明突变
46	18B4159505	BRCA2	c.3109C>T	p.Gln1037Ter	Nonsense	已知致病突变	1974.12	43	女	汉	湖北赤壁	G1P0	2018.06.25	深圳	IDC	—	—	—	0.6	TNBC	2cm	pT1N0M0，IA	0/5	3	2018.7.16 左BCT+SLNB；EC*4→T*4；放疗*20次；预防性切除双侧附件	无	妹妹乳腺癌	无（2021.04.21）
47	18B4159506	MSH2	c.2516A>G	p.His839Arg	Missense	意义未明突变	1974.01	43	女	汉	广东潮阳	GXP0	2017.09.30	深圳	IDC	—	—	—	0.7	TNBC	2cm	ypCR	0/28	3	ddEC*4→P*12；2017.12.05 左BCT+SLNB；放疗	无	无	无（2021.06.22）
		RAD50	c.2657A>C	p.Gln886Pro	Missense	意义未明突变
48	18B4159507	BRCA2	c.8092G>A	p.Ala2698Thr	Missense	意义未明突变	1989.03	29	女	汉	四川广元	GXP1	2018.11.29	深圳	IDC	0.7	0.6	1+	0.35	Luminal B Her-2阴	2.5cm	pT2N2M0，IIIA期	6/26	3	2018.12.14 右MRM；ddEC*4→T*12；放疗*27次；内分泌*5年	无	无	2019胸壁肿物怀疑转移（B超发现）未处理
49	19B3187775	MRE11A	c.1724G>A	p.Gly575Asp	Missense	意义未明突变	1976.12	42	女	汉	广东梅州	GXP1	2019.02.08	深圳	左DCIS	0.9	90%%	—	0.05	Luminal A	1.7cm	pTisN0M0，IA	0/4	低级别	2019.3.1、2019.3.12 行左/右全切+SLNB+扩张器	无	无	无（2021.07.28）
															右DCIS	0.9	0.9	—	0.05	Luminal A	1.5cm	pTisN0M0，IA	0/4	低级别
50	19B3002255	SMARCA4	c.5007+5G>A	—	splice	意义未明突变	1977.09	40	女	汉	湖北襄樊	GXP2	2017.12.15	深圳	IDC	0.9	0.6	—	0.1	Luminal A	2.4cm	pT2N1M0，IIB	3/17	2	2018.1.15 右全切+SLNB+ALN；EC*4→T*4；放疗；内分泌治疗	无	父亲胃癌	无（2021.06.08）
51	19B3187771	—	—	—	—	—	1979.09	40	女	汉	陕西咸阳	GXP1	2019.10.31	深圳	DCIS	0.8	0.8	—	0.1	Luminal A	1.5cm	pTisN0M0，0期	0/4	低级别	2019.11.7 左BCT+SLNB；放疗	无	无	未知
52	19B3187764	—	—	—	—	—	1989.04	29	女	汉	广东深圳	G2P0	2017.10.13	深圳	IDC	1	—	3+	0.6	Luminal B Her-2阳性型	5.5cm	ypT3N3M0，IIIC期	24/24	3	NAC:TCbH*8；2019.1.16 右MRM；赫赛丁+长春新滨+拉帕替尼；内分泌：依维莫司	无	外婆胃癌 50岁	2019.7肝转移 腹腔多发转移 2020.1.16死亡
53	19B3187769	BRIP1	c.2324A>G	p.Asn775Ser	Missense	意义未明突变	1974.09	43	女	汉	广东韶关	GXP1	2017.11.14	深圳	IDC	—	—	—	0.6	TNBC	0.8cm	pT1N0M0，IA	0/5	3	2017.12.27 右全切+SLNB；EC*4→T*4	无	姐姐19岁脑髓体瘤	无（2021.04.21）
		PMS2	c.962T>C	p.Val321Ala	Missense	意义未明突变
		MUTYH	c.74G>A	p.Gly25Asp	Missense	意义未明突变
54	19B3187770	RAD51D	c.757C>T	p.Arg253*	Nonsense	已知致病突变	1974.07	43	女	汉	江西修水	GXPX	2017.10.23	深圳	IDC	0.5	0.2	—	0.6	Luminal B Her-2阴性型	7cm	pT3N2M0，IIIA	5/34	3	2017.11.24 右MRM；EC*4→T*4；放疗*25次；内分泌治疗	无	叔叔50岁食管癌	无（2021.08.01）
55	19B3187768	—	—	—	—	—	1975.03	44	女	汉	辽宁丹东	GXP0	绝经	深圳	DCIS	0.9	0.7	—	0.1	Luminal A	1.5cm	pTisN0M0，0期	0	低级别	行穿刺后转外院 行右侧全切+假体	2014年左乳癌 后内分泌治疗	姨妈51岁乳腺癌	无（2021.04.21）
56	19B3187767	BRCA1	c.5511G>C	p.Trp1837Cys	Missense	疑似致病突变	1986.01	33	女	汉	四川成都	G0P0	2019.11.08	深圳	IDC	0.95	0.7	1+	0.1	Luminal A	0.7cm	pT1N0M0，IA	0/1	1	2019.12.02 全切+SLNB；术后行21基因检测未化疗；内分泌治疗	无	妈妈33岁乳腺癌	无（2021.05.21）
		BRCA2	c.1454delinsTGT ATT	p.Lys485Metf s*26	Frameshift	疑似致病突变
57	19B3002256	BRCA1	c.212G>A	p.Arg71Lys	Missense	已知致病突变	1988.07	31	女	汉	浙江杭州	GXPX	2019.11.20	深圳	IDC	—	0.05	—	0.7	Luminal B Her-2阴性型	1.5cm	pT1N1M0，IIA	1/19	3	2019.12.30 左MRM；ddEC*4→T*4；内分泌：他莫昔芬	无	姑姑31岁乳腺癌	无（2021.08.18）
		BRCA2	c.7409_7410insT	p.Thr2471His fs*4	Frameshift	已知致病突变
58	19B3002257	BRCA2	c.2870del	p.Asn957Ilefs *3	Frameshift	已知致病突变	1972.12	46	女	汉	广东阳江	GXP2	2019.09.16	深圳	IDC	0.8	0.8	1+	0.25	Luminal B Her-2阴性型	4.5cm	pT2N0M0，IIA	0/4	3	2019.12.2 左乳全切+SLNB；TC*4；内分泌治疗	无	姐姐46岁乳腺癌	无（2021.07.28）
59	19B3187766	PMS1	c.287C>G	p.Ala96Gly	Missense	意义未明突变	1975.11	43	女	汉	安徽宿州	GXPX	2019.06.09	深圳	IDC	0.8	0.8	3+	0.2	Luminal B Her-2阳性型	1.0cm	pT1N0M0，IA	0/4	2	2019.7.3 右BCT+SLNB TCH*6；靶向治疗（H）一年	无	姨妈60岁乳腺癌	无（2021.07.23）
		SMARCA4	c.602A>T	p.Gln201Leu	Missense	意义未明突变
60	19B3002258	CHEK2	c.538C>T	p.Arg180Cys	Missense	意义未明突变	1985.11	34	女	汉	湖南常德	GXP2	2019.10.10	深圳	IDC	0.9	0.4	1+	0.3	Luminal B Her-2阳性型	1.5cm	pT1N0M0，IA	0/3	2	2019.11.12 左BCT+SLNB；AC*4；内分泌治疗	无	无	无（2021.06.21）
61	19B3187761	—	—	—	—	—	1981.08	37	女	汉	河北保定	GXPX	2018.08.07	深圳	DCIS	—	—	3+	0.15	Her-2 阳性型	4cm	pTisN0M0，0期	0/3	高级别	2018.8.15 左全切+SLNB 术后未化疗	无	无	2020.1.14 左腋窝淋巴结肿大 术后2/13+0/2+0/1 TCbHP*6 放疗25次 靶向治疗*1年 无其他转移（2020.12.08）
62	19B0102112	—	—	—	—	—	1977.08	40	女	汉	广东汕头	GXPX	2018.07.13	深圳	DCIS	0.9	0.9	1+	0.2	Luminal B Her-2阴性型	1.5cm	pTisN0M0，0期	0/2	中级别	2018.7.25 右全切+SLNB；托瑞米芬	无	无	无（2021.02.18）
63	19B0103111	CHEK2	c.917G>C	p.Gly306Ala	Missense	疑似致病突变	1985.04	33	女	汉	黑龙江大庆	GXP0	2018.10.06	深圳	IDC	0.9	0.4	—	0.15	Luminal A	3.5cm	cT2N1M0，IIB；ypT2N0M0，IIA	0/15	2	NAC:EC*4→T*4；2019.5.28 右MRM；阿那曲唑+亮丙瑞林；卡培他滨？	无	无	2021.6右侧卵巢癌 病理提示乳腺癌转移；盆腔广泛转移
		MSH6	c.3689C>G	p.Ala1230Gly	Missense	意义未明突变
		NF1	c.587-15T>C	-	Splice	意义未明突变
64	19B0103262	—	—	—	—	—	1971.09	47	女	汉	广东揭阳	GXP1	2018.11.03	深圳	DCIS	0.9	0.9	—	0.15	Luminal A	2.3cm	pTisN0M0，0期	0/4	中级别	2018.12.12 左乳全切+SLNB；他莫昔芬*5年	无	母亲48岁宫颈癌	无（2020.12.16）
65	19B0103263	—	—	—	—	—	1970.07	47	女	汉	广东海丰	GXP2	2018.06.10	深圳	左IDC	0.6	0.3	3+	0.3	Luminal B Her-2阳性型	ypT1.1cm	左ypT1N1M0，IIA；右ypTisN0M0，0期	左2/27+1/3	2	NAC;TCbH*6 qw；H*1年；2018.11.13左MRM+右全切+SLNB；放疗；内分泌治疗	无	无	无（2021.07.27）
															右DCIS	0.8	0.8	—	0.02	Luminal B	3cm	TisN0M0	0/4	低级别
66	19B0103264	—	—	—	—	—	1975.08	42	女	汉	广东深圳	G2P1	2018.03.08	深圳	IDC	—	—	—	0.3	TNBC	3cm	pT2N0M0，IIA	0/9	3	2018.3.23 左全切+SLNB；EC*4→T*4	无	母亲胆管癌（去世）；哥哥鼻咽癌；姐1：右肺癌+肾癌；姐2：肺癌	2020.9.25 穿刺发现胸壁转移；骨转移 cIV 期
67	19B0103824	BARD1	c.73G>C	p.Ala25Pro	Missense	意义未明突变	1973,07	44	女	汉	广东深圳	GXP2	2018.03.03	深圳	IDC	—	—	3+	0.25	Her-2阳性型	3.5cm	pT2N1M0，IIB	1/34	3	2018.3.27 左MRM；EC*4→PH*12；靶向治疗1年；放疗	2017.1.9 垂体7泌乳素瘤 溴隐亭治疗	无	无（2019.09.06）
		NF1	c.3114-16C>T		Splice	意义未明突变
68	19B0104241	ATM	c.5762+3A>G	-	Splice	意义未明突变	1966.04	52	女	汉	河北黄石	GXP0	2019.01.28	深圳	IDC	—	—	—	0.7	TNBC	2.5cm	cT2N0M0，IIA；ypT0M0N0，0期	0/5	3	NAC:ddEC*4→T*4；2019.7.2 左BCT+SLNB	无	父亲69岁胰腺癌	无（2021.08.09）
69	19B0104331	—	—	—	—	—	1974.12	41	女	汉	辽宁锦州	GXP1	2016.04.08	深圳	浸润性微乳头癌	0.8	0.7	3+	0.2	Luminal B Her-2阳性型	2.5cm	pT2N1M0，IIB	2/17	3	2016.5.18 左全切+SLNB；EC*4→TH*4；内分泌；放疗	2019.4.15 右乳癌 行右全切+SLNB，IDC，pT1N0M0，IA，术后行EC*4→T*4；托瑞米芬+戈舍瑞林	无	无（2021.03.13）
70	19B0104361	BRCA2	c.3109C>T	p.Gln1037*	Nonsense	已知致病突变	1979.04	39	女	汉	广东广州	GXP1	2019.03.23	深圳	双IDC	右90%	0.3	—	0.2	Luminal B Her-2阴性型	2.0cm	右pT1N2M0，IIIA	4/14	2	2019.4.22行双乳切+右改良+左SLNB；EC*4→T*4；放疗；戈舍瑞林+阿那曲唑	双乳癌	母亲52岁乳腺癌	无（2019.07.10）
																左90%	0.05	—	0.2	Luminal B Her-2阴性型	1.0cm	左pT1N0M0，IA	0/5	2
71	19B0106013	—	—	—	—	—	1989.09	29	女	汉	福建厦门	GXP0	2018.12.25	深圳	IDC	0.9	0.9	0	0.4	Luminal B Her-2阴性型	2.0cm	pT1N2M0，IIIA	7/24	2	2019.1.4 右全切+SLNB；EC*4→T*12；放疗；依西美坦+戈舍瑞林	无	无	无（2021.06.04）
72	19B0199258	TP53	c.1136G>T	p.Arg379Leu	Missense	意义未明突变	1973.05	45	女	汉	广东深圳	G0P0	2018.11.16	深圳	IDC	0.1	—	3+	0.6	Luminal B Her-2阳性型	2.1cm	cT2N0M0，IIA；ypT1N0M0，IA	0/8	3	NAC:TCbH*6;2019.04.26 右BCT+SLNB；放疗28次	无	无	无（2021.07.14）
73	19B0199597	—	—	—	—	—	1957.06	60	女	汉	广东河源	GXPX	55岁绝经	深圳	IDC	—	—	—	0.25	TNBC	0.5cm	pT1N0M0，IA	0/6	2	2019.3.5 左全切+SLNB；TC*4	无	母亲68岁胰腺癌	无（2020.05.30）
74	19B0224510	—	—	—	—	—	1979.02	39	女	汉	湖南常德	GXP2	2018.10.12	深圳	IDC	—	—	—	0.7	TNBC	2.3cm	cT2N1M0，IIB；ypTxN0M0	0/12	3	NAC;ddEC*4→T*12；2019.4.23 右BCT+SLNB；放疗28次	无	姑妈74岁胃癌	无（2021.06.22）
75	19B0227821	ATM	c.6785C>G	p.Ala2262Gly	Missense	意义未明突变	1971.12	47	女	汉	广东深圳	GXP2	2018.05.22	深圳	IDC	—	0.01	—	0.4	Luminal B Her-2阴性型	1.5cm	pT1N0M0，IA	0/4	2	2019.4.15 右保乳+SLNB；TC*6；放疗	无	无	2020.10.06 CT提示脑转移瘤 未进一步治疗
76	19B0280703	BRCA2	c.9690A>T	p.Leu3230Phe	Missense	意义未明突变	1971.12	46	女	汉	四川三台	GXPX	40岁绝经	深圳	IDC	—	—	—	0.9	TNBC	1.1cm	pT1N1M0，IIA	1/20	3	外院 2017.8.2 右保乳+ALN；EC*4→T*4；放疗25次	无	无	无（2019.01.22）
77	19B0280704	MSH6	c.3762A>	p.Glu1254Asp	Missense	意义未明突变	1967.04	49	女	汉	湖北武汉	GXP1	47岁绝经	深圳	IDC	—	—	—	0.4	TNBC	ypT2.5cm	cT2N0M0,IIA；ypT2N0M0，IIA	0/6	2	NAC:ddEC*4→T*4；2019.6.4 右BCT+SLNB；卡培他滨？	无	无	无（2021.04.17）
78	19B0281832	RAD50	c.3790C>T	p.Leu1264Phe	Missense	意义未明突变	1972.11	41	女	汉	广东深圳	GXPX	未知	深圳	IDC	0.9	0.8	—	0.15	Luminal A	6.5cm	pT4N0M0，IIIB	0/3	2	外院 NAC;EC*4；2013.7 左全切+SLNB；术后P*4；我院CIK治疗*10	无	爷爷80岁肝胆癌；奶奶91岁胰腺癌；外婆79岁直肠癌	未知
		RAD51C	c.845T>C	p.Leu282Ser	Missense	意义未明突变
79	19B0333160	—	—	—	—	—	1973.06	40	女	汉	福建泉州	GXP3	40岁绝经	深圳	IDC	0.9	0.3	—	0.2	Luminal B Her-2阴性型	2.0cm	pT1N0M0，IA	0/4	2	外院 2013年行右BCT+SLNB；FEC*6；放疗	无	无	未知
80	19B0336626	—	—	—	—	—	1967.11	49	女	汉	重庆	GXP1	2016.12.25	深圳	IDC	—	—	—	0.3	TNBC	1.2cm	pT1N0M0，IA	0/1	2	2017.1.11 右BCT+SLNB；EC*4→T*4；放疗*27次	2020.1 胃间质瘤手术	无	无（2021.03.21）
81	19B0336627	PMS1	c.419-17C>G		Splice	意义未明突变	1981.12	37	女	汉	广东阳山	GXP2	2019.01.12	深圳	IDC	0.9	0.3	3+	0.5	Luminal B Her-2阳性型	3.5cm	CT2N3M0，IIIC；ypT1N1M0，IIA	3/19+0/2	2	NAC;ddEC*4→THP*8；2019.8.29 左MRM；1年双靶；放疗；OFS+AI	无	无	无（2021.06.23）
82	19B3187760	PMS2	c.1354G>C	p.Gly452Arg	Missense	意义未明突变	1961.04	58	女	汉	广东深圳	GXPX	50岁绝经	深圳	左浸润性乳头癌	0.9	0.9	—	0.05	Luminal A	2.5cm	pT2N0M0；IIA	0/4	1	2019.12.26 左BCT+SLNB；TC*4；放疗；内分泌	2005右乳癌行MRM，T3N2M0；FEC*5(未完成）	无	无（2021.06.06）
83	19B3187758	STK11	c.*16+16G>C	—	Splice	意义未明突变	1990.12	28	女	汉	江西赣州	G2P1	2019.07.15	深圳	IDC	0.3	0.8	3+	0.3	Luminal B Her-2阳性	2.4cm	cT2N1M0，IIB；ypTisN0M0，0期	0/20	3	NAC;TCbHP*6；2019.12.15 左MRM；靶向PH*1年；戈舍瑞林+阿那曲唑	无	无	无（2021.05.14）
84	19B3187757	—	—	—	—	—	1955.07	64	女	汉	广东深圳	GXPX	49岁绝经	深圳	DCIS	0.9	0.9	—	0.05	Luminal A	0.6cm	TisN0M0，0期	0/4	低级别	2019.12.27 右全切+SLNB；依西美坦*5年	无	母亲44岁乳腺癌	无（2021.06.23）
85	19B3187755	BRCA2	c.5771_5774delT TCA	p.Ile1924Argf s*38	Frameshift	已知致病突变	1964.08	55	女	汉	浙江	GXPX	50岁绝经	深圳	IDC	0.8	0.1	—	0.3	Luminal B Her-2阴性	1.7cm	pT1N1M0，IIA	2/4	2	2019.12.19 左BCT+SLNB；EC*4→T*4；2020.11.17 预防性全子宫切除+双侧附件切除；放疗；内分泌治疗	无	母亲38岁乳腺癌去世；小姨70岁乳腺癌	无（2021.07.22）
86	19B3002259	—	—	—	—	—	1970.01	46	女	汉	湖北黄冈	GXP1	2018.11.09	深圳	IDC	—	—	—	0.5	TNBC	yp0.7cm	cT2N0M0，IIA；ypT1N0M0，IA	0/3	3	NAC;EC*4→T*4；2019.4.16 左BCT+SLNB；放疗；卡培他滨	无	无	无（2021.07.02）
87	19B3187756	BRCA1	c.5239C>T	p.Gln1747*	Nonsense	已知致病突变	1970.08	49	女	汉	湖北武汉	GXP1	2019.09.15	深圳	右IDC	—	—	—	0.7	TNBC	1.5cm	pT1N0M0，IA	0/3	3	2019.12.26 右BCT+SLNB；TCb*4；2020.5.28 预防性右侧全切	2012.左乳癌行MRM，T1.5cm，1/15；ET*1→3EC→T*4	姐姐乳腺癌；母亲肝癌；父亲肺癌	无（2020.05.27）
															左IDC	—	0.02	—	未知	Luminal B	1.0cm	pT1N1M0，IIA	1/15	3
88	19B3002260	—	—	—	—	—	1983.03	33	女	汉	湖北武汉	GXPX	2016.05.04	深圳	IDC	0.6	0.7	3+	0.2	Luminal B Her-2阳性	3.2cm	pT2N1M0，IIB	未知	3	2016.3.29 外院行左MRM；EC*4→TH*4；PH*1年；戈舍瑞林+他莫昔芬*10年	无	外公前列腺癌	无（2021.02.24）
89	19B3187912	—	—	—	—	—	1971.09	48	女	汉	湖北益阳	G2P2	2019.10.05	深圳	IDC	—	—	—	0.7	TNBC	2.5cm	pT2N0M0；IIA	0/4	3	2019.10.30 左BCT+SLNB；ddEC*4→P*4；	无	父亲肺癌	无（2020.05.12）
90	19B3187913	BRCA2	c.3478A>G	p.Arg1160Gly	Missense	意义未明突变	1980.11	38	女	汉	广东深圳	GXP1	2019.07.20	深圳	IDC	0.8	0.05	3+	0.2	Luminal B Her-2阳性	3.3cm	CT2N1M0，IIB；ypTisN1M0，IIA期	2/28	2	NAC;TCbHP*6;2019.12.30 左BCT+ALN；双靶*1年；卡培他滨？	无	无	无（2021.04.25）
		PALB2	c.110G>A	p.Arg37His	Missense	意义未明突变
91	19B3187753	CHEK2	c.538C>T	p.Arg180Cys	Missense	意义未明突变	1975.07	44	女	汉	重庆长寿	G2P1	2019.12.26	深圳	腺样囊性癌	—	—	—	0.2	TNBC	3cm	pT2N0M0；IIA	0/7	—	2020.1.13 左全切+SLNB；EC*4→T*4	无	无	无（2021.02.26）
92	19B3187752	ATM	c.875C>T	p.Pro292Leu	Missense	已知致病突变	1993.04	26	女	汉	福建南平	G0P0	2019.12.13	深圳	ILC	0.85	0.85	1+	0.15	Luminal A	2cm	pT1N0M0，IA	0/4	2	2020.1.21 左全切+SLNB；TC*4；他莫昔芬+OFS*10年	无	无	无（2021.04.15）
93	19B3187916	BRCA1	c.212G>A	p.Arg71Lys	Missense	已知致病突变	1971.07	48	女	汉	湖北黄冈	GXP1	2020.02.25	深圳	IDC	0.1	0.1	1+	0.5	Luminal B Her-2阴性	2cm	pT1N0M0，IA	0/4	3	2020.3.10 左全切+SLNB；TC*6；内分泌治疗	无	姐姐49岁乳腺癌（BRCA+）；母亲49岁乳腺癌（BRCA+）；外婆乳腺癌	无（2021.03.04）
94	19B3187909	BRCA2	c.5682C>G	p.Tyr1894*	Nonsense	已知致病突变	1974.09	45	女	汉	重庆	GXP1	2020.03.02	深圳	IDC	—	—	3+	0.6	Her-2 阳性型	1.5cm	pT1N0M0，IA	0/3	3	2020.3.19 左全切+SLNB；TC*4；曲妥*1年	2009.右乳癌	无	无（2021.04.23）
95	19B3187908	BRCA2	c.3109C>T	p.Gln1037*	Nonsense	已知致病突变	1978.05	41	女	汉	重庆	G3P1	2019.01.03	深圳	IDC	0.8	0.7	1+	0.3	Luminal B Her-2阴性	1.5cm	pT1N0M0，IA	0/3	2	2020.1.16 左全切+SLNB；TC*4；OFS+AI；2020.8.10 双侧预防性附件切除	无	无（已电联）	无（2021.08.17）
96	20B6945158	ATM	c.3153+20dupT	—	Splice	意义未明突变	1974.07	45	女	汉	吉林长春	GXP1	2020.03.15	深圳	IDC	0.9	0.1	—	0.4	Luminal B Her-2阴性	3.5cm	pT2N2M0，IIIA	6/12	2	2020.3.31 右MRM；ddEC*4→T*4；放疗；内分泌治疗	无	无	无（2021.04.07）
		SMARCA4	c.2505+15C>G	—	Splice	意义未明突变
97	19B3187921	NF1	c.6859-16A>T	—	Splice	意义未明突变	1983.05	34	女	汉	广东陆丰	GXPX	2017.07.06	深圳	DCIS	—	0.02	3+	0.25	Luminal B Her-2阳性	1.2cm	TisN0M0，0期	0/1	高级别	2017.8.18 右全切+SLNB；他莫昔芬*5年	无	无	无（2021.05.30）
		NF1	c.7814T>G	p.Leu2605Ar g	Missense	意义未明突变
98	19B3187919	—	—	—	—	—	1976.01	44	女	汉	吉林	GXP1	2020.03.12	深圳	IDC	0.9	0.9	1+	0.25	Luminal B Her-2阴性	1cm	pT1N0M0，IA	0/3	2	2020.3.30 左BCT+SLNB；TC*4；放疗；内分泌治疗	无	无	无（2021.05.10）
99	19B3187918	BARD1	c.233G>A	p.Cys78Tyr	Missense	意义未明突变	1969.09	49	女	汉	云南昆明	GXP0	2013子宫切除	深圳	IDC	0.95	0.7	1+	0.1	Luminal A	1.8cm	pT1N0M0，IA	0/6	3	2019.3.7 左BCT+SLNB；TC*4；放疗；内分泌治疗	无	母亲子宫内膜癌；父亲肠癌	无（2021.03.10)
100	20B6945126	PALB2	c.1255T>C	p.Cys419Arg	Missense	意义未明突变	1968.11	48	女	汉	广东深圳	GXP1	2016.12.10	深圳	左IDC	—	—	—	0.5	TNBC	1.3cm	pT1N0M0，IA	0/2	3	2016.12.26行左MRM；EC*4→T*4	双乳癌	无	无（2021.09.29）
		STK11	c.*16+16G>C	—	Splice	意义未明突变									右IDC	0.85	0.8	3+	0.35	Luminal B Her-2阳性	1.2cm	pT1N0M0，IA	0/5	3	2020.04.16 行右全切+SLNB；qwPH12周方案
101	20B2447023	ATM	c.6101G>A	p.Arg2034Gln	Missense	意义未明突变	1980.01	39	女	汉	湖北京山	GXP2	2019.10.28	深圳	ILC	0.8	0.8	1+	0.15	Luminal A	4cm	pT2N3M0，IIIC	21/28+3/4	2	2019.11.20 右MRM；EC*4→T*4；放疗；内分泌治疗	无	无	无（2021.07.12)
102	20B2447019	MLH1	c.1153C>T	p.Arg385Cys	Missense	意义未明突变	1986.1	33	女	汉	重庆	GXP1	2020.03.24	深圳	IDC	0.8	—	—	0.5	Luminal B Her-2阴性	3.2cm	cT2N2M0，IIIA；ypT1N1M0，IIA	1/20	3	NAC;EC*4→T*4；2020.4.14 左BCT+SLNB；OFS+AI（戈舍瑞林+阿那曲唑）；放疗	无	无	无（2021.03.26）
		MUTYH	c.74G>A	p.Gly25Asp	Missense	意义未明突变
		MUTYH	c.53C>T	p.Pro18Leu	Missense	意义未明突变
		PALB2	c.2360C>T	p.Thr787Ile	Missense	意义未明突变
103	19B3002287	MLH1	c.117-10G>A	—	Splice	意义未明突变	1979.06	40	女	汉	广东揭阳	GXP2	2020.03.13	深圳	腺样囊性癌	—	—	—	0.2	TNBC	0.7cm	pT1N0M0，IA	0/3	—	2020.4.2 左全切+SLNB；TC*4	无	无	无（2021.05.20）
104	20B2447020	PALB2	c.923C>T	p.Ala308Val	Missense	意义未明突变	1982.11	37	女	汉	湖南张家界	GXP1	2020.04.15	深圳	IDC	0.15	0.05	—	0.6	Luminal B Her-2阴性	ypT0cm	ypT0N0M0	0/4	3	NAC;TCb*4→AC*4；2020.11.10 左BCT+SLNB；TAM*5年	无	无	无（2021.07.07）
		PMS2	c.2395C>T	p.Arg799Trp	Missense	意义未明突变
105	19B3002274	CFTR	c.3205G>A	p.Gly1069Arg	Missense	疑似致病变异	1969.01	51	女	汉	广东深圳	GXP3	2019.11.14	深圳	IDC	—	—	—	0.4	TNBC	0.7cm	pT1N0M0，IA	0/3	3	NAC:TCb*4→AC*4；外院手术	无	无	无（2021.06.25）
106	20B2446958	—	—	—	—	—	1986.08	33	女	汉	黑龙江大兴安岭	GXP1	2020.05.31	深圳	IDC	0.8	0.9	—	0.2	Luminal B Her-2阴性	2.5cm	pT2N0M0，IIA	0/5	2	2020.6.18 左BCT+SLNB；TC*6；放疗；内分泌治疗	无	无	无（2021.05.21）
107	20B2446957	—	—	—	—	—	1980.04	40	女	汉	广东深圳	GXP2	2020.05.12	深圳	IDC	0.9	0.9	1+	0.2	Luminal B Her-2阴性	2.5cm	pT2N0M0，IIA	0/3	2	2020.5.26 左全切+SLNB；TC*4；OFS+AI*10年	无	无	无（2021.06.04）
108	20B2446954	BRCA2	c.6937+10G>C	—	Splice	意义未明突变	1987.07	32	女	汉	广东茂名	GXPX	2020.06.21	深圳	IDC	0.8	0.3	1+	0.25	Luminal B Her-2阴性	3cm	pT2N0M0，IIA	0/4	2	2020.7.2 右全切+SLNB；TC*6；内分泌	无	无	无（2021.05.24）
		FANCI	c.3006+10C>T	—	Splice	意义未明突变
		NF1	c.888+5G>A	—	Splice	意义未明突变
		SMARCA4	c.2859+20C>T	—	Splice	意义未明突变
109	20B2446950	PALB2	c.2586+20C>G	—	Splice	意义未明突变	1974.01	45	女	汉	广东惠州	GXP1	2020.07.04	深圳	导管内乳头状癌	0.9	0.9	-	0.1	Luminal A	1.5cm	TisN0M0，0期	0	低级别	2020.7.16 双乳区段切除；后外院行左全切	无	母亲45岁乳腺癌；姨妈46岁乳腺癌	无（2021.08.02）
110	20S8740230	—	—	—	—	—	1985.04	35	女	汉	广东深圳	GXP2	2020.07.14	深圳	IDC	—	—	—	0.6	Luminal B Her-2阴性	ypT1.0cm	cT2N0M0，IIA；ypT1N0M0，IA	0/4	3	NAC:EC*4→T*4；2020.11.26 右BCT+SLNB；放疗；卡培他滨？	无	无	无（2021.05.21）
111	19B3187924	PMS2	c.338C>G	p.Ser113*	Nonsense	疑似致病变异	1983.04	37	女	汉	广东深圳	GXPX	2020.06.20	深圳	ILC	0.8	0.9	1+	0.2	Luminal B Her-2阴性	4cm	pT2N0M0，IIA	0/2	2	2020.7.8 右全切+SLNB；TC*4；依西美坦	无	无	无（2021.08.09）
112	19B3187925	PDGFRA	c.2880+7T>C	—	Splice	意义未明突变	1984.03	36	女	汉	广东汕头	GXP2	2020.06.20	深圳	DCIS	0.8	0.05	1+	0.2	Luminal B Her-2阴性	7cm	TisN0M0，0期	0/4	中级别	2020.8.4 右全切+SLNB；内分泌TAM*5	无	姑姑60岁乳腺癌	无（2021.06.23）
		POLE	c.1021-11C>T	—	Splice	意义未明突变
		PTCH2	c.3587G>C	p.Arg1196Thr	Missense	意义未明突变
		SDHA	c.1661G>A	p.Arg554Gln	Missense	意义未明突变
113	19B3187926	BRCA1	c.4372C>T	p.Gln1458*	Nonsense	已知致病变 异	1967.11	52	女	汉	广东河源	GXPX	50岁绝经	深圳	IDC	—	—	—	0.6	TNBC	ypT0cm	cT2N0M0，IIA；ypCR	0/5	3	NAC:TCb*6 q3w；2021.1.25 左全切+SLNB	2020.8.5 双侧附件：卵巢高级别癌 IIIA期→全子宫切除+卵巢切除	无	无（2021.07.21）
114	19B3187927	MUTYH	c.53C>T	p.Pro18Leu	Missense	意义未明变异	1994.11	25	女	汉	山西太原	G0P0	2020.08.31	深圳	IDC	0.3	0.2	3+	0.3	Luminal B Her-2阳性	ypT0.7cm	cT2N0M0，IIA；ypT1N0M0 IA	0/4	3	NAC;TCbPH*6；2021.1.18 右BCT+SLNB；双靶*1年；OFS+AI*5年；放疗	无	无	无（2021.07.04）
		MUTYH	c.74G>A	p.Gly25Asp	Missense	意义未明变异
115	19B3187930	—	—	—	—	—	1958.04	62	女	汉	吉林长春	GXP1	48岁绝经	深圳	IDC	—	—	1+	0.6	Luminal B Her-2阴性	2.0cm	pT1N0M0，IA	0/8	3	2020.8.17 右全切+SLNB；TC*6；卡培他滨维持化疗	无	妹妹42岁乳腺癌（去世）；父亲91岁膀胱癌（去世）；哥哥非小细胞肺癌（去世）	无（2021.07.11）
116	19B3187933	BRCA2	c.6121T>A	p.Ser2041Thr	Missense	意义未明变异	1992.06	28	女	汉	江西抚州	GXPX	2020.06.28	深圳	IDC	0.9	0.85	1+	0.15	Luminal A	1.5cm	pT1N0M0，IA	0/4	2	2020.7.30 右全切+SLNB；后续未知	无	姐姐20岁乳腺癌	未知
117	19B3187935	CDH1	c.1565C>T	p.Thr522Ile	Missense	意义未明变异	1970.06	42	女	汉	广东深圳	GXP1	2020.07.12	深圳	IDC	0.9	0.4	1+	0.3	Luminal B Her-2阴性	1.5cm	pT1N0M0，IA	0/4	2	2012 左乳癌（IDC）手术；2014 右乳癌（DCIS）手术	双乳癌	无	2020.08 左乳癌术后胸壁复发
118	19B3187939	BRIP1	c.1315C>T	p.Arg439*	Nonsense	已知致病变异	1977.07	40	女	汉	湖北鄂州	GXP2	2018.02.20	深圳	IDC	—	—	3+	0.25	Her-2 阳性型	5cm	pT2N0M0，IIA	0/6	3	2018.2.27 右全切+SLNB；EC*4→TH*4；卡培他滨；姑息治疗（20200824）：爱立布林+PH	2019 甲状腺癌行左甲状腺癌根治（微小乳头癌）	父亲：非小细胞肺癌	2020.7 左上肺乳腺癌转移行手术；2021.4.21 左上肺再次转移
		MSH2	c.2677C>T	p.Gln893*	Nonsense	意义未明变异
119	19B3187941	STK11	c.566C>T	p.Thr189Ile	Missense	意义未明变异	1985.12	35	女	汉	安徽芜湖	G0P0	2020.04.10	深圳	IDC	—	—	0.1	0.8	TNBC	ypT0cm	cT2N0M0，IIA；ypCR	0/5	3	NAC:EC*4→T*4；2020.9.15 右BCT+SLNB；放疗	无	无	无（2021.03.17）
120	19B3187982	CHEK2	c.538C>T	p.Arg180Cys	Missense	意义未明变异	1984.11	35	女	汉	广东惠州	G0P0	2020.08.18	深圳	IDC	0.85	0.85	—	0.05	Luminal A	1cm	pT1N0M0，IA	0/3	1	2020.9.2 左BCT+SLNB；TC*4；放疗；依西美坦	无	无
121	19B3187984	—	—	—	—	—	1983.07	37	男	汉	广东五华	男 已育	—	深圳	IDC	0.6	0.01	—	0.4	Luminal B Her-2阴性	1.5cm	pT1N0M0，IA	0/4	2	2020.9.17 左全切+SLNB；TC*6；内分泌治疗	无	无	无（2021.05.02)
122	19B3187943	MSH2	c.2785C>T	p.Arg929*	Nonsense	意义未明变异	1977.01	42	女	汉	广东深圳	G3P1	2020.08.16	深圳	左IDC	左90%	左90%	—	0.4	Luminal B Her-2阴性	1.5cm	pT1N1M0，IIA	左1/24	2	2020.9.14 双全切+右SLNB+左ALN	无	无	无（2020.12.22）
		PMS2	c.883C>T	p.Arg295Trp	Missense	意义未明变异									右IDC	右90%	右90%	—	0.1	Luminal A	1.1cm	pT1N0M0，IA	右0/7	2	同上
123	19B3187944	NF1	c.7000-15G>T	—	Splice	意义未明变异	1967.01	52	女	汉	湖北荆州	GXP2	49岁绝经	深圳	右IDC	—	—	—	0.4	TNBC	ypT1.5cm	cT2N1M0，IIB；ypT1N0M0 IA	0/15	3	NAC:TCb*6；2021.3.1 右MRM；放疗；卡培他滨	2014 左乳癌行BCT TNBC T:3cm,LN;0/16；TEC*6；放疗	无	无（2021.05.28）
																									2014 左乳癌行BCT TNBC T:3cm,LN;0/16；TEC*6；放疗
124	19B3002275	CFTR	c.4357C>T	p.Arg1453Trp	Missense	意义未明变异	1977.04	43	女	汉	湖南邵阳	GXP2	2020.08.28	深圳	右ILC	右90%	0.9	—	0.2	Luminal B Her-2阴性	3cm	pT2N1M0，IIB	3/17	2	2020.9.28 双乳切+双SLNB+右ALN；EC*4→T*4；内分泌依西美坦*10年；放疗	无	无	无（2021.06.16）
															左IDC	左90%	左90%	—	0.15	Luminal A	1.2cm	pT1N0M0，IA	0/6	2
125	19B3187948	—	—	—	—	—	1988.03	32	女	汉	陕西商洛	G0P0	2020.09.17	深圳	IDC	0.85	0.8	3+	0.4	Luminal B Her-2阳性	2.2cm	pT2N0M0，IIA	0/4	3	2020.10.20 右全切+SLNB；TCbH*6；曲妥珠*1年；内分泌治疗	无	爷爷80岁食管癌	无（2021.06.11）
126	20S8740203	CDH1	c.2515G>A	p.Gly839Ser	Missense	意义未明变异	1984.05	36	女	汉	山东聊城	G5P2	2020.09.27	深圳	IDC	0.8	0.8	1+	0.1	Luminal A	1.2cm	pT1N0M0，IA	0/2	1	2020.10.19 右全切+SLNB；TC*4；内分泌	无	无	无（2021.07.26）
		FANCG	c.674C>A	p.Pro225Gln	Missense	意义未明变异
		MLH3	c.2093A>G	p.Gln698Arg	Missense	意义未明变异
		MRE11A	c.1418T>C	p.Leu473Ser	Missense	意义未明变异
		NTRK1	c.485-16C>T	—	Splice	意义未明变异
127	19B3187949	—	—	—	—	—	1980.02	40	女	汉	哈尔滨	G0P0	2020.10.18	深圳	IDC	0.9	0.9	1+	0.1	Luminal A	2.5cm	pT2N1M0，IIB	1/19	2	2020.11.2 右全切+SLNB+ALN；EC*4→T*4；内分泌治疗；放疗	2008 甲状腺癌 2013行颈清	无	无（2021.02.16）
128	19B3187950	BARD1	c.233G>A	p.Cys78Tyr	Missense	意义未明变异	1978.07	39	女	汉	湖北钟祥	G0P0	2017.07.21	深圳	IDC	0.8	0.6	3+	0.3	Luminal B Her-2阳性	2.5cm	cT2N1M0，IIB；ypT1N0M0 IA	0/9	2	NAC:ddEC*4→T*4；戈舍瑞林（q28d）；2017.12.20 右BCT+ALN；曲妥珠*1年；放疗*8次；内分泌治疗	无	无	无（2021.05.12）
129	19B3187951	BRCA2	c.5171T>C	p.Ile1724Thr	Missense	意义未明变异	1988.08	32	女	汉	江西上饶	G0P0	2020.12.19	深圳	IDC	—	1+	—	0.6	Luminal B Her-2阴性	2.8cm	cT2N0M0，IIA；ypCR	0/5	3	NAC;2020.10.29 ddEC*4→P*4；2021.2.23 左BCT+SLNB；放疗；	无	无	无（2021.02.21）
		RAD50	c.1636G>A	p.Ala546Thr	Missense	意义未明变异
130	19B3187952	BRCA1	c.3294delT	p.Pro1099Leu fs*10	Frameshift	已知致病变异	1986.05	34	女	汉	江西赣州	G5P3	2020.10.14	深圳	IDC	0.1	0.05	0.2	0.8	Luminal B Her-2阴性	1.5cm	pT1N0M0，IA	0/5	3	2020.11.3 左BCT+SLNB；EC*4→TCb*4；卡瑞丽珠单抗；2021.6.3 行预防性双侧附件切除	无	2个姑姑卵巢癌	无（2021.07.06）
		SPINK1	c.194+2T>C	—	SpliceDonor	已知致病变异
		PALB2	c.2360C>T	p.Thr787Ile	Missense	意义未明变异
131	19B3187955	ATM	c.2776A>T	p.Lys926*	Nonsense	疑似致病变异	1964.05	56	女	汉	广东河源	GXP1	53岁绝经	深圳	IDC	0.9	0.6	3+	0.4	Luminal B Her-2阳性	1.5cm	pT1N0M0，IA	0/3	2	2020.11.19 右BCT+SLNB；曲妥珠*1年；放疗；AI*10年	无	母亲、大姨乳腺癌	2021.7.13右乳复发？（B超示疤痕处4a类肿物）
132	19B3187956	RAD50	c.1052-6dupT	—	Splice	意义未明变异	1979.01	40	女	汉	广东深圳	GXP1	2020.05.17	深圳	IDC	0.9	0.2	1+	0.6	Luminal B Her-2阴性	2cm	cT2N1M0，IIB；ypT1N0M0 IA	0/28	2	2020.7.3 EC*4→T*4；2020.11.9 右MRM；放疗；卡培他滨？OFS+AI	无	无	无（2021.05.31）
133	19B3187957	—	—	—	—	—	1978.01	42	女	汉	四川乐山	GXP1	2020.10.23	深圳	IDC	—	—	3+	0.6	Her-2 阳性型	5.5cm	cT3N1M0，IIIA；ypCR	0/15	1	2020.11.25 TCbHP*6 q21d；2021.4.8 右MRM；双靶*1年；放疗	无	无	无（2021.08.23）
134	19B3187960	—	—	—	—	—	1987.09	33	女	汉	广东湛江	GXP0	2020.11.14	深圳	IDC	0.6	0.05	3+	0.4	Luminal B Her-2阳性	4.2cm	cT2N0M0，IIA；ypCR	0/4	3	NAC:2020.12.17 TCbHP*6 q21d；2021.4.29 左BCT+SLNB；双靶*1年；放疗；TAM*5年	无	无	无（2021.07.20）
135	19B3187961	—	—	—	—	—	1983.01	37	女	汉	广东湛江	G2P2	2020.12.03	深圳	IDC	0.6	0.6	3+	0.4	Luminal B Her-2阳性	3.2cm	cT2N1M0，IIB；ypT1N0M0 IA	0/4	3	NAC:2020.12.17 TCbHP*6 q21d；2021.4.25 左BCT+SLNB；卡培他滨；双靶*1年；放疗；OFS+AI*5年	无	无	无（2021.08.06）
136	19B3187967	—	—	—	—	—	1963.09	55	女	汉	江苏南通	GXPX	51岁绝经	深圳	IDC	—	—	3+	0.2	Her-2 阳性型	0.7cm	pT1N0M0，IA	0/7	3	2018.10.8 右BCT+SLNB；2018.10.24 EC*4→TH*4；放疗；曲妥珠单抗*1年；依西美坦*5年	2015 左乳癌行左MRM；CMF*6 来曲唑至今	无	无（2020.09.11）
137	19B3187970	ACVRL1	c.77C>T	p.Pro26Leu	Missense	意义未明变异	1971.01	49	女	汉	广东惠州	GXPX	未知	深圳	DCIS	—	0.01	3+	0.2	Luminal B Her-2阳性	—	TisN0M0，0期	0/3	高级别	2021.1.8 右全切+SLNB	2016.8.2 左乳癌行全切+SLNB；免疫组化同右乳癌	无	无（2021.05.13）
		ENG	c.1742-13C>T	—	Splice	意义未明变异
		MLH1	c.1742C>T	p.Pro581Leu	Missense	意义未明变异
138	19B3002279	RAD51D	c.550G>A	p.Glu184Lys	Missense	意义未明变异	1969.02	51	女	汉	广东深圳	GXP1	50岁绝经	深圳	IDC	0.9	0.3	—	0.4	Luminal B Her-2阴性	1.8cm	pT1N0M0，IA	0/4	2	2021.2.8 右全切+SLNB；TC*4；AI*10年	无	母亲72岁乳腺癌；姐姐37岁双侧乳腺癌	无（2021.04.25）
139	19B3187972	BRCA2	c.8537_8538delAG	p.Glu2846Gly fs*22	Frameshift	已知致病变异	1990.09	30	女	汉	湖北武冈	GXPX	2021.02.12	深圳	IDC	0.9	0.4	—	0.7	Luminal B Her-2阴性	2.5cm	pT2N1M0，IIB	1/4	2	2021.2.23 右BCT+SLNB；EC*4→T*4；放疗；内分泌*10年	无	姨妈40岁乳腺癌；外婆肝癌；舅舅肝癌	无（2021.07.22）
140	19B3187973	—	—	—	—	—	1983.06	37	女	汉	广东深圳	GXPX	2021.02,13	深圳	IDC	—	—	—	0.7	TNBC	1.5cm	pT1N0M0，IA	0/4	3	2021.2.23 右BCT+SLNB；EC*4→T*4；放疗；卡培他滨*1年	无	无	无（2021.07.23）
141	19B3187971	ATM	c.283C>A	p.Gln95Lys	Missense	意义未明变异	1980.03	40	女	汉	广东揭阳	GXPX	2021.01.21	深圳	IDC	—	—	3+	0.7	Her-2 阳性型	3.9cm	pT2N0M0，IIA	0/4	3	2021.2.22 左BCT+SLNB；TCbPH*6 q3w；双靶*1年	无	无	无（2021.07.07）
142	21B05019157	FH	c.259C>T	p.Arg87Cys	Missense	意义未明变异	1980.11	40	女	汉	广东惠州	G4P2	2020.12.18	深圳	IDC	—	0.05	1+	0.7	Luminal B Her-2阴性	1.5cm	CT1N1M0，IIA；ypCR	0/5	3	2020.12.4 NAC;EC*4→T*4；2021.4.6 右BCT+ALN；放疗	无	姨妈60岁乳腺癌	无（2021.08.23）
		MLH3	c.3379+20C>G	—	Splice	意义未明变异
		PTCH2	c.1255G>A	p.Ala419Thr	Missense	意义未明变异
		RET	c.3178A>G	p.Lys1060Glu	Missense	意义未明变异
143	21B05019152	BARD1	c.1338C>A	p.Tyr446*	Nonsense	已知致病变异	1971.07	44	女	汉	广东深圳	G3P2	2016.01.21	深圳	IDC	0.4	0.6	3+	0.4	Luminal B Her-2阳性	1cm	pT1N1M0，IIA	2/18	2	2015.2.4 左全切+SLNB+ALN；AC*4→TH*4；曲妥珠*1年；放疗；托瑞米芬→依西美坦+OFS	无	无	无（2021.03.03）
144	21B05019151	PALB2	c.2608G>T	p.Val870Leu	Missense	意义未明变异	1984.01	37	女	汉	湖北武汉	GXPX	2021.03.05	深圳	IDC	—	—	—	0.7	TNBC	2.2cm	pT2N0M0，IIA	0/5	3	2021.4.8 左BCT+SLNB；ddEC*4→P*4 q14d；放疗；卡培他滨？	无	奶奶60岁结直肠癌	无（2021.08.16）
145	21B05019150	PTCH2	c.1568C>T	p.Ala523Val	Missense	意义未明变异	1992.01	29	女	汉	广东深圳	GXP0	2021.03.19	深圳	IDC	0.8	0.9	1+	0.15	Luminal A	2cm	pT1N0M0，IA	0/2	1	2021.4.2 左全切+SLNB；TC*4；OFS+依西美坦*5年	无	姐姐甲状腺癌	无（2021.08.05）
146	21B05019145	—	—	—	—	—	1973.11	47	女	汉	广东云浮	GXP2	2020.11.30	深圳	IDC	0.9	0.6	—	0.3	Luminal B Her-2阴性	1.5cm	pT1N0M0，IA	0/3	2	2020.12.24 左BCT+SLNB；TC*4；放疗；内分泌	无	无	无（2021.03.26）
147	21B05019145	MSH6	c.3173-10C>A	—	Splice	意义未明变异	1977.03	43	女	汉	湖南长沙	G3P1	2020.12.20	深圳	IDC	0.9	0.9	—	0.2	Luminal B Her-2阳性	2.2cm	pT2N1M0，IIB	1/8	2	2021.1.7 左BCT+SLNB；TC*6；放疗；OFS+AI	无	无	无（2021.04.06）
148	19B3002291	EPCAM	c.327G>C	p.Gln109His	Missense	意义未明变 异	1978.07	42	女	汉	广东清远	GXP1	2021.03.21	深圳	IDC	0.9	0.5	3+	0.3	Luminal B Her-2阳性	ypT1cm	cT3N2M0 IIIA；ypT1N1M0，IIA	2/12	2	2020.12.25 NAC:ECPH*4 q3w→TPH*4 q2w；2021.5.19 左MRM；PH*1年；内分泌治疗；放疗	无	无	无（2021.08.25）
149	19B3002290	BRCA1	c.4327C>T	p.Arg1443*	Nonsense	已知致病变 异	1991.03	30	女	汉	安徽	GXP0	2021.04.28	深圳	IDC	—	0.01	—	0.6	Luminal B Her-2阴性	1.5cm	pT1N0M0，IA	0/3	2	2020.12.24 左BCT+SLNB；TC*4；放疗；内分泌	无	母亲36岁胰腺癌去世；舅舅白血病去世；外公胃肠癌	未知
150	19B3002292	—	—	—	—	—	1979.09	41	女	汉	安徽池州	GXP1	2021.03.23	深圳	右IDC	0.5	0.7	3+	0.4	Luminal B Her-2阳性	2.2cm	cT2N0M0，IIA；ypT1N0M0 IA	0/4	2	2021.4.12 NAC;TCbPH*6;2021.8.11 双乳切+双SLNB；卡培他滨？内分泌*10年	无	无
															左DCIS	—	—	—	0.1	TNBC	1.3cm	ypTisN0M0	0/4	高级别
151	19B3002294	—	—	—	—	—	1993.11	27	女	汉	内蒙古安盟	GXPX	2021.02.01	深圳	IDC	0.9	0.8	3+	0.6	Luminal B Her-2阳性	2.5cm	cT2NxM0；ypT1N0M0 IA	0/4	2	外院NAC:TCbPH*6 2021.6.7 左BCT+SLNB；靶向*1年；内分泌；放疗	无	姨妈45岁乳腺癌	无（2021.7.14）
152	21B05019138	PMS1	c.966+6T>C	—	Splice	意义未明变 异	1975.04	45	女	汉	黑龙江鹤岗	GXP1	2021.01,21	深圳	IDC	—	—	—	0.5	TNBC	2.2cm	cT2N1M0,IIB；ypT1N0M0；IA	0/22	3	2021.2.4 NAC:EC*4→T*4 q2w；2021.6.1 右MRM+扩张器；卡培他滨*1年；放疗	无	父亲肺癌
153	21B05019137	BRCA2	c.7976+1G>A	—	SpliceDon or	已知致病变 异	1985.11	35	女	汉	江西南昌	GXPX	2021.05.31	深圳	IDC	0.7	0.6	—	0.08	Luminal A	1.1cm	pT1N1M0，IIA	1/17	2	2020.6.17 右BCT+ALN；EC*4→T*4；内分泌治疗	无	无
		MUTYH	c.857G>A	p.Gly286Glu	Missense	已知致病变 异
154	21B05019136	SMARCA4	c.3082-18C>T	—	Splice	意义未明变 异	1979.12	39	女	汉	江西抚昌	GXP2	2019.06.13	深圳	IDC	—	—	3+	0.2	Her-2 阳性型	2.5cm	cT2N1M0，IIB；ypT2N2M0 IIIA	4/17	3	2019.7.17 NAC EC*4→THP*4 q3w;2020.1.13 右MRM；放疗*25次，T-DM 1*1年	无	叔叔肝癌	无（2021.06.20）
155	19B3002296	—	—	—	—	—	1980.01	41	女	汉	湖南常德	GXP2	2021.05.20	深圳	IDC	0.01	0.01	3+	0.1	Luminal B Her-2阳性	1cm	pT1N0M0，IA	0/6	1	2021.6.21 左BCT+SLNB；TCbH*6 q21d	无	母亲57岁卵巢癌；姨妈47岁宫颈癌
156	21B05019135	ATM	c.3402+14A>C	—	Splice	意义未明变 异	1968.03	53	女	汉	四川成都	GXPX	52岁绝经	深圳	IDC	0.2	—	3+	0.3	Luminal B Her-2阳性	1.5cm	pT1N0M0，IA	0/4	2	2021.7.5 右BCT+SLNB；TCbH*6	无	姐姐46岁乳腺癌；舅舅胃癌；妈妈65岁胰腺癌
		CDK12	c.1987C>T	p.Arg663Cys	Missense	意义未明变 异
157	21B05019134	—	—	—	—	—	1987.06	33	女	汉	湖南郴州	GXP2	2021.02.15	深圳	IDC	—	—	3+	0.4	Her-2 阳性型	2.4cm	cT2N1M0，IIB；ypT1N0M0 IA	0/4	3	2021.3.5 NAC: TCbPH*6；2021.7.2 左全切+SLNB；T-DM1 ;	无	父亲51岁食管癌
158	21B05019133	CHEK2	c.538C>T	p.Arg180Cys	Missense	意义未明变 异	1983.04	38	女	汉	广东河源	GXP0	2021.07.07	深圳	IDC	0.95	0.95	—	0.25	Luminal B Her-2阴性	1.5cm	pT1N0M0，IA	0/4	2	2021.7.6 右全切+SLNB；TC*4	无	无
159	21B05019132	BRCA2	c.2122T>A	p.Ser708Thr	Missense	意义未明变 异	1982.03	39	女	汉	广东潮州	GXP2	2021.06.22	深圳	LCIS	0.95	0.4	——	——	Luminal	1.2cm	pTisN0M0，0期	0	低级别	2021.7.6 行右乳肿物扩大切除术	无	无
		PALB2	c.49-3C>T	—	Splice	意义未明变 异
160	21B05019131	—	—	—	—	—	1992.09	28	女	汉	广东汕尾	GXP0	2021.06.21	深圳	DCIS	0.8	0.7	1+	0.05	Luminal A	0.6cm	TisN0M0，0期	0/3	低级别	拒绝手术及治疗	无	无
161	21B05019130	PMS1	c.2755C>T	p.Arg919Cys	Missense	意义未明变 异	1985.01	35	女	汉	广东湛江	GXPX	2021.01.24	深圳	IDC	—	0.05	1+	0.6	Luminal B Her-2阴性	2.3cm	cT2N0M0，IIA；ypCR	0/7	3	2021.2.21 NAC:EC*4→T*4 q2w；2021.6.28 左BCT+SLNB；放疗；卡培他滨？	无	无
162	21B05019127	ALK	c.2210C>T	p.Ser737Leu	Missense	意义未明变 异	1971.1	49	女	汉	四川眉山	GXP0	2021.06.05	深圳	右IDC	0.8	0.4	—	0.15	Luminal A	1.2cm	pT1N0M0，IA	3/20	2	2021.7.27 右MRM+左全切+左SLNB；EC*4→T*4；内分泌治疗	双乳癌	父亲直肠癌	无
		BRCA1	c.3662A>C	p.Glu1221Ala	Missense	意义未明变 异									左DCIS	0.9	0.6	—	0.2	Luminal B Her-2阴性	2.5cm	pTisN0M0，0期	0/2	2
		BRCA1	c.4166G>A	p.Ser1389Asn	Missense	意义未明变 异
163	19B3002297	—	—	—	—	—	1968.04	53	女	汉	北京	GXP1	2020.05.04	深圳	IDC	0.5	—	1+	0.1	Luminal B Her-2阴性	0.6cm	pT1N0M0，IA	0/5	1	2021.7.21 右BCT+SLNB；TC*4	无	姐姐49岁乳腺癌（BRCA+）；母亲49岁乳腺癌（BRCA+）；外婆乳腺癌
164	21B05019124	BRCA2	c.8401_8403delinsAAAA	p.Phe2801Lysfs*11	Frameshift	已知致病变异	1986.12	34	女	汉	天津	GXPX	2021.03.16	深圳	IDC	0.9	0.7	—	0.2	Luminal B Her-2阴性	2cm	cT2N1Mx；ypT1N1M0 IIA	1/15	2	2021.4.3 EC *4→T*4 q2w；2021.8.4 左BCT+ALN	无	无
165	21B05019122	BRCA2	c.6547delG	p.Glu2183Asnfs*8	Frameshift	已知致病变异	1989.11	29	女	汉	湖北荆州	GXP1	2019.09.12	深圳	DCIS	0.8	0.7	1+	0.05	Luminal A	0.6cm	TisN0M0，0期	0/3	低级别	2021.10.28 右全切+SLNB；他莫昔芬*5年	无	无	无（2021.08.08）
166	21B05019123	BRCA1	c.3913G>C	p.Asp1305His	Missense	意义未明变 异	1982.11	38	女	汉	陕西榆林	GXPX	2021.04.14	深圳	IDC	0.9	0.7	1+	0.5	Luminal B Her-2阴性	2.4cm	cT2N2M1,IV期	4/14	4	2021.5.2 姑息治疗 EC*4→T*4 q2w	乳腺癌骨转移	无	发现已骨转移
		RAD50	c.1245+7A>G	—	Splice	意义未明变异
167	21B05019121	—	—	—	—	—	1982.01	38	女	汉	广东增城	GXP2	2021.07.19	深圳	IDC	0.8	0.95	—	0.4	Luminal B Her-2阴	1.3cm	pT1N0M0，IA	0/4	2	2021.08.11 右BCT+SLNB；TC*6	无	无	无（2021.11.08）
168	21B17241668	CDK12	c.3760+12G>A	—	Splice	意义未明变异	1980.08	41	女	汉	广东河源	GXP0	2021.07.24	深圳	IDC	0.9	0.9	—	0.1	Luminal A	1.0cm	pT1N0M0，IA	0/6	1	2021.08.20 左BCT+SLNB；放疗*15；化疗不详	2021.08.31 宫颈CIN III	无	无（2021.12.13）
		MUTYH	c.74G>A	p.Gly25Asp	Missense	意义未明变异
		MUTYH	c.53C>T	p.Pro18Leu	Missense	意义未明变异
		RAD51C	c.635G>A	p.Arg212His	Missense	意义未明变异
169	21B05019118	—	—	—	—	—	1976.07	45	女	汉	河南安阳	GXPX	20201.04.06	深圳	ILC	0.9	0.9	1+	0.1	Luminal A	6.7cm	cT4NxM0 III期	5/5	2	2021.03.20 NAC:ddEC*4→T*4；2021.09.08 右BCT+右侧副乳腺癌根治+右ALN	2021.03 同期发现右副乳腺癌	无	无（2021.12.20）
170	21B17241667	—	—	—	—	—	1989.02	32	女	汉	湖南永州	GXPX	2021.07.35	深圳	IDC	0.8	0.8	—	0.4	Luminal B Her-2阴	2.5cm	cT2N0M0，IIA；ypT2N0M0，IIA	0/5	2	2021.08.26 NAC AC*4→T*4；2021.12.28 右全切+SLN	无	无	时间过短
171	21B17241673	—	—	—	—	—	1978.04	42	女	汉	福建永州	GXPX	2020.11.15	深圳	IDC	0.8	0.8	1+	0.15	Luminal A	7cm	cT3N1M0，IIIA；	6/10	1	2020.12.09 NAC:ddEC*4→T*4；2021.04.19 右BCT+ALN	无	无	无（2021.11.02）
172	21B17241671	CDH1	c.43C>G	p.Leu15Val	Missense	意义未明变异	1979.03	42	女	汉	广东河源	GXPX	2021.05.11	深圳	IDC	0.9	0.9	—	0.4	Luminal B Her-2阴	1.2cm	cT1N1M0，IIA；ypCR	0/23	3	2021.04.27 NAC ddEC*4→T*4；2021.08.20 右BCT+ALN	无	姨 54 岁诊断乳腺癌	无（2022.01.07）
173	21B17241672	NBN	c.37+6G>A	—	Splice	意义未明变异	1970.11	50	女	汉	广东梅州	GXPX	2021.07.18	深圳	IDC	—	—	—	0.6	TNBC	yp1cm	cT2N0M0，IIA;ypT1N0M0,IA		3	2021.08.27 NAC ddEC*4→T*4；2021.12.22 右BCT+SLNB	无	无	时间过短
174	19B3002299	BRCA1	c.1214C>A	p.Ser405*	Nonsense	已知致病变异	1980.12	40	女	汉	安徽阜阳	GXPX	2021.08.20	深圳	IDC	1% 1+	—	—	0.3	TNBC	PT1.7cm	pT1N0M0，IA	0/4	3	2021.09.01 左BCT+SLNB；2021.09.10 ddEC*4→T*4；放疗	无	无	无（2021.12.20）
175	21B17241678	—	—	—	—	—	1986.09	34	女	汉	广东惠州	GXP0	2021.09.02	深圳	DCIS	0.8	0.8	1+	0.3	Luminal B Her-2阴	1.7cm	pTisN0M0，0期	0/5	中级别	2021.10.09 左全切+SLNB	无	姑姑乳腺癌	时间过短
176	21B17241677	MRE11A	c.846-9C>T	—	Splice	意义未明变异	1981.04	36	女	汉	广东深圳	GXP2	2018.02.23	深圳	右IDC	0.9	0.9	3+	0.5	Luminal B Her-2阳	2.0cm	pT1N0M0，IA期	0/19	1	2013 行右MRM，术后行FEC-TH、靶向、他莫昔芬+戈舍瑞林2年半	双乳癌	父亲肺癌	2018 右胸壁复发；2021胸骨转移、左胸锁乳突肌转移癌
		MSH6	c.4001+15_40 01+35dupAT AATGGAATT ATAACTAACT	—	Splice	意义未明变异									左DCIS	0.7	0.2	3+	0.3	Luminal B Her-2阳	1.5cm	TisN0M0，0期		高级别
177	21B17241676	PMS1	c.2755C>T	p.Arg919Cys	Missense	意义未明变异	1981.08	40	女	汉	广东深圳	GXPX	2021.08.23	深圳	DCIS伴微浸润	—	—	3+	0.2	Her-2 阳性型	5cm	pT2N0M0，IIA	0/6	高级别	2021.09.08 右全切+SLNB；2021.10.09 TH*12	无	无	无（2021.12.09）
	19B3002301	MSH6	c.1063G>A	p.Gly355Ser	Missense	意义未明变异	1988.08	33	女	汉	广东深圳	GXP0	2021.08.26	深圳	IDC	—	0.15	1+	0.6	Luminal B Her-2阴	1.3cm	CT1N1M0，IIA；	2/19	3	2021.10.01 NAC ddEC*4→T*4；准备手术治疗	无	二伯肺癌	时间过短
		MUTYH	c.74G>A	p.Gly25Asp	Missense	意义未明变异
		MUTYH	c.53C>T	p.Pro18Leu	Missense	意义未明变异
		STK11	c.597+21dupG	—	Splice	意义未明变异
178	21B17241680	—	—	—	—	—	1983.09	37	女	汉	广东河源	GXP0	2021.05.28	深圳	IDC	—	—	—	0.3	TNBC	2.2cm	ypT2N1M0 IIb期	3/12	2	20201.07.05 NAC ddEC*4→T*4；2021.10.28 右MRM；放疗	无	无	时间过短
179	21B17241681	MLH1	c.1136A>C	p.Tyr379Ser	Missense	意义未明变异	1974.06	47	女	汉	广东深圳	GXPX	2021.08.15	深圳	ILC	0.9	0.9	—	0.05	Luminal A	0.25cm	pT1N0M0，IA	0/3	低级别	2021.09.14 右BCT+SLNB，术后放疗+内分泌	右肺癌（新发）	无	时间过短
180	21B17241682	ATM	c.5177+3G>A	—	Splice	意义未明变异	1984.08	37	女	汉	广东梅州	GXPX	2021.08.31	深圳	IDC	—	—	—	0.8	TNBC	5.6cm	cT3N0M0 IIIA 期		3	2021.09.17 NAC ddEC*4→T*4；还未手术	无	无	时间过短
181	21B17241685	—	—	—	—	—	1979.09	41	女	汉	湖南益阳	GXP1	2021.04.10	深圳	IDC	0.9	0.1	—	0.15	Luminal B Her-2阴	yp1.0cm	cT1N1M0 IIa期；ypT1N0M0，I期	0/17	2	20211.05.14 NAC ddEC*4→T*4；2021.9.16 右BCT+ALN；内分泌+放疗	无	父亲 50 岁诊断胆管癌 母亲 50 岁诊断结直肠癌	无（2021.12.15）
182	21B17241686	NF1	c.4772+11C>T	—	Splice	意义未明变异	1979.06	39	女	汉	湖南永州	GXP2	2019.01.05	深圳	IDC	—	—	3+	0.2	Her-2 阳性型	1.3cm	pT1N0M0，IA	0/12	2	2019.01.21 右BCT+SLNB	无	无	2021右乳癌复发
		PMS2	c.1748A>T	p.Glu583Val	Missense	意义未明变异
183	21B17241688	BARD1	c.1495C>A	p.His499Asn	Missense	意义未明变异	1980.06	41	女	汉	湖北天门	GXPX	2021.09.01	深圳	IDC	—	0.3	3+	0.6	Luminal B Her-2阳	3.4cm	cT2N1M0 IIB	3/12	2	2021.09.27 NAC TCbPH*6 还未手术	无	父亲肝癌（去世）	时间过短
		MSH6	c.3970G>C	p.Glu1324Gln	Missense	意义未明变异
184	19B3002302	MUTYH	c.934-2A>G	—	SpliceAcce ptor	意义未明变异	1991.12	29	女	汉	湖北潜江	GXP0	2021.08.21	深圳	IDC	0.95	0.9	—	0.1	Luminal A	1.0cm	pT1N0M0，IA	0/4	2	2021.09.24 左BCT+SLNB；TC*4,	无	无	时间过短
185	19B3002303	—	—	—	—	—	1982.12	38	女	汉	江西九江	GXP0	2021.09.10	深圳	IDC	0.9	0.9	1+	0.4	Luminal B Her-2阴	2.2cm	pT2N0M0，IIA期	0/5	3	2021.09.29 左BCT+SLNB；TC*4	无	母亲诊断宫颈癌 爷爷诊断非小细胞肺癌	时间过短
186	19B3002304	—	—	—	—	—	1983.01	37	女	汉	湖北宜昌	GXPX	2021.05.01	深圳	IDC	—	0.2	3+	0.25	Luminal B Her-2阳性	2.2cm	ypCR	0/12	3	2021.5.26 NAC:TCbHP*6;2021.10.09 左BCT+ALN；	无	无	无（2021.11.19）
187	19B3187700	ATM	c.6067G>A	p.Gly2023Arg	Missense	意义未明变异	1982.08	39	女	汉	广东汕头	GXP0	2021.08.15	深圳	DCIS	0.95	0.95	1+	0.15	Luminal A	1.0cm	TisN0M0，0期	0	低级别	2021.09.13 左区段切除术；放疗	无	无	时间过短
188	19B3187701	BRCA1	c.5056C>G	p.His1686Asp	Missense	疑似致病变异	1975.09	46	女	汉	重庆	GXP1	2021.09.18	深圳	IDC	—	—	—	0.4	TNBC	1cm	pT1N0M0，IA	0/3	3	2021.10.18 右BCT+SLNB；dEC*4→T*4；	无	姐姐 45 岁诊断乳腺癌	时间过短
189	19B3187702	—	—	—	—	—	1981.1	39	女	汉	广东汕尾	GXPX	2021.05.14	深圳	IDC	0.9	0.9	1+	0.05	Luminal A	2.5cm	cT2N1M0 IIB	3/17	1	2021.06.22 ddAC*4→T*4；2021.10.14 左MRM	无	无	时间过短
190	19B3187703	BRCA1	c.2882A>G	p.Asn961Ser	Missense	意义未明变异	1988.01	33	女	汉	广东汕尾	G4P3	2021.01.05	深圳	IDC	0.9	0.9	1+	0.2	LuminalB Her-2阴性型	1.3cm	pT1N0M0，IA	0/4	2	2021.10.19 右BCT+SLNB；TC*4	无	母亲 60 岁诊断乳腺癌	时间过短
191	19B3187709	BRCA2	c.4376A>G	p.Asn1459Ser	Missense	意义未明变异	1990.11	29	女	汉	广东揭阳	GXP0	2020.10.11	深圳	IDC	0.05	0.05	3+	0.2	Luminal B Her-2阳	5cm	cT3N1M0 IIIA期；ypTisN0M0 0期	0/17	3	2021.2.20 NAC:TCbHP*6 2021.06.28 右MRM；术后双靶	无	无	时间过短
		RAD50	c.3508G>A	p.Asp1170Asn	Missense	意义未明变异
		SMARCA4	c.4967C>T	p.Pro1656Leu	Missense	意义未明变异
192	21B17241691	BRCA1	c.4097-1G>A	—	SpliceAcce ptor	已知致病变异	1976.11	44	女	汉	湖北荆州	GXPX	2021.09.16	深圳	IDC	—	—	—	0.6	TNBC	1.5cm	pT1N0M0，IA	0/4	3	2021.10.22 左BCT+SLNB；2021.11.4 ddAC*4→T*4	无	舅舅 50 岁诊断肝细胞癌	时间过短
193	21B17241692	BRCA2	c.3628_3629delGA	p.Asp1210*	Nonsense	已知致病变异	1981.12	39	女	汉	广东深圳	GXP0	2021.09.21	深圳	左IDC	—	—	—	0.6	TNBC	0.6cm	pT1N0M0，IA	0/7	3	2021.11.08 左全切+SLNB；术后化疗	双乳癌	无	时间过短
															右IDC	0.05	0.05	3+	0.2	Luminal B Her-2阳					2010.10.26 外院行右MRM 术后ddAC*4→T*4；放疗35次
194	21B17241693	BARD1	c.2224T>G	p.Leu742Val	Missense	意义未明变异	1981.04	40	女	汉	广东惠州	GXP2	2021.10.23	深圳	IDC	0.9	0.9	—	0.05	Luminal A	1.8cm	pT1N0M0，IA	0/4	2	2021.11.15 左BCT+SLNB；TC*4	无	无	时间过短
195	21B17241695	CHEK2	c.246_260del CCAAGAACC TGAGGA	p.Asp82_Glu86del	Deletion	意义未明变异	1983.11	37	女	汉	湖南岳阳	GXP2	2021.11.10	深圳	IDC	—	0.05	3+	0.4	Luminal B Her-2 阳性型	5.6cm	cT3-4cN2M0 III期	14	3	2021.11.10 NAC:TCbHP*6；	无	无	时间过短
196	21B17241694	MSH2	c.2783C>T	p.Ser928Leu	Missense	意义未明变异	1977.07	44	女	汉	四川达州	GXP2	2021.10.07	深圳	IDC	0.9	0.9	3+	0.15	Luminal B Her-2阳	2.3cm	cT2N1M0 IIB	3/18	3	2021.11.18 NAC;TCbHP*6;	无	无	时间过短
197	19B3187720	—	—	—	—	—	1980.12	40	女	汉	广东河源	GXPX	2021.10.28	深圳	IDC	—	—	—	0.6	TNBC	2.3cm	cT2N0M0 IIA	0/4	3	2021.11.10 NAC:ddEC*4→T*4；	无	无	时间过短
198	19B3187741	CDH1	c.602C>T	p.Pro201Leu	Missense	意义未明变异	1983.05	38	女	汉	吉林白城	GXPX	2021.11.15	深圳	IDC	0.8	0.7	3+	0.1	Luminal B Her-2 阳性型	2.4cm	cT2N3M0，IIIC；	16/17	2	2021.12.21 NAC:TCbHP *6;	无	无	时间过短
199	19B3187772	—	—	—	—	—	1987.04	34	女	汉	福建莆田	GXPX	2021.1	深圳	IDC	0.9	0.9	1+	0.3	Luminal B Her-2阴性	2.5cm	pT2N1M0，IIB	1/8	2	2021.12.01 左BCT+SLNB；TC*4	无	无	时间过短
200	21B17241700	BRCA1	c.5339T>C	p.Leu1780Pro	Missense	已知致病变异	1973.1	47	女	汉	广东梅州	GXP1	2021.05.17	深圳	IDC	0.85	0.7	—	0.4	Luminal B Her-2阴	1.3cm	pT1N0M0，IA	0/7	3	2021.06.21 左BCT+SLNB；TC*4；OFS+AI	无	母亲诊断胰腺癌	时间过短
201	21B17241701	—	—	—	—	—	1982.08	39	女	汉	山东聊城	GXPX	2021.11.19	深圳	IDC	0.9	0.9	1+	0.05	Luminal A	1.0cm	pT1N0M0，IA	0/3	1	2021.12.6 右BCT+SLNB；TC*4	无	无	时间过短
202	21B17241702	MLH1	c.2235C>G	p.Asn745Lys	Missense	意义未明变异	1982.11	38	女	汉	辽宁	GXP2	2021.07.18	深圳	IDC	—	—	—	0.7	TNBC	3cm	cT2N1M0 IIB	0/3	3	2021.07.27 NAC:TAC*6;2021.12.02 右BCT+SLNB	无	无	时间过短
203	19B3187781	—	—	—	—	—	1977.04	44	女	汉	广东潮州	GXPX	2021.10.30	深圳	左DCIS	0.9	0.7	1+	0.1	Luminal A	2.8cm	TisN0M0，0期	0/3	中级别	2021.12.01 双乳切+SLNB；TC*4	无	无	时间过短
															右IDC	0.9	0.8	1+	0.15	Luminal A	0.7cm	pT1N0M0，IA	0/6	2
204	21B17241704	CDH1	c.1018A>G	p.Thr340Ala	Missense	意义未明变异	1978.04	43	女	汉	湖北荆门	GXPX	2021.11.10	深圳	左ILC	0.8	0.9	1+	0.2	Luminal B Her-2阴	2cm	pT1N0M0，IA	0/5	3	2021.12.03 左BCT+SLNB；TC*4	无	无	时间过短
		SMARCA4	c.602A>T	(p.Gln201Leu	Missense	意义未明变异
205	21B17241705	—	—	—	—	—	1992.05	29	女	汉	广东汕头	GXP0	2021.11.18	深圳	IDC	0.8	0.7	3+	0.2	Luminal B Her-2阳	1.2cm	CT1N1M0，IIA；	1/8	2	2021.12.17 TCbPH *6;戈舍瑞林	无	母亲 乳腺癌	时间过短
206	21B17241706	MSH2	c.792+4C>T	—	Splice	意义未明变异	1969.09	51	女	汉	广东深圳	GXPX	绝经	深圳	右IDC	—	—	3+	0.25	Her-2阳性型	2cm	pT1N0M0，IA	0/5	3	2021.08.07一线用药 TCbPH	双乳癌；右乳癌伴骨、腋窝及锁骨上淋巴结转移	双乳癌；右乳癌伴骨、腋窝及锁骨上淋巴结转移	双乳癌；右乳癌伴骨、腋窝及锁骨上淋巴结转移
		RAD50	c.3790C>T	p.Leu1264Phe	Missense	意义未明变异									左IDC	0.9	0.9	-	0.4	Luminal B Her-2阴	3cm	pT2N0M0，IIA	0/18	2	2009 我院行左MRM；术后化疗4次；内分泌1年
207	19B3187787	—	—	—	—	—	1985.06	36	女	汉	四川南充	GXPX	2021.11.23	深圳	右IDC	0.8	0.9	1+	0.2	Luminal B Her-2阴	1.3cm	pT1N2M0，IIIA	5/21	2	2021.12.10 右MRM；EC	无	无	时间过短
208	21B17241707	RAD50	c.298A>G	p.Met100Val	Missense	意义未明变异	1975.08	44	女	汉	湖南郴州	GXPX	2019.10.11	深圳	右IDC	0.8	0.2	-	0.4	Luminal B Her-2阴	1.8cm	pT1N0M0，IA	0/5	2	2019.11.05 右BCT+SLNB；TC*4
															左DCIS	—	—	3+	0.2	Her-2 阳性型	3cm	pTisN0M0，0期	0/3	高级别	2021.12.21 左全切+SLNB；待化疗	双乳癌	无
209	19B3187790	PALB2	c.2360C>T	p.Thr787Ile	Missense	意义未明变异	1980.02	41	女	汉	广东梅州	GXPX	2021.12.23	深圳	IDC	0.9	0.9	2+	0.1	Luminal A	2.6cm	pT2N0M0，IIA	0/4	2	2021.12.29 右全切+SLNB；待化疗	无	无	时间过短
210	21B17241707	RAD50	c.298A>G	p.Met100Val	Missense	意义未明变异	1975.08	44	女	汉	湖南郴州	GXPX	2019.10.11	深圳	IDC	0.8	0.2	—	0.4	Luminal B Her-2阴	1.8cm	pT1N0M0，IA	0/5	2	2019.11.05 右BCT+SLNB；TC*4	无	无	时间过短
211	外院报告	—	—	—	—	—	1987.07	33	女	汉	广东惠州	GXP2	2021.01.23	深圳	IDC	—	—	3+	0.5	Her-2 阳性型	1.3cm	cT2N1M0 IIB；ypCR	0/5	2	2021.02.22 NAC：TCbPH*6;2021.06.23 右BCT+SLNB	无	舅舅肝癌；表哥肝癌；奶奶81岁乳腺癌	时间过短
212	21B05019139	ATM	c.6101G>A	p.Arg2034Gln	Missense	意义未明变 异	1970.11	49	女	汉	广东深圳	GXP2	2020.05.10	深圳	IDC	0.9	0.9	1+	0.1	Luminal A	1.5cm	pT1N0M0,IA	0/5	2	2020.05.28 右BCT+SLNB；后续治疗未知	无	无	无（2022.01.06）
		BRCA1	c.3596C>T	p.Ala1199Val	Missense	意义未明变 异
213	19B0227907	—	—	—	—	—	1959.09	59	女	汉	云南西双版纳	GXPX	绝经	深圳	导管内乳头状癌	0.9	0.8	1+	0.1	Luminal A	1.2cm	pTisN0M0，0期	0/2	低级别	2019.05.28 左MRM+SLNB	无	无	无（2020.05.19）
214	19B0336846	—	—	—	—	—	1964.11	53	女	汉	内蒙古安盟	GXP1	2018.05.14	深圳	IDC	0.8	0.03	-	0.05	Luminal B Her-2阴	1.5cm	pT1N1M0，IIA	2/19	2	2018.09.06 左BCT+SLNB	无	大舅贲门癌；五舅直肠癌；外公食管癌	无（2021.07.06）
215	19B3187931	BARD1	c.1479A>C	p.Gln493His	Missense	意义未明变异	1970.01	49	女	汉	河南开封	GXPX	2019.07.22	深圳	IDC	0.7	0.1	3+	0.25	Luminal B Her-2阳性	4cm	cT2N0M0 IIA;ypT2N0M0 IIa期	0/5	2	2020.07.24 TCbPH*6；2020.11.25 行左全切+SLNB；术后T-DM1	无	无	无（2021.12.13）
		TMEM127	c.670T>C	p.Tyr224His	Missense	意义未明变异
216	20B2446960	—	—	—	—	—	1971.02	49	女	汉	广西桂林	GXP1	2020.02.10	深圳	IDC	0.9	0.2	-	0.4	Luminal B Her-2阴	2.5cm	cT2N1M0 IIB	3/17	2	2020.02.26 NAC:ddEC*4→T*4；2020.08.20 左MRM；	无	无	无（2021.12.07）
217	17B0015380	—	—	—	—	—	1968.02	36	女	汉	湖北武汉	GXPX	未绝经	深圳	IDC	0.7	0.6	-	0.25	Luminal B Her-2阴	1.5cm	cT1N1M0 IIa期；	11/23	3	2001.10.22 左MRM；TAC*6	无	无	17年后发现复发转移
218	18B3965520	—	—	—	—	—	1964.08	52	女	汉	广东海丰	GXP1	2016.05.13	深圳	IDC	40%%	0.2	1+	0.1	Luminal A	2.5cm	pT2N2M0 IIIA	5/12	2	2016.11.21 左MRM；ddEC*4→T*4；	无	无	2021.3年左胸壁复发
219	19B3187729	—	—	—	—	—	1982.02	37	女	汉	湖北荆州	GXP1	2019.07.29	深圳	IDC	0.9	0.9	1+	0.1	Luminal A	3cm	pT2N0M0，IIA	0/5	2	2019.09.04 右BCT+SLNB；TC*4	无	无	无（2021.12.24）
220	19B3187962	MSH2	c.2386A>G	p.Thr796Ala	Missense	意义未明变异	1976.11	44	女	汉	广东湛江	G1P1	2021.04.01	深圳	IDC	-	-	1+	0.5	TNBC	1.5cm	pT1N1M0	0/3	3	2021.04.06 右BCT+SLNB；ddEC*4→T*4；	无	无	无（2021.12.13）
221	19B3187963	—	—	—	—	—	1970.12	49	女	汉	广东河源	GXP1	48岁绝经	深圳	ILC	—	—	3+	0.2	Her-2阳性型	4cm	cT2N3M0，IIIC；ypCR	0/5	3	2020.08.19 TCbPH*6；2020.12.29 左BCT+SLNB	无	无	无（2021.10.18）
222	21B05019143	APC	c.868A>G	p.Ser290Gly	Missense	意义未明变异	1979.08	41	女	汉	广东珠海	GXPX	子宫切除术后绝经	深圳	IDC	0.9	0.8	1+	0.02	Luminal A	1cm	pT1N0M0,IA	0/5	3	2021.04.27 右BCT+SLNB；TC*4	无	父亲胃癌	无（2021.12.17）
		NTHL1	c.815+10T>G	—	Splice	意义未明变异
223	18B3190558	CDH1	c.1296C>G	p.Asn432Lys	Missense	意义未明突变	1982.03	37	女	汉	广东揭阳	GXPX	2020.04.13	深圳	IDC	0.9	0.7	1+	0.1	Luminal A	1.2cm	pT1N0M0，IA	0/5	2	2020.12.24 左BCT+SLNB；TC*4；放疗；内分泌	无	无	无（2021.12.03）
224	18B3976326	MUTYH	c.608G>C	p.Arg203Pro	Missense	意义未明突变	1971.04	50	女	汉	广东河源	GXP1	已绝经	深圳	IDC	0.8	0.7	1+	0.2	Luminal B Her-2阴	0.8cm	pT1N0M0,IA	0/4	3	2021.01.14 右BCT+SLNB；TC*4	无	无	无（2021.12.23）
225	18B4015547	—	—	—	—	—	1963.03	58	女	汉	广东珠海	GXPX	已绝经	深圳	IDC	—	—	—	0.4	TNBC	1.2cm	pT1N0M0,IA	0/3	3	2020.08.02 左全切+SLNB；ddEC*4→T*4	无	无	无（2022.01.16）
226	18B4028409	—	—	—	—	—	1982.02	37	女	汉	湖南岳阳	GXP1	2020.10.14	深圳	IDC	0.7	0.1	3+	0.25	Luminal B Her-2阳性	4cm	cT2N0M0 IIA;ypT2N0M0 IIa期	0/5	2	2020.07.24 TCbPH*6；2020.11.25 行左全切+SLNB；术后T-DM1	无	无	无（2021.12.13）
227	18B4065817	BRCA1	c.5339T>C	p.Leu1780Pro	Missense	已知致病变异	1981.12	39	女	汉	广东梅州	GXP1	2021.05.17	深圳	IDC	—	—	—	0.4	TNBC	1.3cm	pT1N0M0，IA	0/7	3	2021.11.08 左全切+SLNB；术后化疗	无	母亲诊断胰腺癌	时间过短
228	18B4015546	BRCA1	EX23 DEL	—	Deletion	已知致病突变	1983.02	38	女	汉	广西阳朔	GXP1	2020.04	深圳	IDC	—	—	—	0.6	TNBC	1.5cm	pT1N0M0，IA	0/4	3	2021.10.22 左BCT+SLNB；2021.11.4 ddAC*4→T*4	2018年诊断卵巢癌；腹腔镜手术切除双侧输卵管	母亲及小姨乳腺癌	无（2022.01.06）
229	18B4154357	NBN	c.1336G>A	p.Ala446Th	Missense	意义未明突变	1983.01	36	女	汉	广东梅州	G2P1	2021.03.04	深圳	DCIS	0.9	0.7	1+	0.1	Luminal A	2.8cm	TisN0M0，0期	0/3	中级别	2021.12.01 左乳全乳切+SLNB；TC*4	无	无	时间过短
230	18B3971563	ATM	c.1402_1403delAA	p.Lys468Glufs*18	Frameshift	已知致病突变	1996.05	25	女	汉	湖北荆门	G0P0	2021.12.24	深圳	IDC	—	—	—	0.4	TNBC	0.6cm	CT1N0M0 IA期	0/3	3	2021.10.22 左BCT+SLNB；2021.11.4 ddAC*4→T*4	无	母亲41岁诊断乳腺癌	时间过短
		BRCA1	c.3770_3771delAG	p.Glu1257GlyfsX9	Frameshift	已知致病突变
231	18B4154361	BRCA2	c.8951C>G	p.Ser2984Ter	Nonsense	已知致病突变	1965.04	45	女	汉	广东深圳	GXP1	2021.09.12	深圳	DCIS	0.8	0.7	1+	0.05	Luminal A	—	TisN0M0，0期	0/3	低级别	2021.10.28 右全切+SLNB；他莫昔芬*5年	无	姐妹先证者，为BRCA2突变的乳腺癌患者	无（2022.01.06）
232	18B4154359	BRCA2	c.8951C>G	p.Ser2984Ter	Nonsense	已知致病突变	1965.04	47	女	汉	广东深圳	GXP1	2019.08.14	深圳	DIC	0.9	0.7	1+	0.1	Luminal A	1.2cm	pT1N0M0,IA	0/4	3	2019.11.08 左全切+SLNB；术后化疗	无	妹妹45岁患乳腺癌	无（2021.12.25）
233	19B0101932	—	—	—	—	—	1959.09	59	女	汉	广东深圳	GXPX	绝经	深圳	导管内乳头状癌	0.9	0.8	1+	0.1	Luminal A	1.2cm	pTisN0M0，0期	0/2	低级别	2019.05.28 左MRM+SLNB	无	无	无（2020.05.19）
234	19B3187920	BRCA1	c.5239C>T	p.Gln1747*	Nonsense	已知致病突变	1967.04	54	女	汉	广东深圳	GXP2	绝经	深圳	DCIS	—	—	—	0.8	TNBC	1.4cm	pTisN0M0，0期	0/2	高级别	2021.12.28 左BCT+SLNB；术后治疗不详	无	妈妈45岁乳腺癌	时间过短
235	20B2446961	MUTYH	c.55C>T	p.Arg19*	Nonsense	已知致病变异	1971.07	44	女	汉	广东深圳	G3P2	2019.01.21	深圳	IDC	0.4	0.6	3+	0.4	Luminal B Her-2阳性	1cm	pT1N1M0，IIA	2/18	2	2015.2.4 左全切+SLNB+ALN；AC*4→TH*4；曲妥珠*1年；放疗；托瑞米芬→依西美坦+OFS	无	无	无（2021.03.03）
236	20B2446955	BLM	c.2515A>G	p.Lys839Glu	Missense	意义未明突变	1985.09	31	女	汉	广东龙川	GXP0	2017.03.22	深圳	IDC	0.8	0.8	—	0.1	Luminal A	1.0cm	pT1N0M0，IA期	0/4	1	2017.4.5 右全切+SLNB；TC*4；他莫昔芬*5年	无	姑姑脑癌	无（2020.03.09）
237	21B05019140	BRCA2	c.4593dupA	p.Val1532Serf s*2	Frameshift	已知致病变 异	1985.11	35	女	汉	江西南昌	GXPX	2021.05.31	深圳	IDC	0.7	0.6	—	0.08	Luminal A	1.1cm	pT1N1M0，IIA	1/17	2	2020.6.17 右BCT+ALN；EC*4→T*4；内分泌治疗	无	父亲 66 岁诊断肝细胞癌	无（2021.12.03）
		TSC1	c.-144+1G>T	—	SpliceDon or	疑似致病变 异
238	21B05019129	RAD50	c.2686A>G	p.Thr896Ala	Missense	意义未明变 异	1998.07	23	女	汉	广东深圳	GXP0	2021.07.28	深圳	IDC	0.6	0.3	—	0.15	Luminal A	3cm	TisN0M0，0期	0/4	2	2021.09.06 右全切+SLNB；	无	母亲 44 岁诊断乳腺癌	无（2020.03.08）
239	21B17241709	PALB2	c.3059A＞G	p.Gln1020Arg	Missense	意义未明变异	1989.08	32	女	汉	广东茂名	GXP2	2021.12.19	深圳	IDC	0.9	0.3	1+	0.6	Luminal B Her-2阴		cT2N0M0 IIA	0/4	2	2021.09.06 右全切+SLNB；	无	无	时间过短
240	17B0015380	—	—	—	—	—	1979.11	42	女	汉	广东揭阳	GXPX	2021.12	深圳	DCIS	—	—	0.2	0.2	TNBC	2cm	TisN0M0，0期	0/5	中至高级别	2021.12.27 左全切+SLNB；术后内分泌治疗	无	无	时间过短
241	21B17241708	—	—	—	—	—		67					52岁绝经		浸润非特殊	阴	阴	2	0.2	TNBC	1.4cm	p T1N0M0	0/1	2	2021.08.12左根治性保乳切除术+SLNB，术后TC化疗	无	无	无（2021.11.13）
242	21B17241710	—	—	—	—	—		42					2021.12.14		DCIS	阴	阴	2	0.2	TNBC	2.0cm	p Ti s N0M0	0/1	中至高	2021.12.27 左全切+SLNB；术后未在我院治疗	无	无	无（2022.01.07）
243	21B17241713	PALB2	c.110G>A	p.Arg37His	Missense	意义未明突变		43					不详		浸润非特殊+导管原位癌	0.95	阴	1+	0.05	Luminal B Her-2 阴性型	4.5cm	ypT1N2M0	6/26	中	术前化疗，2022.01.13左全切+腋窝淋巴结清扫	无	无	无（2022.01.21）
244	21B17241714	—	—	—	—	—		36					2021.08.12		DCIS	0.9	阴	3+	不详	Luminal B	不详	ypTisN0M0	0/28		术前化疗，2022.01.14左全切+腋窝淋巴结清扫	无	无	无（2023.08.16）
245	21B17241716	—	—	—	—	—		41主管医生陈观玲					2021.12.25		浸润非特殊	0.8	0.7	1+	0.3	Luminal A	2.8cm	pT2N3M0	19/27	2	2022.01.18左全切+腋窝淋巴结清扫	无	无	无
246	21B17241719	MUTYH	c.934-2A>G (-)		SpliceAcceptor	意义未明突变		32					不详		DICS	0.9	0.9	1+	0.1	Luminal A	1.5cm			中	2022.02.10左根治性保乳	无	无	无（2022.02.07）
247	21B17241718	PMS1	c.2755C>T	p.Arg919Cys	Missense	意义未明突变		35					2022.01.02			阴	阴	3+	0.1	Her-2 阳性型					2022.02.10左全切+SLNB	无	父肝癌	无（2022.08.18）
248	21B17241723	MSH6	c.1037C>G	p.Ser346Cys	Missense	意义未明突变		31					2021.01.22		浸润非特殊	0.9	0.9	0+	0.05	Luminal A	0.8cm	pT1N2M0	0/22	1	2022.02.14右全切+腋窝淋巴结清扫+EC化疗	无	无	无（2022.07.27）
249	21B17241724	EPCAM	EX4_7 DEL		Deletion	疑似致病突变		39					2022.01.22		浸润非特殊	0.7	0.9	0+	0.2	Luminal A	1.5cm	PT1N1M0	1/18	2	2022.02.11左全切+腋窝淋巴结清扫+T	无	无	无（2022.05.28）
250	21B17241725	—	—	—	—	—		41					2021.1		浸润非特殊	0.8	0.4	2+	0.05	Luminal A	2.0cm	YCT1N2M0	13/26	2	2022.02.14右改良根治+放疗	无	无	无（2022.07.08）
251	21B17241728	BRCA1	c.3205C>G	p.Gln1069Glu	Missense	意义未明突变		无
252	19B3187793	—	—	—	—	—		40					2022.03.15		浸润非特殊	0.9	0.9	2+	0.05	Luminal A	2.0cm	p T1N0M0	0/1	2	2022.04.02左保乳+SLNB	无	父肺癌，奶奶肝癌	无（2022.04.07）
253	21B17241731	RAD51D	c.932T>A	p.Ile311Asn	Missense	意义未明突变		41					2023.03.22		浸润非特殊+DICS	0.9	0.9	1+	0.1	Luminal A	1.5cm		0.4	2		无	无	无（2022.08.01）
254	21B17241730	MDH2	c.885+14C>T		SpliceAcceptor	意义未明突变		39					2022.03.18		浸润非特殊+DICS	0.9	0.9	2+	0.1	Luminal A	3.0cm	p T2N3M0	12/26	2	2022.04.19左乳腺癌全切+SLNB	无	无	无（2022.05.16）
255	21B17241732	EPAS1	c.1802A>C	p.His601Pro	Missense	意义未明突变		33					2022.04.09		浸润非特殊+DICS	0.95	0.95	1+	0.15	Luminal A	2.3cm	pT2N1M0	1/15	2	2022.04.18右全切+SLNB	无	外公肠癌	无（2022.08.25）
256	21B17241734	BRCA1	c.5239C>T	p.Gln1747*	Nonsense	已知致病突变		36					2022.04.25		浸润非特殊	—	—	—	0.8	TNBC	—	ypT0N1M0	1/31	3	新辅助化疗+2022.09.27左全切+腋窝淋巴结清扫	无	无	无（2022.10.08）
257	19B3187794	—	—	—	—	—		43					2022.04.15		浸润性小叶	0.9	0.95	1+	0.05	Luminal A	2.7cm	pT2N0M0	0/1	2	2022.04.29保留乳晕右全切+SLNB	无	无	无（2022.12.12）
258	21B17241735	BRCA1	c.3327_3329delAAA	p.Lys1110del	Deletion	意义未明突变		49					2021.09.20		浸润非特殊	0.9	0.2	2+	0.9	Luminal B	1.5cm	pT1N0M0	0/2	2	2022.04.25左全切+SLNB	无	3年前右乳癌	无（2023.04.24)
259	19B3187796	—	—	—	—	—		41					—		DICS	—	—	1+	0.6	TNBC	—	ypCR	0/18	3	新辅治疗+2022.05.06右改良根治	无	无	无（2022.09.29）
260	19B3187797	ATM	c.5177+3G>A	—	SpliceAcceptor	意义未明突变		30							DICS	—	—	3+	0.4	Her-2 阳性型	0.9cm	ypT1N0M0	0/7		新辅助化疗+2022.06.09左全切+左SLNB	无	无	无（2023.01.11）
261	19B3187798	—	—	—	—	—		28					2022.04.20		乳头湿疹样癌	0.3	未查	3+	0.3	不详	不详	不详	未清扫淋巴结		2022.05.30右全切	无	母乳腺癌	无（2022.06.08）
262	19B3187800	MUTYH	c.934-2A>G	—	SpliceAcceptor	意义未明突变		45
263	19B3187803	—	—	—	—	—		48
264	19B3187802	EPCAM	c.483T>A	p.Ser161Arg	Missense	意义未明变异		44					2018.08.01		浸润非特殊	—	—	—	0.6	TNBC	2.4cm	T2N0M0	0/2	3	2018.08.30右保乳+SLNB	无	无	无（2022.12.08）
265	21B17241739	RAD51C	c.934C>T	p.Arg312Trp	Missense	疑似致病变 异		32					2022.05.15		浸润非特殊	—	—	—	0.5	TNBC	0.4cm	ypT1N0M0	0/2	2	新辅助化疗+2022.08.18右保乳+SLNB	无	无	无（2022.08.22）
266	21B17241740	—	—	—	—	—		43					2022.08.01		DICS	0.8	0.8	1+	0.02	Luminal A	0.4cm	不详	0/1		2022.08.18右全切	无	大姨，二姨女儿乳腺癌	无（2022.09.07）
267	21B17241741	BRCA2	c.6826C>A	p.Pro2276Thr	Missense	意义未明变异		47					42绝经		浸润非特殊	0.9	0.05	1+	0.2	Luminal B Her-2 阴性型	2.2cm	pT2N0M0	0/1	3	2023.06.21左全切+SLNB	无	无	无（2023.06.27）
268	21B17241742	—	—	—	—	—		33					2022.03.16		浸润非特殊	0.9	0.8	1+	0.1	Luminal A	4cm	c T1N0M0	0/1	2	2022.04.11左保乳+SLNB	无	无	无（2022.06.22）
269	21B17241743	MUTYH	c.53C>T	p.Pro18Leu	Missense	意义未明变异		39					不详		DICS	—	—	0+	0.05	TNBC		ypT0N0M0	0/1	2	新辅助化疗+2022.10.17右保乳+SLNB	无	姐姐乳腺癌	无（2023.04.16）
270	21B17241744	STK11	c.17C>G	p.Pro6Arg	Missense	意义未明变异		50					不详		DICS	0.9	0.6	2+	不详	Luminal A	0.5cm	PT is N0M0	未清淋巴结	2	2018.01.27右乳钙化灶切除术+放疗	无	无	无（2018.03.12）
271	21B17241745	BRCA2	c.6997_6998d elGT	p.Val2333Thrf s*6	Frameshift	已知致病变异		71					男性		浸润非特殊	0.9	0.9	2+	0.5	Luminal A	2.0cm	pT1N1M0	2/41	3	2022.09.14右改良根治	无	无	无（2023.01.17）
272	21B17241746	—	—	—	—	—		38					2022.06.20		浸润非特殊	—	—	—	0.8	TNBC	1.6cm	ypT1N0M0	0/15	3	新辅助化疗+2022.09.29右改良根治	无	无	无（2022.10.26）
273	21B17241747	MRE11A	c.1318G>A	p.Ala440Thr	Missense	意义未明变异		35					2022.09.16		浸润非特殊+DICS	0.95	0.95	—	0.1	Luminal A	1.9cm	pT1N0M0	0/2	2	2022.09.30右保乳+SLNB	无	无	无（2022.12.25）
274	21B17241748	BRCA1	c.981_982del AT	p.Cys328*	Nonsense	已知致病变异		39					2022.06.15		浸润非特殊	—	—	1+	0.6	TNBC		ypT0N1M0	1/15		新辅助化疗+2022.10.11左改良根治	无	无	无（2022.12.27）
275	21B17241749	BRCA2	c.9106C>G	p.Gln3036Glu	Missense	意义未明变异		42					2022.10.07		浸润非特殊	0.9	0.9	——	0.2	Luminal A	1.2cm	pT1N0M0	0/6		2022.11.01左全切	无	小姑妈乳腺癌+大姑妈肠癌	无（2023.01.31）
276	21B17241750	BRCA2	c.5839C>T	p.Pro1947Ser	Missense	意义未明变异		55					不详		浸润非特殊	0.9	0.1	1+	0.05	Luminal B Her-2 阴性型	0.6cm	pT1N0M0	0/3		2022.11.08左乳肿物切除术	无	无	无（2022.11.20）
277	19B3187965	PALB2	c.3114-1G>A	—	SpliceAcce ptor	已知致病变异		65					45绝经		浸润非特殊	—	1+	—	0.6	TNBC	2.5cm	PT2N1M0	2/18		2021.01.04左改良根治+SLNB	无	无	无（2023.03.09）
278	19B3187967	—	—	—	—	—		55					不详		浸润非特殊+DICS	—	—	3+	0.2	Her2阳性	0.7cm	pT1N0M0	0/7		2018.10.08右乳保乳术+SLNB	无	3年前左乳改良根治	无（2019.11.25）
279	19B0104852	BRCA2	c.1871C>T	p.Ala624Val	Missense	意义未明突变		68					46绝经		浸润非特殊	0.95	—	—	0.35	Luminal B Her-2 阴性型	1.5cm	pT1N2M0	3/12	2	2019.04.02右乳改良根治	无	无	无（2021.06.04）
280	19B0199257	BRCA2	c.2870del	p.Asn957Ilefs *3	Frameshift	已知致病突变		46					2019.09.16		浸润非特殊+DICS	0.8	0.8	1+	0.25	Luminal A	0.2cm	pT2N0M0	0/4	2	2019.11.29左全切+SLNB	无	无	无（2020.02.12）
281	19B0333220							30					2019.07.20		浸润非特殊+DICS	0.9	0.52	2+	0.2	Luminal A	2.0cm	pT1N0M0	0/5	2	2019.08.22左全切+SLNB	无	母亲乳腺癌	无（2019.12.15）
282	18B4028410							70					51岁绝经		浸润非特殊	不详	不详	不详	不详	不详	不详	T2N0M0	不详		2018.02外院切除右乳+术后化疗	无	无	无（2018.08.01）
283	19B3187754							60					已绝经		浸润非特殊+DICS	0.9	0.85		0.05	Luminal A	0.3cm	不详	0/22	2	2019.01.14右副乳扩大切除+右腋窝淋巴结清扫	无	无	无（2020.08.27）
284	20B2446956	—	—	—	—	—		63					55岁绝经		浸润非特殊	—	—	—	0.8	TNBC	3.5cm	pT2N0M0	0/3	3	2020.05.22左乳全切+SLNB+化疗	无	无	无（2020.11.10）
285	21B05019124	BRCA2	c.8401_8403delinsAAAA	p.Phe2801Lysfs*11	Frameshift	已知致病变异		34					2021.05.25		浸润非特殊	0.9	0.7	2+	0.2	Luminal A	不详	cT2N1Mx	1/15	2—3	新辅助化疗+2021.08.04左保乳	无	无	无（2021.08.10）
286	19B3187814	BRCA1	NM_007294. 3	c.2572C>T	p.Gln858*	已知致病变 异		31					2023.05.13		浸润非特殊	—	—	1+	0.9	TNBC	不详	pT1N0M0	0/4	3	2023.06.09左保乳+SLNB	无	无	无
287	19B3187816	STK11	(NM_000455. 4)	c.*16+16G>C	-	意义未明变 异		43					2023.05.31		DICS	0.3	0.1	1+	0.2	TNBC	3.0cm	CT1N0M0	0/3	2	2023.06.19右根治性+SLNB	无	姑妈表姐乳腺癌	无
288	21B17241755	ATM	(NM_000051. 3)	c.2434A>G	p.Met812Val	意义未明变异		47					不详		浸润非特殊	0.9	0.9	1+	0.15	Luminal A	1.1cm	pT1cN0M0	0/3	1	2023.02.22左全切+SLNB	无	无	无
289	21B17241756	未检出已知致病或疑似致病突变						36					2023.03.10		浸润非特殊	0.8	0.6	3+	0.35	Luminal A	全切	YCT2N1M0	10/22	2	2023.07.06右乳全切+SLNB	无	无	无
290	21B17241757	BRCA1	(NM_007294. 3)	c.5068A>C	p.Lys1690Gln	意义未明变 异		51					2022.09.16		浸润非特殊	0.9	0.9	1+	0.4	Luminal A	2.5cm	CT2N2M0	0/3	3	2022.10.10右保乳+SLNB	无	姐姐乳腺癌	无
291	21B17372362	BRCA2	(NM_000059. 3)	c.1600G>A	p.Glu534Lys	意义未明变 异		53					不详		浸润非特殊	0.8	0.2	1+	0.05	Luminal B Her-2 阴性型	1.5cm	ypT1N3M0	7/13	2	2023.03.06左保乳+腋清	无	无	无
292	21B17372364	未检出已知致病或疑似致病突变						48					不详		浸润非特殊	—	—	1+	0.8	Her2阳性	未切	CT1N3M1			新辅助化疗	无	无	无
293	21B17372365	PMS1	(NM_000534. 4)	c.1873A>G	p.Thr625Ala	意义未明变 异		44					2023.03.05		浸润非特殊	—	—	2+	0.6	TNBC	4cm	YCT2N1M0	13/19	2	新辅助+2023.07.19右全切+腋窝清扫	无	无	无
294	21B17372366	未检出已知致病或疑似致病突变						30					2023.02.24		浸润非特殊	10%,1+	—	1+	0.7	Her-2 阳性型	不详	pT2N0M0	0/4	3	2023.03.02左保乳+SLNB	无	无	无
295	21B17372367	未检出已知致病或疑似致病突变						40					2023.03.15		浸润非特殊	0.8	0.9	1+	0.1	Luminal A	1.5cm	CT1N0M0	0/4	1	2023.03.30左右保乳+SLNB	无	无	无
296	21B17372369	BRCA2	NM_000059. 3)	c.7088A>G	p.Tyr2363Cys	意义未明变 异		47					2022.12.10		浸润非特殊	—	—	—	0.7	TNBC	不详	ypCR	0/5	3	新辅助+2023.03.17左保乳+SLNB	无	无	无
297	21B17372370	BRCA1	NM_007294. 3)	c.4065_4068d elTCAA	p.Asn1355Lysfs*10	已知致病变异		36					2023.02.08		浸润非特殊	0.05	—	1+	0.8	TNBC	未切	CT2NXM0	未切	不详	新辅助	无	无	无
298	22B03465992	未检出已知致病或疑似致病突变						无
299	22B03465993	未检出已知致病或疑似致病突变						43					2023.03.20		浸润非特殊	—	—	0+	0.8	TNBC	不详	CT1N0M0	0/3	不详	新辅助+2023.08.21右保乳+SLNB	无	无	无
300	22B03465999	未检出已知致病或疑似致病突变						33					不详		浸润非特殊	—	—	3+	0.6	TNBC	未切	CT2N0M0	未切	不详	新辅助	无	无	无
301	22B03466000	BRCA1	NM_007294. 3)	c.3574_3575d elCC	p.Pro1192Phe fs*26	疑似致病变 异		26					2023.05.09		浸润非特殊	—	—	1+	0.8	Her2阳性	未切	CT2N2M0	未切	不详	新辅助	无	无	无
302	22B03466001	MSH2	NM_000251. 2)	c.2395_2397d elAAT	p.Asn799del	意义未明变 异		41					2023.05.16		浸润非特殊	0.8	0.6	1+	0.1	Luminal A	4.5cm	pT2N0M0	0/4	2	2023.06.02右根治切除+SLNB	无	无	无
303	22B03466004	RAD50	NM_005732. 3	c.2165_2166i nsT	p.Lys722Asnf s*6	已知致病变 异		44					2023.06.24		浸润非特殊	—	—	—	0.8	Her2阳性	1.3cm	pT1N0M0	0/4	3	2023.07.24右保乳+SLNB	无	无	无
304	22B03466005	BRCA1	NM_007294. 3	c.80+9G>C		意义未明变 异		39					2023.07.23		浸润非特殊	0.9	0.8	1+	0.1	Luminal A	1.4cm	CT1N0M0	0/3	2	2023.08.03右保乳+SLNB	无	无	无
305	23B05879464	ATM	(NM_000051. 3)	c.6679C>T	p.Arg2227Cys	已知致病变 异		37					2023.07.10		浸润非特殊	0.9	0.9	1+	0.2	Luminal A	不详	CT1N0M0	0/4	2	2023.08.09左保乳+SLNB	无	无	无
306	23B05903858	BRIP1	NM_032043. 2	c.305A>G	p.Gln102Arg	意义未明变 异		46					不详		浸润非特殊	—	—	1+	0.5	TNBC	1.2cm	pT1N0M0	0/4	2	2023.06.16左保乳+SLNB	无	无	无
307	23B05903859	MUTYH	NM_001128 425.1	c.74G>A	p.Gly25Asp	意义未明变 异		50					不详		浸润非特殊	0.3	0.05	3+	0.2	Luminal B Her-2 阳性型		ypTisN0M0	0/17	2	新辅助+2023.06.21右保乳+腋清	无	父亲妹妹均乳腺癌	无
308	23B05903860	MSH2	NM_000251. 2	c.2785C>T	p.Arg929*	意义未明变 异		56					51岁绝经		DICS	—	—	3+	0.05	Her2阳性	3.5cm	pTisN0M0	0/3	2	2023.06.15右全切+SLNB	无	2010左乳腺癌	无
309	23B05903861	MLH1	(NM_000249. 3	c.117-10G>A		意义未明变 异		57					50岁绝经		浸润非特殊	0.9	—	0+	0.4	Luminal B Her-2 阴性型	1.7cm	pT1N0M0	0/3	2	2023.06.19右保乳+SLNB	无	姐姐乳腺癌	无
310	23B05903862	ATM	NM_000051. 3	c.283C>A	p.Gln95Lys	意义未明变 异		无
311	23B05903863	BRIP1	NM_032043. 2	c.1343G>A	p.Trp448*	已知致病变异		33					2023.06.20		DICS	0.4	0.1	3+	0.3	Her-2 阳性型	3.0cm	不详	0/3	3	2023.07.13左全切+SLNB	无	无	无
312	23B05903864	PMS2	NM_000535. 6	c.1850C>G	p.Pro617Ar g	意义未明变异		54					不详		DICS	0.95	0.4	2+	0.1	Luminal B Her-2 阴性型	1.8cm	PT is N0M0	0/3	2	2023.07.04右全切+SLNB	无	无	无
313	19B3187806	CDK12		c.28A>C		意义未明变异
		MRE11A	周松华	c.1500+15T>G		意义未明变异
314	19B3187807	MUTYH	谢艳玲	c.934-2A>G		意义未明变异		45							浸润性非特殊	-	-	-	0.2	TNBC	1cm	ycT1N0M0	0/5	2	2022.10.29表柔比星+环磷酰胺4次 ，2022.12.30紫杉醇+卡铂4次，2023.03.23左保乳+前哨淋巴结活检
315	19B3187808	BRCA2	卓宝深	c.7007G>T		疑似致病变 异		35							80%浸润非特殊癌，20%粘液癌	90%/90%	10%/20%	1+/1+	30%/10%		4✘2✘1	pT2N2M0	7/17	3	2023.04.10右全乳切除+腋窝淋巴结清扫，2023.04.27EC4次，2023.06.27PTX4次
316	19B3187809	MSH6	陈燕	c.2712T>G		意义未明变异		52							浸润非特殊	0.8	0.05	1+	0.1		0.9✘0.6✘0.5	pT1N0M0,Ia期	0/6	2	2023.04.07右保乳+前哨淋巴结活检，2023.04.26TC4次		两个姐姐乳腺癌
317	19B3187810	BRCA1	姜海晶	c.3296delC		已知致病变 异		47							浸润非特殊/中高导管原位癌	-/50%	-/10%	-/1-2+	30%/60%		0.7	cT1N0M0	0/4	2/中-高级别	2023.04.18左保乳+前哨淋巴结活检术
		BRIP1		EX5_6 DEL		已知致病变 异
318	19B3187811		洪平香	本次基因检测中，未检出已知致病或疑似致病突变。
319	19B3187812	MSH6	何葵英	c.1090G>C		意义未明变异		57							浸润非特殊	-	-	3+	0.1	her2阳		ypT0N0M0	0/5	新辅助治疗	2023.05.16多西他赛+卡铂+HP6次，2023.09.21行左乳癌全切+腋窝淋巴结清扫术20231013HP8次		姐姐患子宫癌+直肠癌，弟患肝癌，妹患卵巢癌
		NF1		c.3030A>C		意义未明变异
320	21B17241754	BRCA1	唐惠玉	c.4148C>G		已知致病变 异		60							浸润非特殊癌	-	-	1+	0.8		1.5✘1.2✘1	cT1N0M0 Ia期	0/3	3	2023.02.22左保乳+活检，2023.03.15TC6次，2023.08.03放疗
321	21B17372363	ATM	李美婉	c.4776+15A>C		意义未明变异		50							右浸润性非特殊/左浸润性非特殊	80%/80%	90%/90%	-/-	30%/20%		2.1✘1.7✘2/1.6✘1.5✘1	右pT2N3M0 IIIC/左pT1N1M0IIA	右16/24左1/16	左2右2	2023.02.14双乳癌全切+双腋清，2023.03.07EC4次，2023.05.04P4次，2023.06.20放疗
		SMARCA4		c.719C>T		意义未明变异
322	21B17372368		徐莹	本次基因检测中，未检出已知致病或疑似致病突变。
323	22B03466003	BRCA2	何惠琴	c.9106C>G		意义未明变异		47							左浸润非特殊+高级别原位癌	0.9	0.9	-	0.6	pT1N0M0 I期	1✘0.6	luminal B Her阴性	0/5	2	2023.07.14左乳癌+前哨淋巴结活检，2023.08.16TC6次		父亲肺癌
		CDK12		c.1382A>G		意义未明变异
324	22B27384619	MUTYH	庄秀容	c.53C>T		意义未明变异		41							导管原位癌	0.95	0.1	1+	0.01	cT1N0M0 IA		luminal A型	0/5	低级别	2023.08.10右全切+前哨淋巴结活检术，2023.09.02TC4次
		MUTYH		c.74G>A		意义未明变异
325	22B27384620		戴逢香	本次基因检测中，未检出已知致病或疑似致病突变。
326	22B27384622		李群珍	本次基因检测中，未检出已知致病或疑似致病突变。
327	22B27384623	BRCA1	潘会	c.134+1G>T		已知致病变 异		30							浸润非特殊癌	-	-	-	0.6	TNBC		cT2N1M0 IIb期 TNBC	0/6	新辅助治疗后	2023.09.06紫杉醇脂质体+卡铂4次，2023.09.30替雷利珠单抗，2023.09.12帕博利珠单抗，2023.12.01EC4次，2024.02.29右全切+活检术，帕博利珠单抗2次
328	22B27384624	BRCA1	罗志英	c.3596C>T		意义未明变异		51							浸润非特殊/原位癌	80%/80%	90%/90%	1+/1+	70%/60%	luminalB her2阴性型		pT2N1M0 IIB期	3/19	2	2023.08.29左保乳+腋窝淋巴结清扫术		弟结直肠癌
329	22B27384625	BRCA2	李小鹤	c.8773C>T		已知致病变 异		40							浸润非特殊/导管原位癌	0.8	0.05	2+	0.3			pT2N1M0 IIB	3/17	2/中-高级别	2023.09.04右全切+腋窝清扫术，2023.09.26EC4次，2023.11.28HPT4次，2024.03.08放疗
330	22B27384626		郭丽文	本次基因检测中，未检出已知致病或疑似致病突变。
331	22B27384627		JUE WANG	本次基因检测中，未检出已知致病或疑似致病突变。
332	22B27384628		姜延艳	本次基因检测中，未检出已知致病或疑似致病突变。
333	22B27384629	ATM	梁小珩	c.8805G>A		意义未明变异		60							浸润非特殊/原位癌	90%/90%	90%/90%	3+/3+	20%/20%			pT1N0M0 Ia期	0/3	3	2020.08.25右乳癌+前哨淋巴结活检，2020.09.10TH治疗
334	22B27384630	MUTYH	龙汉妮	c.74G>A		意义未明变异		37							浸润性非特殊癌	0.15	0.05	3+	0.1			ypT0N0M0	0/2	2	2023.3.17 TCHP多西他赛，卡铂6次，2023.07.18左保乳+活检术，2023.08.11HP10，
		MUTYH		c.53C>T		意义未明变异
335	23B04076786	BRCA1	缪筱笳	c.5072C>A		疑似致病变 异	2022.10.20右全切+活检术	33							浸润性非特殊癌	-	-	+	0.4			ypT0N0M0	0/3	2	2023.08.25紫杉醇脂质体+卡铂4，2023.08.30帕博利珠单抗7，2023.11.20EC4，2024.02.06行右保乳+活检，2024.02.28帕博利珠单抗2次			母亲乳腺癌，父亲肺癌
336	23B05117703	BRCA2	刘静	c.7069_7070delCT		已知致病变 异		39							低级别导管原位癌	0.9	0.9	-	0.03		0.2		0/3	低级别
337	23B05400388	CHEK2	廖梅娜	c.755G>A		意义未明变异		57							浸润性非特殊癌	-	-	+	0.3		4.2	cT4N0M1 IV期		3	2022.04.17左乳全切，2023.04.07EC6次姑息性化疗，2023.03.31发现左胸壁转移和双肺转移
338	23B05893107	PALB2	钟述碧	c.315G>C		意义未明变异		44							浸润非特殊癌	-	-	0.9	0.3		5✘3.5✘2	pT1N0M0 IA期	0/3	2	2023.06.20左乳全切癌+活检术，2023.06.28TCH4次，2023.09.20H8次
339	23B05893108		叶小兰	本次基因检测中，未检出已知致病或疑似致病突变。
340	23B07178985	NF1	李文文	c.655-15G>C		意义未明变异		37							浸润非特殊癌	0.9	0.9	1+	0.3		2.4✘2✘1.5	pT2N1M0 IIB luminalA型		2	2023.08.15左乳保乳+前哨活检，2023.09.19TC6次化疗
341	22B27384631	BRCA2	李欣琳	c.5164_5165d		已知致病变 异		25							浸润性非特殊癌	0.8	-	0.6	0.6		1.7	pT1N0M0 I期	0/4	浸润非特殊未分，中级别	2023.10.10右保乳+前哨淋巴结活检，2023.10.24EC4次，2023.12.26单药PTX4次
342	22B27384632		刘立立	本次基因检测中，未检出已知致病或疑似致病突变。
343	22B27384634		程龙焕	本次基因检测中，未检出已知致病或疑似致病突变。
344	22B27384635		余美芳	本次基因检测中，未检出已知致病或疑似致病突变。
345	22B27384636		苏金妹	本次基因检测中，未检出已知致病或疑似致病突变。
346	22B27384637	BRIP1	冉啟玲	c.1442G>A		意义未明变异		37							浸润非特殊癌	0.95	0.1	0.3	0.4		2.2	pT2N0M0 IIa期，luminal B1	0/5	2	2023.10.20右乳根治+前哨活检术，2023.11.18多西他赛+环磷酰胺6次
347	22B27384638		胡良花	本次基因检测中，未检出已知致病或疑似致病突变。
348	22B27384640	BRCA1	李惠贞	c.5467+1G>A		已知致病变 异		41							右乳浸润性导管癌，左乳浸润性非特殊癌	-/-	-/-	+/+	左70%		2.5✘2.0✘1.5		0/18	未分级	2008.12.17右乳改良根治术，2023.11.15行AC多柔比星脂质体，环磷酰胺4次，2024.02.06TCb4次，2024.04.26左乳保乳+腋窝淋巴结清扫，			既往右乳癌
349	22B27384642		杨小香	本次基因检测中，未检出已知致病或疑似致病突变。
350	23B07602611		刘君	本次基因检测中，未检出已知致病或疑似致病突变。
351	23B07637993	RAD50	黄冰	c.214G>A		意义未明变异		50							双侧浸润性非特殊癌	90%/	0.7	1+	0.1				左4/16	左2/右导管中级别	2023.01.19左乳癌改良根治+右乳癌全切+右淋巴结活检，2023.02.15行EC4疗程
		RAD50		c.3931G>A		意义未明变异
352	23B07734169		林丽君	本次基因检测中，未检出已知致病或疑似致病突变。
	23B07919189	MC1R	林景葵	c.497C>G		意义未明变异		31							浸润性非特殊癌	0.9	0.2	1+	0.1		1.7✘1.5✘1.3	pT1N0M0 Ia期	0/1	2	2023.11.06左保乳,2023.12.07TC4次			奶奶有结肠癌
		PMS2		c.883C>T		意义未明变异
353	23B07919190	BRCA2	罗丽娜	c.2744C>G		意义未明变异		60							浸润性非特殊癌	0.9	0.3	0.3	0.3		1.8✘1.5✘1.3	pT1cN0M0 I期	0/6	2	2020.10.29左乳全切+前哨活检术
		CDH1		c.1018A>G		意义未明变异
		EXT2		c.107C>T		意义未明变异
		RB1		c.1861C>A		意义未明变异
354	23B07919191	MSH2	张小杰	c.2005+18T>G		意义未明变异		60							浸润非特殊癌	0.8	2+	0	0.15		1.2	pT1aN0M0 Ia期	0/3	2	2023.11.22左全切+前哨
355	23B07919192		樊子名	本次基因检测中，未检出已知致病或疑似致病突变。
356	23B07919193	BARD1	徐快飞	c.1309A>G		意义未明变异		46							浸润非特殊癌	-	-	3+	0.6			ypT0N0M0	0/4	未查到	2023.7.21TCHP6次，2023.11.20右全切,2023.12.15H5次
		EPCAM		c.298G>A		意义未明变异
		MRE11A		c.107C>T		意义未明变异
357	23B07919194	RAD51D	代梦	c.620C>T		疑似致病变 异		40							浸润非特殊癌	0.8	0.1	1+	0.05		2.0✘1.2✘1.2	pT2N0M0 IIa期	0/3	1/中级别	2023.11.23左全切+活检术
358	23B07919196		聂馨	本次基因检测中，未检出已知致病或疑似致病突变。
359	23B07919197	ATM	刘荣	c.8921C>T		意义未明变异		50							浸润非特殊癌	0.9	0.9	0	0.1		1.3✘1.1✘0.7	cT1N0M0 Ia期	0/4	2	2023.11.28左保乳+前哨活检
		BRCA2		c.695A>G		意义未明变异
		MSH6		c.3801+4T>C		意义未明变异
		RAD50		c.424A>G		意义未明变异
360	23B07919198		钟玲	本次基因检测中，未检出已知致病或疑似致病突变。
361	23B07919199		蔡小梅	本次基因检测中，未检出已知致病或疑似致病突变。
362	23B07919200		邹芬	本次基因检测中，未检出已知致病或疑似致病突变。
363	23B07919201	RAD50	张亮	c.3931G>A		意义未明变异		44							浸润非特殊癌	-	-	0	0.4			cT2N0M0 IIa期		未分级	2023.11.10EC4次，2024.01.09Tcb4次
364	23B07919202	BRIP1	陆丽珠	c.2440C>T		意义未明变异		38							浸润非特殊癌	0.8	0.9	0.9	0.1		1.5✘1.2✘0.8	ypT1N0M0	0/4	2	2023.06.27EC4次，2023.08.27T4次，2023.12.18行左乳全切+前哨活检术
		NBN		c.1912T>C		意义未明变异
365	23B07919203		彭英	本次基因检测中，未检出已知致病或疑似致病突变。
366	23B07919204	NF1	孙树娜	c.7241G>A		意义未明变异		40							浸润非特殊癌	-	-	1+	0.4					3	2024.01.13紫杉醇紫脂体+卡铂+帕博珠单抗4次，2024.04.09 EC帕博珠单抗2次，2024.05.22优替德隆，卡培他滨，帕博利珠单抗1次
367	23B07919205		曾艳君	本次基因检测中，未检出已知致病或疑似致病突变。
368	23B07919206	EPCAM	朱岩	c.250C>T		意义未明变异		43							中级别原位癌	0.9	0.9	2+	0.3		2.1✘2.1✘1.5	pTisN0M0 0期	0/4	中级别	2023.12.25腔镜辅助下保留乳头乳晕的右乳癌根治+假体置入+活检
		MUTYH		c.74G>A		意义未明变异
		MUTYH		c.53C>T		意义未明变异
369	23B07919207	BRCA1	方育君	c.5194-2A>G		已知致病变 异		34							浸润性非特殊癌	-	-	-	80		新辅助后，无残留	cT2N0M0 IIA期 三阴	0/3	3	2024.01.29替雷利珠单抗，2024.02.20行5次紫杉醇脂质体，卡铂，替雷利珠单抗
370	23B08205873		张冬兰	本次基因检测中，未检出已知致病或疑似致病突变。
371	23B08205874		李露	本次基因检测中，未检出已知致病或疑似致病突变。
372	23B08205875	PALB2	丘晓晶	c.2474G>C		意义未明变异		33							浸润非特殊癌	0.8	0.8	2+	0.3		1.5✘1.3✘1.1	pT1N0M0 Ia期	0/4	2	2024.04.23左保乳+前哨活检术，2024.05.21 TC1次	姐姐和堂姐乳腺癌
373	23B08205879	BRIP1	马爽	c.1794+3A>C		意义未明变异		42							浸润非特殊癌	-	-	1+	0.7		2.7✘2✘1.4	pT2N0M0 IIa期	0/3	3	2024.04.11左保乳+前哨活检术，2024.05.07EC3次
374	23B08205880	BRCA2	潘丽君	c.8642delC		已知致病变 异		39							浸润非特殊癌	0.1	0.15	1+	0.1		1.4✘1.0✘0.7	pT1N1M0 IIA luminal B	2/14	2	2024.04.17右乳全切+前哨活检术，2024.05.11EC2次	二姨和妈妈乳腺癌
375	23B08205881		熊丹	本次基因检测中，未检出已知致病或疑似致病突变。
376	23B08205882	MUTYH	薛远飞	c.934-2A>G		意义未明变异		38							浸润癌	0.9	-	2+	0.4		3.5✘2.0✘2.0	pT1aN1miN0 IIa luminal B	1/21	高级别	2024.03.28左乳全切+腋窝清扫，2024.04.20EC4次
		SMARCA4		c.665C>T		意义未明变异
		XPC		c.105T>A		意义未明变异
377	23B08205883	SMARCA4	陈苏娜	c.4382G>A		意义未明变异		38							浸润非特殊癌	0.7	0.8	3+	0.4			ypT0N0M0	0/3	新辅助	2023.11.4EC4次，2023.12.29THP4次，2024.03.15左全切
378	23B08205885	CDK12	颜比美	c.2960C>T		意义未明变异		57							浸润非特殊导管癌	-	-	1+	0.6		2.7✘2.2✘2	ypT2NxM0	0/20	3	2023.11.11EC4次，2024.01.06紫杉醇脂质体，卡铂，替雷利珠单抗4次
379	23B08205886	BRCA2	翁新雨	c.5682C>G		已知致病变 异		27							浸润非特殊癌	0.95	0.1	0.6	0.1		4✘2✘1.5	ypT2N1M0	3/18	2	新辅助后，2024.03.11左全切+腋窝清扫术，2024.05.23放疗
380	23B08205889	PMS2	邹芳	c.299A>C		意义未明变异		45							浸润非特殊癌	0.8	0.9	3+	0.6		1.2✘0.8✘0.5	ypT1N1M0 IIa	2/26	3	2023.10.18TcbHP6次，2024.02.23左保乳+腋窝清扫术，
381	23B08205890	PMS2	廖燕翔	c.1582G>A		意义未明变异		61							左乳导管原位癌，右导管原位癌	左2%,右2%	左-右-	左2+右3+	左20%右5%			TisN0M0 0期		高级别	2024.03.04双乳全切+活检术	两个姐姐乳腺癌
382	23B08205891		曹坤洁	本次基因检测中，未检出已知致病或疑似致病突变。
383	23B08205892		黄慧君	本次基因检测中，未检出已知致病或疑似致病突变。
384	23B08205893	BRCA2	董黎	c.6486_6489delACAA		已知致病变 异		38							浸润微乳头状癌	0.7	0.3	1+	0.3		1.2✘1.1✘0.9	pT1N2M0 IIB期	4/19	3	2024.02.29左保乳+腋窝清扫术，2024.03.18EC4次，2024.05.18紫杉醇2次
385	24B04401436	BRCA2	赖素华	c.695A>G		意义未明变异		35							浸润非特殊癌	0.8	0.05	1+	0.15		1.6✘1.2✘1	pT1cN0M0 I期 luminal B Her2阴	0/5	2	2024.02.05右全切+活检术，2024.02.27TC5次
		RAD50		c.661T>C		意义未明变异
386	23B08205852		黄美婵	本次基因检测中，未检出已知致病或疑似致病突变。
387	23B08205853	BRCA2	夏明明	c.2122T>A	p.Ser708Thr	意义未明变 异		27							导管原位癌	80	30	2+	20		5X2.5x1.5	导管原位癌	0/3	中级别	2024.06.28行腔镜辅助下保留乳头乳晕右乳癌根治性皮下腺体全切+假体置入+活检术
388	23B08205854		苏英	本次基因检测中，未检出已知致病或疑似致病突变。
		MUTYH		c.53C>T	p.Pro18Leu	意义未明变 异
		MUTYH		c.74G>A	p.Gly25Asp	意义未明变 异
389	23B08205856		庄梦君	本次基因检测中，未检出已知致病或疑似致病突变
390	23B08205857	BRIP1	王倩	c.1018C>T	p.Leu340Phe	意义未明变 异		45							浸润性非特殊癌	80	60	0	10		1.7x1.3x1	pT1N1M0 IIA期	1/4	2	2024.07.02行右乳癌根治性全切+腋窝淋巴结清扫术，2024.07.23行TC化疗6次	母亲乳腺癌
		PALB2		c.2360C>T	p.Thr787Ile	意义未明变 异
		PMS2		c.139C>G	p.Leu47Val	意义未明变 异
391	23B08205858	NF1	李珊珊	c.4955A>G	p.Asn1652Ser	意义未明变 异		40							乳腺导管原位癌	70	50	30/2+	3		1.2x1.2x0.7	cT1cN0M0 Ia期	0/5	中-高级别	2024.05.16腔镜辅助下右乳癌根治皮下腺体切除术+活检术+假体置入
392	23B08205859	BRIP1	吴淑珍	c.1343G>A	p.Trp448*	已知致病变 异		52							浸润性非特殊癌	-	-	1+	30		3.5x2.5x2	pT2N0M0 IIA期	0/4	3	2024.06.06右乳癌根治性保乳切除+前哨活检术，2024.06.25行EC3疗程，2024.08.06行P化疗3疗程	2023子宫内膜癌
393	23B08205861	ALK	吴国平	c.1780C>T	p.Gln594*	意义未明变 异		39							浸润性非特殊癌	90	40	2+	50		穿刺病理	pT2N0M0 IIA期		穿刺病理无组织学分级		2008年行右乳癌保乳+前哨淋巴结活检术
		CHEK2		c.497A>G	p.Asn166Ser	意义未明变 异
		PRSS1		c.623G>C	p.Gly208Ala	意义未明变 异
394	23B08205862	BRCA1	黄丽娟	c.3870dupA	p.Cys1291Me tfs*4	已知致病变 异		26							浸润性非特殊癌	-	-	0	60		1.5x1x1	pT1N0M0 IA期	0/5	3	2024.05.28左乳癌+前哨活检术，2024.06.21EC4疗程，2024.08.16T化疗3次
		MUTYH		c.74G>A	p.Gly25Asp	意义未明变 异
		MUTYH		c.53C>T	p.Pro18Leu	意义未明变 异
395	23B08205864		刘艳伟	本次基因检测中，未检出已知致病或疑似致病突变
396	23B08205870	CHEK2	吴秀霞	c.755G>A	p.Ser252Asn	意义未明变 异		69							浸润性非特殊癌	-	-	-	80		1.8x1.4x0.9	ypT1N0M0 IA期，三阴型	0/3	3	2023.12.21行AC4疗程，2024.03.15行Tcb4疗程，2024.06.06左乳癌保乳+前哨活检术
397	23B08205871	BRCA1	李小东	c.5153-2A>G		已知致病变 异		33							浸润性非特殊癌	2+	-	0	40		2x1.5x1.3	pT1N0M0 IA期	0/3	3	2024.08.01左乳癌保乳+活检术，2024.08.23EC4疗程，2024.10.23P疗程2次，即紫杉醇脂质体
398	23B08205872		郑晓芳	本次基因检测中，未检出已知致病或疑似致病突变
399	24B08163321	MSH6	贺红亮	c.1937A>G	p.Lys646Arg	意义未明变 异		40							浸润性非特殊癌	80	40	1+	35		1.2	pT1aN0M0 IA期 luminal B her2阴性	0/3	2	2024.08.13左保乳+前哨淋巴活检
		MUTYH		c.53C>T	p.Pro18Leu	意义未明变 异
		MUTYH		c.74G>A	p.Gly25Asp	意义未明变 异
400	24B08163322	CHEK2	李洁茹	c.538C>T	p.Arg180Cys	意义未明变 异		55							浸润性非特殊癌	90	60	2+	40		1.7x1.5x1.5	pT1N0M0 IA期，luminal B her2阴	0/3	2	2023.12.25不保留乳头乳晕的右乳癌根治性保乳+前哨活检术	母亲结肠癌
		PMS2		c.452G>A	p.Arg151His	意义未明变 异
401	24B08163323		林映苑	本次基因检测中，未检出已知致病或疑似致病突变。
402	24B08163324	NBN	卢克娜	c.1275A>C	p.Arg425Ser	意义未明变 异		37							浸润性癌	-	-	3+	40		穿刺病理	cT2N0M0 IIA期 Her2过表达型		2	2024.09.06TCbHP化疗3疗程
403	24B08163325	MSH2	周涛	EX2_5 DUP		意义未明变 异		46							浸润性非特殊癌	60	-	1+	30		0.4	ycT1N0M0 IA期	0/4	3	2024.4.20EC4疗程，2024.6.18TCb4疗程即PTX+卡铂
404	24B08163326	ATM	李彩霞	c.7089+19C> G		意义未明变 异		43							浸润性非特殊癌	-	-	1+	90			pT2N0M0 IIA期	0/3	3	2024.09.10左乳癌根治性保乳+前哨淋巴结术
		MSH2		c.1690A>G	p.Thr564Ala	意义未明变 异
405	24B08163327	CDK12	肖雨	c.3760+12G> A		意义未明变 异		36							浸润性非特殊癌	90	70	2+	25		2.3x1.5x0.8	ypT2ypN2M0	8/18	2	2024.05.2 表柔比星+环磷酰胺，2024.05.20 表柔比星+环磷酰胺3次化疗，2024.07.07 P 4次化疗，2024.09.05腔镜右乳癌根治性皮下全切+假体置入+清扫术
406	24B08163328		植坤文	本次基因检测中，未检出已知致病或疑似致病突变。
407	24B08163329	NF1	范文鑫	c.6859G>A	p.Asp2287As n	意义未明变 异		29							浸润性非特殊导管癌	70	40	3+	30			ypT1ypN0M0 luminalB HER2阳性		2	2024-06-13多西他赛+卡铂+曲妥珠+帕妥珠单抗，2024.10.28右乳根治性保乳+腋窝淋巴结清扫术	外公胃癌，外婆结肠癌
		SDHB		c.709C>T	p.Pro237Ser	意义未明变 异
408	24B08163330		江智珣	本次基因检测中，未检出已知致病或疑似致病突变
409	24B09434145	SMARCA4	陈顺燕	c.602A>T	p.Gln201Leu	意义未明变 异		42							浸润性癌	90	80	10	10		1.2x1x1	pT1N0M0 IA期，luminal A	0/3	2	2024.02.05左乳癌根治性保乳+前哨淋巴结活检，2024.03.09多西他赛+环磷酰胺4疗程

## Sheet: 阳性
1	19B3187756	蒋彩	1.5cm	BRCA1	c.5239C>T	p.Gln1747*	Nonsense	已知致病突变	00549560	1970.08	49	女	汉	湖北武汉	13925200891	GXP1	2019.09.15	深圳	右IDC	—	—	—	0.7	TNBC	1.5cm	pT1N0M0，IA	0/3	3	2019.12.26 右BCT+SLNB；TCb*4；2020.5.28 预防性右侧全切	2012.左乳癌行MRM，T1.5cm，1/15；ET*1→3EC→T*4	姐姐乳腺癌；母亲肝癌；父亲肺癌	无（2020.05.27）
		双乳癌	1.0cm																左IDC	—	0.02	—	未知	Luminal B	1.0cm	pT1N1M0，IIA	1/15	未知
2	19B3187926	张长娣	ypT0cm	BRCA1	c.4372C>T	p.Gln1458*	Nonsense	已知致病变 异	00955445	1967.11	52	女	汉	广东河源	15919761836	GXPX	50岁绝经	深圳	IDC	—	—	—	0.6	TNBC	ypT0cm	cT2N0M0，IIA；ypCR	0/5	3	NAC:TCb*6 q3w；2021.1.25 左全切+SLNB	2020.8.5 双侧附件：卵巢高级别癌 IIIA期→全子宫切除+卵巢切除	无	无（2021.07.21）
3	19B3187952	江莉	1.5cm	BRCA1	c.3294delT	p.Pro1099Leu fs*10	Frameshift	已知致病变异	00971713	1986.05	34	女	汉	江西赣州	18929309179	G5P3	2020.10.14	深圳	IDC	0.1	0.05	0.2	0.8	Luminal B Her-2阴性	1.5cm	pT1N0M0，IA	0/5	3	2020.11.3 左BCT+SLNB；EC*4→TCb*4；卡瑞丽珠单抗；2021.6.3 行预防性双侧附件切除	无	2个姑姑卵巢癌	无（2021.07.06）
				SPINK1	c.194+2T>C	—	SpliceDonor	已知致病变异
				PALB2	c.2360C>T	p.Thr787Ile	Missense	意义未明变异
4	19B3002290	陈慈	未知	BRCA1	c.4327C>T	p.Arg1443*	Nonsense	已知致病变 异	01007089	1991.03	30	女	汉	安徽	13823780887	GXP0	2021.04.28	深圳	IDC	—	0.01	—	0.6	Luminal B Her-2阴性	1.5cm	pT1N0M0，IA	0/5	3	外院 MRM	无	母亲36岁胰腺癌去世；舅舅白血病去世；外公胃肠癌	未知
5	19B3002299	周莹	PT1.7cm	BRCA1	c.1214C>A	p.Ser405*	Nonsense	已知致病变异	01025074	1980.12	40	女	汉	安徽阜阳	13480660953	GXPX	2021.08.20	深圳	IDC	—	—	—	0.3	TNBC	PT1.7cm	pT1N0M0，IA	0/4	3	2021.09.01 左BCT+SLNB；2021.09.10 ddEC*4→T*4；放疗	无	无	无（2021.12.20）
6	21B17241691	刘艳霞	1.5cm	BRCA1	c.4097-1G>A	—	SpliceAcce ptor	已知致病变异	01033725	1976.11	44	女	汉	湖北荆州	15019254445	GXPX	2021.09.16	深圳	IDC	—	—	—	0.6	TNBC	1.5cm	pT1N0M0，IA	0/4	3	2021.10.22 左BCT+SLNB；2021.11.4 ddAC*4→T*4	无	舅舅 50 岁诊断肝细胞癌	时间过短
7	21B17241700	李莉	1.3cm	BRCA1	c.5339T>C	p.Leu1780Pro	Missense	已知致病变异	01011256	1973.1	47	女	汉	广东梅州	13544001233	GXP1	2021.05.17	深圳	IDC	0.85	0.7	—	0.4	Luminal B Her-2阴	1.3cm	pT1N0M0，IA	0/7	3	2021.06.21 左BCT+SLNB；TC*4；OFS+AI	无	母亲诊断胰腺癌	时间过短
8	18B4065817	阮从兰	1.3cm	BRCA1	c.5339T>C	p.Leu1780Pro	Missense	已知致病变异	01014255	1981.12	39	女	汉	广东梅州	13744881235	GXP1	2021.05.17	深圳	IDC	—	—	—	0.4	TNBC	1.3cm	pT1N0M0，IA	0/7	3	2021.11.08 左全切+SLNB；术后化疗	无	母亲诊断胰腺癌	时间过短
9	18B4015546	刘琴	1.5cm	BRCA1	EX23 DEL	—	Deletion	已知致病突变	00938473	1983.02	38	女	汉	广西阳朔	13834521143	GXP1	2020.04	深圳	IDC	—	—	—	0.6	TNBC	1.5cm	pT1N0M0，IA	0/4	3	2021.10.22 左BCT+SLNB；2021.11.4 ddAC*4→T*4	2018年诊断卵巢癌；腹腔镜手术切除双侧输卵管	母亲及小姨乳腺癌	无（2022.01.06）
10	19B3187920	蒋青秀	Tis	BRCA1	c.5239C>T	p.Gln1747*	Nonsense	已知致病突变	00963726	1967.04	54	女	汉	广东深圳	13713806868	GXP2	绝经	深圳	DCIS	—	—	—	0.8	TNBC	Tis	pTisN0M0，0期	0/2	3	2021.12.28 左BCT+SLNB；术后治疗不详	无	妈妈45岁乳腺癌	时间过短
11	19B3187701	向华	1cm	BRCA1	c.5056C>G	p.His1686Asp	Missense	疑似致病变异	00192363	1975.09	46	女	汉	重庆	13509656689	GXP1	2021.09.18	深圳	IDC	—	—	—	0.4	TNBC	1cm	pT1N0M0，IA	0/3	3	2021.10.18 右BCT+SLNB；dEC*4→T*4；	无	姐姐 45 岁诊断乳腺癌	时间过短
12	18B3971563	张莉虹	0.6cm	ATM	c.1402_1403delAA	p.Lys468Glufs*18	Frameshift	已知致病突变	01002549	1996.05	25	女	汉	湖北荆门	13927424245	G0P0	2021.12.24	深圳	IDC	—	—	—	0.4	TNBC	0.6cm	CT1N0M0 IA期	0/4	3	2021.09.06 右BCT+SLNB；dEC*4→T*4；	无	母亲41岁诊断乳腺癌	时间过短
				BRCA1	c.3770_3771delAG	p.Glu1257GlyfsX9	Frameshift	已知致病突变
13	19B3187916	周秀珍	2cm	BRCA1	c.212G>A	p.Arg71Lys	Missense	已知致病突变	00934409	1971.07	48	女	汉	湖北黄冈	13480841219	GXP1	2020.02.25	深圳	IDC	0.1	0.1	1+	0.5	Luminal B Her-2阴性	2cm	pT1N0M0，IA	0/4	3	2020.3.10 左全切+SLNB；TC*6；内分泌治疗	无	姐姐49岁乳腺癌（BRCA+）；母亲49岁乳腺癌（BRCA+）；外婆乳腺癌	无（2021.03.04）
1	18B4154359	姜知音	1.5cm	BRCA2	c.8951C>G	p.Ser2984Ter	Nonsense	已知致病突变	00546504	1971.05	47	女	汉	江西南昌	13823262681	GXP1	2018.10.02	深圳	IDC	—	—	—	0.3	TNBC	1.5cm	pT1N0M0，IA	0/7	3	2018.11.16 右全切+SLNB；EC*4→T*4	2018.12.18 胸前红斑切除 术后：浅表型基底细胞癌	妈妈、小姨、姐姐均为乳腺癌（姐姐45岁发病 测基因BRCA2致病突变）	无（2021.08.10）
2	18B4159505	李雪梅	2cm	BRCA2	c.3109C>T	p.Gln1037Ter	Nonsense	已知致病突变	00833166	1974.12	43	女	汉	湖北赤壁	15818538675	G1P0	2018.06.25	深圳	IDC	—	—	—	0.6	TNBC	2cm	pT1N0M0，IA	0/5	3	2018.7.16 左BCT+SLNB；EC*4→T*4；放疗*20次；预防性切除双侧附件	无	妹妹乳腺癌	无（2021.04.21）
3	19B3002257	冯春红	4.5cm	BRCA2	c.2870del	p.Asn957Ilefs *3	Frameshift	已知致病突变	00920074	1972.12	46	女	汉	广东阳江	13312944488	GXP2	2019.09.16	深圳	IDC	0.8	0.8	1+	0.25	Luminal B Her-2阴性型	4.5cm	pT2N0M0，IIA	0/4	3	2019.12.2 左乳全切+SLNB；TC*4；内分泌治疗	无	姐姐46岁乳腺癌	无（2021.07.28）
4	19B0104361	方敏华	2.0cm	BRCA2	c.3109C>T	p.Gln1037*	Nonsense	已知致病突变	00880714	1979.04	39	女	汉	广东广州	13632560580	GXP1	2019.03.23	深圳	双IDC	右90%	0.3	—	0.2	Luminal B Her-2阴性型	2.0cm	右pT1N2M0，IIIA	4/14	2	2019.4.22行双乳切+右改良+左SLNB；EC*4→T*4；放疗；戈舍瑞林+阿那曲唑	双乳癌	母亲52岁乳腺癌	无（2019.07.10）
		双乳癌	1.0cm																	左90%	0.05	—	0.2	Luminal B Her-2阴性型	1.0cm	左pT1N0M0，IA	0/5	2
5	19B3187755	项晓君	1.7cm	BRCA2	c.5771_5774delT TCA	p.Ile1924Argf s*38	Frameshift	已知致病突变	00366018	1964.08	55	女	汉	浙江	13600168048	GXPX	50岁绝经	深圳	IDC	0.8	0.1	—	0.3	Luminal B Her-2阴性	1.7cm	pT1N1M0，IIA	2/4	2	2019.12.19 左BCT+SLNB；EC*4→T*4；2020.11.17 预防性全子宫切除+双侧附件切除；放疗；内分泌治疗	无	母亲38岁乳腺癌去世；小姨70岁乳腺癌	无（2021.07.22）
6	19B3187909	袁静	1.5cm	BRCA2	c.5682C>G	p.Tyr1894*	Nonsense	已知致病突变	00390912	1974.09	45	女	汉	重庆	13691778462	GXP1	2020.03.02	深圳	IDC	—	—	3+	0.6	Her-2 阳性型	1.5cm	pT1N0M0，IA	0/3	3	2020.3.19 左全切+SLNB；TC*4；曲妥*1年	2009.右乳癌	无	无（2021.04.23）
		双乳癌
7	19B3187908	陈竹	1.5cm	BRCA2	c.3109C>T	p.Gln1037*	Nonsense	已知致病突变	00929041	1978.05	41	女	汉	重庆	13923725166	G3P1	2019.01.03	深圳	IDC	0.8	0.7	1+	0.3	Luminal B Her-2阴性	1.5cm	pT1N0M0，IA	0/3	2	2020.1.16 左全切+SLNB；TC*4；OFS+AI；2020.8.10 双侧预防性附件切除	无	无（已电联）	无（2021.08.17）
8	19B3187972	李叶英	2.5cm	BRCA2	c.8537_8538delAG	p.Glu2846Gly fs*22	Frameshift	已知致病变异	00615628	1990.09	30	女	汉	湖北武冈	13826570355	GXPX	2021.02.12	深圳	IDC	0.9	0.4	—	0.7	Luminal B Her-2阴性	2.5cm	pT2N1M0，IIB	1/4	2	2021.2.23 右BCT+SLNB；EC*4→T*4；放疗；内分泌*10年	无	姨妈40岁乳腺癌；外婆肝癌；舅舅肝癌	无（2021.07.22）
9	21B05019137	赵智	1.1cm	BRCA2	c.7976+1G>A	—	SpliceDon or	已知致病变 异	01011476	1985.11	35	女	汉	江西南昌	18520805901	GXPX	2021.05.31	深圳	IDC	0.7	0.6	—	0.08	Luminal A	1.1cm	pT1N1M0，IIA	1/17	2	2020.6.17 右BCT+ALN；EC*4→T*4；内分泌治疗	无	无
				MUTYH	c.857G>A	p.Gly286Glu	Missense	已知致病变 异
10	21B05019124	任美玲	2cm	BRCA2	c.8401_8403delinsAAAA	p.Phe2801Lysfs*11	Frameshift	已知致病变异	00998572	1986.12	34	女	汉	天津	15811831083	GXPX	2021.03.16	深圳	IDC	0.9	0.7	—	0.2	Luminal B Her-2阴性	2cm	cT2N1Mx；ypT1N1M0 IIA	1/15	2	2021.4.3 EC *4→T*4 q2w；2021.8.4 左BCT+ALN	无	无
11	21B05019122	肖高华	—	BRCA2	c.6547delG	p.Glu2183Asnfs*8	Frameshift	已知致病变异	00912841	1989.11	29	女	汉	湖北荆州	13631605275	GXP1	2019.09.12	深圳	DCIS	0.8	0.7	1+	0.05	Luminal A	—	TisN0M0，0期	0/3	低级别	2021.10.28 右全切+SLNB；他莫昔芬*5年	无	无	无（2021.08.08）
12	21B17241692	王巍	0.6cm	BRCA2	c.3628_3629delGA	p.Asp1210*	Nonsense	已知致病变异	00497847	1981.12	39	女	汉	广东深圳	13828810506	GXP0	2021.09.21	深圳	左IDC	—	—	—	0.6	TNBC	0.6cm	pT1N0M0，IA	0/7	3	2021.11.08 左全切+SLNB；术后化疗	双乳癌	无	时间过短
		双乳癌																	右IDC	未知	未知	未知	未知	未知					2010.10.26 外院行右MRM 术后ddAC*4→T*4；放疗35次
13	18B4154361	姜知非	—	BRCA2	c.8951C>G	p.Ser2984Ter	Nonsense	已知致病突变	00423234	1965.04	45	女	汉	广东深圳	13456623838	GXP1	2021.09.12	深圳	DCIS	0.8	0.7	1+	0.05	Luminal A	—	TisN0M0，0期	0/3	低级别	2021.10.28 右全切+SLNB；他莫昔芬*5年	无	姐妹先证者，为BRCA2突变的乳腺癌患者	无（2022.01.06）
14	18B4154359	姜知音	1.2cm	BRCA2	c.8951C>G	p.Ser2984Ter	Nonsense	已知致病突变	00428674	1965.04	47	女	汉	广东深圳	13456623838	GXP1	2019.08.14	深圳	DIC	0.9	0.7	1+	0.1	Luminal A	1.2cm	pT1N0M0,IA	0/4	3	2019.11.08 左全切+SLNB；术后化疗	无	妹妹45岁患乳腺癌	无（2021.12.25）
15	21B05019140	赵耀	1.1cm	BRCA2	c.4593dupA	p.Val1532Serf s*2	Frameshift	已知致病变 异	01011476	1985.11	35	女	汉	江西南昌	18520805901	GXPX	2021.05.31	深圳	IDC	0.7	0.6	—	0.08	Luminal A	1.1cm	pT1N1M0，IIA	1/17	2	2020.6.17 右BCT+ALN；EC*4→T*4；内分泌治疗	无	父亲 66 岁诊断肝细胞癌	无（2021.12.03）
				TSC1	c.-144+1G>T	—	SpliceDon or	疑似致病变 异
16	18B4144803	侯秋慧	1.5cm	BRCA2	c.475+2T>C	—	Splice	疑似致病突变	00854244	1980.01	38	女	汉	湖北武汉	13924584060	G1P1	2014（OFS）	深圳	右IDC	0.8	—	—	0.2	Luminal B Her-2阴	1.5cm	pT1N1minM0，IB	微转移1/3	3	2018.11.13 右全切+SLNB；EC*4→T*12；放疗；他莫昔芬+戈舍瑞林；2019.12.3 双侧附件预防性切除	2013 左乳CA行MRM IDC 5/23;	无	无（2021.07.04）
		双乳癌																	左IDC	+	1+	3+	不详				5/23	3	2013年外院行左MRM
1	19B3002256	张小燕	1.5cm	BRCA1	c.212G>A	p.Arg71Lys	Missense	已知致病突变	00922943	1988.07	31	女	汉	浙江杭州	13928495105	GXPX	2019.11.20	深圳	IDC	—	0.05	—	0.7	Luminal B Her-2阴性型	1.5cm	pT1N1M0，IIA	1/19	3	2019.12.30 左MRM；ddEC*4→T*4；内分泌：他莫昔芬	无	姑姑31岁乳腺癌	无（2021.08.18）
				BRCA2	c.7409_7410insT	p.Thr2471His fs*4	Frameshift	已知致病突变
2	19B3187767	陈莹	0.7cm	BRCA1	c.5511G>C	p.Trp1837Cys	Missense	疑似致病突变	00920047	1986.01	33	女	汉	四川成都	13530531887	G0P0	2019.11.08	深圳	IDC	0.95	0.7	1+	0.1	Luminal A	0.7cm	pT1N0M0，IA	0/1	1	2019.12.02 全切+SLNB；术后行21基因检测未化疗；内分泌治疗	无	妈妈33岁乳腺癌	无（2021.05.21）
				BRCA2	c.1454delinsTGT ATT	p.Lys485Metf s*26	Frameshift	疑似致病突变

## Sheet: Sheet2
12	17B0015532	林少锦	RAD51C		c.233C>T	p.Thr78Ile	意义未明突变	00584842	1966.07	50	女	汉	广东深圳	13686817829	GXPX	2017.01.30	深圳	导管内乳头状癌	无	无	无	无	无	无	无	无	缺	2017.3.7 左乳全切	（双乳CA）2013年因右乳癌行右乳全切+SLNB 病理：DCIS	无	无（2021.04.08）
16	17B0051500	方雪梅	CHEK2		c.1037G>T	p.Arg346Leu	意义未明突变	00800503	1973.01	43	女	汉	广东龙川	13620993778	GXP1	2017.11.06	深圳	IDC	未知	未知	未知	未知	未知	未知	未知	未知	未知	2016外院行右全切+SLNB；TC*4 内分泌治疗	无	外婆乳腺癌	（失联）
28	18B0014277	王琳	—	—	—	—	—	00790702	1983.11	33	女	汉	湖北十堰	13925236405	GXP1	2017.09.27	深圳	IDC	—	0.4	1+	0.6	Luminal B Her-2阴	未知	ypCR	0/6	3	NAC;ddEC*4→P*4 q2w；2018.2.12 右BCT+SLNB；放疗；内分泌治疗	无	姐姐53岁乳腺癌	无（2021.07.15）
38	18B4083071	黄彦天	—	—	—	—	—	00842657	1977.12	40	女	汉	湖南浏阳	18676701582	GXPX	2018.08.26	深圳	IDC	0.8	0.8	3+	0.15	Luminal B Her-2阳	未知	cT2N1M0 IIB	未知	未知	2018.9.3 NAC:TEC*2→EC*2→TH*4 拒绝手术	无	无	未手术，2019.1.3复查可见癌灶，未明显转移
39	18B4140007	吴锦珍	—	—	—	—	—	00658727	1974.09	40	女	汉	广东电白	13502868993	GXP1	2015.05.12	深圳	ILC	0.8	0.15	—	0.1	Luminal B Her-2阴	未知	pT1N0M0，IA	0/4	未知	2015.05.29 左BCT+SLNB：TC*4；放疗*28次 内分泌*5年	无	无	无（202007.15）
49	19B3187764	刘美行	—	—	—	—	—	00833609	1989.04	29	女	汉	广东深圳	13926596276	G2P0	2017.10.13	深圳	IDC	1	—	3+	0.6	Luminal B Her-2阳性型	未知	ypT3N3M0，IIIC期	24/24	3	NAC:TCbH*8；2019.1.16 右MRM；赫赛丁+长春新滨+拉帕替尼；内分泌：依维莫司	无	外婆胃癌 50岁	2019.7肝转移 腹腔多发转移 2020.1.16死亡
52	19B3187768	董鸿洋	—	—	—	—	—	00628963	1975.03	44	女	汉	辽宁丹东	18688761036	GXP0	绝经	深圳	DCIS	0.9	0.7	—	0.1	Luminal A	未知	pTisN0M0，0期	未做	低级别	行穿刺后转外院 行右侧全切+假体	2014年左乳癌 后内分泌治疗	姨妈51岁乳腺癌	无（2021.04.21）
56	19B0102112	马玉燕	—	—	—	—	—	00835668	1977.08	40	女	汉	广东汕头	13682699555	GXPX	2018.07.13	深圳	DCIS	0.9	0.9	1+	0.2	Luminal B Her-2阴性型	未知	pTisN0M0，0期	0/2	中级别	2018.7.25 右全切+SLNB；托瑞米芬	无	无	无（2021.02.18）
58	19B0103262	许秋萍	—	—	—	—	—	00860306	1971.09	47	女	汉	广东揭阳	18926511868	GXP1	2018.11.03	深圳	DCIS	0.9	0.9	—	0.15	Luminal B Her-2阴性型	未知	pTisN0M0，0期	0/4	中级别	2018.12.12 左乳全切+SLNB；他莫昔芬*5年	无	母亲48岁宫颈癌	无（2020.12.16）
67	19B0224510	郝雅莉	—	—	—	—	—	00854008	1979.02	39	女	汉	湖南常德	13724262905	GXP2	2018.10.12	深圳	IDC	—	—	—	0.7	TNBC	未知	cT2N1M0，IIB；ypTxN0M0	0/12	3	NAC;ddEC*4→T*12；2019.4.23 右BCT+SLNB；放疗28次	无	姑妈74岁胃癌	无（2021.06.22）
71	19B0281832	陈雪萍	RAD50	c.3790C>T	p.Leu1264Phe	Missense	意义未明突变	00569754	1972.11	41	女	汉	广东深圳	13509613148	GXPX	未知	深圳	IDC	0.9	0.8	—	0.15	Luminal B Her-2阴性型	未知	pT4N0M0，IIIB	0/3	未知	外院 NAC;EC*4；2013.7 左全切+SLNB；术后P*4；我院CIK治疗*10	无	爷爷80岁肝胆癌；奶奶91岁胰腺癌；外婆79岁直肠癌	未知
72	19B0333160	葛建敏	—	—	—	—	—	00718669	1973.06	40	女	汉	福建泉州	18688302038	GXP3	40岁绝经	深圳	IDC	未知	未知	未知	未知	未知	未知	pT1N0M0，IA	0/4	未知	外院 2013年行右BCT+SLNB；FEC*6；放疗	无	无	未知
79	19B3002260	刘师思	—	—	—	—	—	00930602	1983.03	33	女	汉	湖北武汉	13971219872	GXPX	2016.05.04	深圳	IDC	0.6	0.7	3+	0.2	Luminal B Her-2阳性	未知	pT2N1M0，IIB	未知	未知	2016.3.29 外院行左MRM；EC*4→TH*4；PH*1年；戈舍瑞林+他莫昔芬*10年	无	外公前列腺癌	无（2021.02.24）
81	19B3187913	罗慧敏	BRCA2	c.3478A>G	p.Arg1160Gly	Missense	意义未明突变	00901937	1980.11	38	女	汉	广东深圳	13560791530	GXP1	2019.07.20	深圳	IDC	0.8	0.05	3+	0.2	Luminal B Her-2阳性	未知	CT2N1M0，IIB；ypTisN1M0，IIA期	2/28	2	NAC;TCbHP*6;2019.12.30 左BCT+ALN；双靶*1年；卡培他滨？	无	无	无（2021.04.25）
85	19B3187921	刘陆静	NF1	c.6859-16A>T	—	Splice	意义未明突变	00604085	1983.05	34	女	汉	广东陆丰	13751132386	GXPX	2017.07.06	深圳	DCIS	—	0.02	3+	0.25	Luminal B Her-2阳性	未知	TisN0M0，0期	0/1	高级别	2017.8.18 右全切+SLNB；他莫昔芬*5年	无	无	无（2021.05.30）
90	20B2447019	金鑫	MLH1	c.1153C>T	p.Arg385Cys	Missense	意义未明突变	00920027	1986.1	33	女	汉	重庆	15018938691	GXP1	2020.03.24	深圳	IDC	0.8	—	—	0.5	Luminal B Her-2阴性	未知	cT2N2M0，IIIA；ypT1N1M0，IIA	1/20	3	NAC;EC*4→T*4；2020.4.14 左BCT+SLNB；OFS+AI（戈舍瑞林+阿那曲唑）；放疗	无	无	无（2021.03.26）
93	19B3002274	陈笑容	CFTR	c.3205G>A	p.Gly1069Arg	Missense	疑似致病变异	00942829	1969.01	51	女	汉	广东深圳	13554983130	GXP3	2019.11.14	深圳	IDC	—	—	—	0.4	TNBC	未知	未知	未知	未知	NAC:TCb*4→AC*4；外院手术	无	无	无（2021.06.25）
104	19B3187935	卢伟英	CDH1	c.1565C>T	p.Thr522Ile	Missense	意义未明变异	004555106	1970.06	42	女	汉	广东深圳	13682512163	GXP1	2020.07.12	深圳	IDC	0.9	0.4	1+	0.3	Luminal B Her-2阴性	未知	未知	未知	未知	2012 左乳癌（IDC）手术；2014 右乳癌（DCIS）手术	双乳癌	无	2020.08 左乳癌术后胸壁复发
134	19B3002292	喻章霞	—	—	—	—	—	00746373	1979.09	41	女	汉	安徽池州	13662615075	GXP1	2021.03.23	深圳	右IDC	0.5	0.7	3+	0.4	Luminal B Her-2阳性	未知	cT2N0M0，IIA；ypT1N0M0 IA	0/4	未知	2021.4.12 NAC;TCbPH*6;2021.8.11 双乳切+双SLNB；卡培他滨？内分泌*10年	无	无
140	21B05019134	周美玲	—	—	—	—	—	00546035	1987.06	33	女	汉	湖南郴州	13723472002	GXP2	2021.02.15	深圳	IDC	—	—	3+	0.4	Her-2 阳性型	未知	cT2N1M0，IIB；ypT1N0M0 IA	0/4	未知	2021.3.5 NAC: TCbPH*6；2021.7.2 左全切+SLNB；T-DM1 ;	无	父亲51岁食管癌
158	19B3002301	江丽庄	MSH6	c.1063G>A	p.Gly355Ser	Missense	意义未明变异	00703044	1988.08	33	女	汉	广东深圳	13631611250	GXP0	2021.08.26	深圳	IDC	—	0.15	1+	0.6	Luminal B Her-2阴	未知	CT1N1M0，IIA；	未知	未知	2021.10.01 NAC ddEC*4→T*4；准备手术治疗	无	二伯肺癌	时间过短
167	19B3002304	李书丹	—	—	—	—	—	01007055	1983.01	37	女	汉	湖北宜昌	18617033363	GXPX	2021.05.01	深圳	IDC	—	0.2	3+	0.25	Luminal B Her-2阳性	未知	ypCR	0/12	未知	2021.5.26 NAC:TCbHP*6;2021.10.09 左BCT+ALN；	无	无	无（2021.11.19）
168	19B3187700	蔡钰	ATM	c.6067G>A	p.Gly2023Arg	Missense	意义未明变异	01028204	1982.08	39	女	汉	广东汕头	13510856642	GXP0	2021.08.15	深圳	DCIS	0.95	0.95	1+	0.15	Luminal B Her-2阴	未知	TisN0M0，0期	未做SLNB	低级别	2021.09.13 左区段切除术；放疗	无	无	时间过短
147	21B05019123	王燕妮	BRCA1	c.3913G>C	p.Asp1305His	Missense	意义未明变 异	01003051	1982.11	38	女	汉	陕西榆林	13554711156	GXPX	2021.04.14	深圳	IDC	0.9	0.7	1+	0.5	Luminal B Her-2阴性	未手术	cT2N2M1,IV期	未手术	未知	2021.5.2 姑息治疗 EC*4→T*4 q2w	乳腺癌骨转移	无	发现已骨转移
183	21B17241706	陈惠芹	MSH2	c.792+4C>T	—	Splice	意义未明变异	00433556	1969.09	51	女	汉	广东深圳	15018948869	GXPX	绝经	深圳	右IDC	—	—	3+	0.25	Her-2阳性型	未手术	未手术	未手术	3	2021.08.07一线用药 TCbPH	双乳癌；右乳癌伴骨、腋窝及锁骨上淋巴结转移	双乳癌；右乳癌伴骨、腋窝及锁骨上淋巴结转移	双乳癌；右乳癌伴骨、腋窝及锁骨上淋巴结转移
7	17B0014741	王欢	—	—	—	—	—	00738351	1982.03	35	女	汉	江西万载	13725528878	GXP2	2016.10.25	深圳	DCIS	缺	缺	缺	缺	缺	缺	pTisN0M0，0期	0/3	缺	2016.12.02 右全切+SLNB	无	无	无（已联系病人）
8	17B0014742	张若婉	MUTYH		c.74G>A	p.Gly25Asp	意义未明突变	00731405	1987.06	29	女	汉	广东普宁	18898933964	GXP0	2016.12.03	深圳	IDC	0.9	0.8	—	0.1	Luminal A	缺	cT2N1M0，IIA期	1/16	缺	2016在港大NAC:EC *1 TAC*5 2017.2.21 右BCT+ALN 后续未知	无	无	（失联）
9	17B0014743	姜铭艺	MSH6		c.3818A>G	p.Asn1273Ser	意义未明突变	00752337	1980.06	36	女	汉	吉林长春	18620330022	GXPX	2017.01.25	深圳	IDC	0.4	0.3	3+	0.25	LuminalB Her-2阳性型	缺	cT2N1-2M0，IIIB期	0/35	缺	2017.3.16姑息化疗 TCbH*7 （qw）2017.10.16 左BCT+ALN 放疗*25 戈舍瑞林+他莫昔芬	2017.9.18 行肺楔形切除术 （左肺上叶肺硬化性肺泡细胞瘤）	无	无（已联系病人）
161	21B17241682	王春苑	ATM	c.5177+3G>A	—	Splice	意义未明变异	01028786	1984.08	37	女	汉	广东梅州	13411234271	GXPX	2021.08.31	深圳	IDC	—	—	—	0.8	TNBC	还未手术	cT3N0M0 IIIA 期		还未手术	2021.09.17 NAC ddEC*4→T*4；还未手术	无	无	时间过短
164	21B17241688	孙妮	BARD1	c.1495C>A	p.His499Asn	Missense	意义未明变异	01030456	1980.06	41	女	汉	湖北天门	13510230866	GXPX	2021.09.01	深圳	IDC	—	0.3	3+	0.6	Luminal B Her-2阳	还未手术	cT2N1M0 IIB	还未手术	还未手术	2021.09.27 NAC TCbPH*6 还未手术	无	父亲肝癌（去世）	时间过短
174	21B17241694	于顺秀	MSH2	c.2783C>T	p.Ser928Leu	Missense	意义未明变异	00610792	1977.07	44	女	汉	四川达州	13760169248	GXP2	2021.10.07	深圳	IDC	0.9	0.9	3+	0.15	Luminal B Her-2阳	还未手术	cT2N1M0 IIB	还未手术	还未手术	2021.11.18 NAC;TCbHP*6;还未手术	无	无	时间过短
175	19B3187720	邓永来	—	—	—	—	—	01037995	1980.12	40	女	汉	广东河源	13714819039	GXPX	2021.10.28	深圳	IDC	—	—	—	0.6	TNBC	还未手术	cT2N0M0 IIA	还未手术	还未手术	2021.11.10 NAC:ddEC*4→T*4；还未手术	无	无	时间过短
176	19B3187741	梁倩	CDH1	c.602C>T	p.Pro201Leu	Missense	意义未明变异	01040814	1983.05	38	女	汉	吉林白城	15818572567	GXPX	2021.11.15	深圳	IDC	0.8	0.7	3+	0.1	Luminal B Her-2 阳性型	还未手术	cT2N3M0，IIIC；	还未手术	还未手术	2021.12.21 NAC:TCbHP *6;还未手术	无	无	时间过短
182	21B17241705	肖敏	—	—	—	—	—	01043963	1992.05	29	女	汉	广东汕头	13670372759	GXP0	2021.11.18	深圳	IDC	0.8	0.7	3+	0.2	Luminal B Her-2阳	还未手术	CT1N1M0，IIA；	还未手术	还未手术	2021.12.17 TCbPH *6;戈舍瑞林	无	母亲 乳腺癌	时间过短
27	18B0013691	张冠颖	CHEK2	c.417C>A	p.Tyr139Ter	Nonsense	已知致病突变	00776204	1971.05	46	女	汉	辽宁大连	13923832128	GXPX	2017.06.20	深圳	ILC	0.95	0.95	—	0.15	Luminal B Her-2阴	ypT2.5cm	cT3NXM0，III期；ypT2N3M0 IIIC期	26/27	2	2017.08 NAC:EC→T ；2017.12.21 MRM ；2018.1.31 预防性切除双侧附件；未放疗；内分泌治疗	无	无	无（2021.02.03）
29	18B0014570	何素	—	—	—	—	—	00770751	1989.06	28	女	汉	湖北攸县	13828799766	GXP1	2017.05.03	深圳	IDC	0.6	0.6	1+	0.4	Luminal B Her-2阴	ypT2.5cm	cT2N0M0，IIA；ypT2N0M0，IIA	0/5	3	2017.06.16 NAC:EC*4→T*4；右BCT+SLNB；放疗；OFS+托瑞米芬（阿那曲唑+戈舍瑞林）	无	无	无（2021.07.19）
31	18B3190875	朱小云	—	—	—	—	—	00760101	1981.04	36	女	汉	广东汕尾	18675543181	GXP1	2017.03.24	深圳	IDC	—	—	—	0.5	TNBC	ypT2.5cm	ypT2N0M0，IIA	0/5	3	2017.04.13 NAC;ddEC*4→P*4 q2w；2017.8.31 右BCT+SLNB；放疗；卡培他滨？	2014左侧附件畸胎瘤	无	无（2021.05.04）
41	18B4154156	金咸英	RAD50	c.3790C>T	p.Leu1264Phe	Missense	意义未明突变	00811750	1977.12	40	女	汉	湖北江安	13824371282	GXP1	2018.07.14	深圳	IDC	0.05	0.02	1+	0.4	Luminal B Her-2阴	ypT2.5cm	cT3N1M0	0/16	2	NAC:TAC*6；2018.11.13 左MRM；卡培他滨？内分泌治疗	无	无	无（2020.12.09）
57	19B0103111	张凝	CHEK2	c.917G>C	p.Gly306Ala	Missense	疑似致病突变	00852832	1985.04	33	女	汉	黑龙江大庆	18682340595	GXP0	2018.10.06	深圳	IDC	0.9	0.4	—	0.15	Luminal B Her-2阴性型	ypT2.5cm	cT2N1M0，IIB；ypT2N0M0，IIA	0/15	2	NAC:EC*4→T*4；2019.5.28 右MRM；阿那曲唑+亮丙瑞林；卡培他滨？	无	无	2021.6右侧卵巢癌 病理提示乳腺癌转移；盆腔广泛转移
70	19B0280704	薛惠青	MSH6	c.3762A>	p.Glu1254Asp	Missense	意义未明突变	00270300	1967.04	49	女	汉	湖北武汉	13751131239	GXP1	47岁绝经	深圳	IDC	—	—	—	0.4	TNBC	ypT2.5cm	cT2N0M0,IIA；ypT2N0M0，IIA	0/6	2	NAC:ddEC*4→T*4；2019.6.4 右BCT+SLNB；卡培他滨？	无	无	无（2021.04.17）
133	19B3002291	黄晓芳	EPCAM	c.327G>C	p.Gln109His	Missense	意义未明变 异	00981311	1978.07	42	女	汉	广东清远	13510666175	GXP1	2021.03.21	深圳	IDC	0.9	0.5	3+	0.3	Luminal B Her-2阳性	ypT1cm	cT3N2M0 IIIA；ypT1N1M0，IIA	2/12	2	2020.12.25 NAC:ECPH*4 q3w→TPH*4 q2w；2021.5.19 左MRM；PH*1年；内分泌治疗；放疗	无	无	无（2021.08.25）
110	19B3187944	杨从先	NF1	c.7000-15G>T	—	Splice	意义未明变异	00966557	1967.01	52	女	汉	湖北荆州	13797323744	GXP2	49岁绝经	深圳	右IDC	—	—	—	0.4	TNBC	ypT1.5cm	cT2N1M0，IIB；ypT1N0M0 IA	0/15	3	NAC:TCb*6；2021.3.1 右MRM；放疗；卡培他滨	2014 左乳癌行BCT TNBC T:3cm,LN;0/16；TEC*6；放疗	无	无（2021.05.28）
59	19B0103263	黄长青	—	—	—	—	—	00831110	1970.07	47	女	汉	广东海丰	13530001531	GXP2	2018.06.10	深圳	左IDC	0.6	0.3	3+	0.3	Luminal B Her-2阳性型	ypT1.1cm	左ypT1N1M0，IIA；右ypTisN0M0，0期	左2/27+1/3	2	NAC;TCbH*6 qw；H*1年；2018.11.13左MRM+右全切+SLNB；放疗；内分泌治疗	无	无	无（2021.07.27）
65	19B0199258	刘燕嫦	TP53	c.1136G>T	p.Arg379Leu	Missense	意义未明突变	00860725	1973.05	45	女	汉	广东深圳	13622334345	G0P0	2018.11.16	深圳	IDC	0.1	—	3+	0.6	Luminal B Her-2阳性型	ypT1.1cm	cT2N0M0，IIA；ypT1N0M0，IA	0/8	3	NAC:TCbH*6;2019.04.26 右BCT+SLNB；放疗28次	无	无	无（2021.07.14）
98	20S8740230	曾淑娴	—	—	—	—	—	00955154	1985.04	35	女	汉	广东深圳	18666662876	GXP2	2020.07.14	深圳	IDC	—	—	—	0.6	Luminal B Her-2阴性	ypT1.0cm	cT2N0M0，IIA；ypT1N0M0，IA	0/4	3	NAC:EC*4→T*4；2020.11.26 右BCT+SLNB；放疗；卡培他滨？	无	无	无（2021.05.21）
44	18B4159506	李凯璇	MSH2	c.2516A>G	p.His839Arg	Missense	意义未明突变	00771327	1974.01	43	女	汉	广东潮阳	13823357404	GXP0	2017.09.30	深圳	IDC	—	—	—	0.7	TNBC	ypT0cm	ypCR	0/28	未知	ddEC*4→P*12；2017.12.05 左BCT+SLNB；放疗	无	无	无（2021.06.22）
62	19B0104241	鲍禹琴	ATM	c.5762+3A>G	-	Splice	意义未明突变	00871832	1966.04	52	女	汉	河北黄石	13902964662	GXP0	2019.01.28	深圳	IDC	—	—	—	0.7	TNBC	ypT0cm	cT2N0M0，IIA；ypT0M0N0，0期	0/5	未知	NAC:ddEC*4→T*4；2019.7.2 左BCT+SLNB	无	父亲69岁胰腺癌	无（2021.08.09）
92	20B2447020	田小玉	PALB2	c.923C>T	p.Ala308Val	Missense	意义未明突变	00942686	1982.11	37	女	汉	湖南张家界	18003011489	GXP1	2020.04.15	深圳	IDC	0.15	0.05	—	0.6	Luminal B Her-2阴性	ypT0cm	ypT0N0M0	0/4	3	NAC;TCb*4→AC*4；2020.11.10 左BCT+SLNB；TAM*5年	无	无	无（2021.07.07）
106	19B3187941	林吟	STK11	c.566C>T	p.Thr189Ile	Missense	意义未明变异	00943419	1985.12	35	女	汉	安徽芜湖	13530616839	G0P0	2020.04.10	深圳	IDC	—	—	0.1	0.8	TNBC	ypT0cm	cT2N0M0，IIA；ypCR	0/5	未知	NAC:EC*4→T*4；2020.9.15 右BCT+SLNB；放疗	无	无	无（2021.03.17）
116	19B3187951	余芬芬	BRCA2	c.5171T>C	p.Ile1724Thr	Missense	意义未明变异	00971495	1988.08	32	女	汉	江西上饶	13692198852	G0P0	2020.12.19	深圳	IDC	—	1+	—	0.6	Luminal B Her-2阴性	ypT0cm	cT2N0M0，IIA；ypCR	0/5	未知	NAC;2020.10.29 ddEC*4→P*4；2021.2.23 左BCT+SLNB；放疗；	无	无	无（2021.02.21）
119	19B3187957	宿静	—	—	—	—	—	00976199	1978.01	42	女	汉	四川乐山	18666662790	GXP1	2020.10.23	深圳	IDC	—	—	3+	0.6	Her-2 阳性型	ypT0cm	cT3N1M0，IIIA；ypCR	0/15	未知	2020.11.25 TCbHP*6 q21d；2021.4.8 右MRM；双靶*1年；放疗	无	无	无（2021.08.23）
120	19B3187960	周文莉	—	—	—	—	—	00979398	1987.09	33	女	汉	广东湛江	13410087631	GXP0	2020.11.14	深圳	IDC	0.6	0.05	3+	0.4	Luminal B Her-2阳性	ypT0cm	cT2N0M0，IIA；ypCR	0/4	未知	NAC:2020.12.17 TCbHP*6 q21d；2021.4.29 左BCT+SLNB；双靶*1年；放疗；TAM*5年	无	无	无（2021.07.20）
127	21B05019157	骆劭丹	FH	c.259C>T	p.Arg87Cys	Missense	意义未明变异	00376416	1980.11	40	女	汉	广东惠州	13632592902	G4P2	2020.12.18	深圳	IDC	—	0.05	1+	0.7	Luminal B Her-2阴性	ypT0cm	CT1N1M0，IIA；ypCR	0/5	未知	2020.12.4 NAC;EC*4→T*4；2021.4.6 右BCT+ALN；放疗	无	姨妈60岁乳腺癌	无（2021.08.23）
144	21B05019130	陈思杏	PMS1	c.2755C>T	p.Arg919Cys	Missense	意义未明变 异	00991211	1985.01	35	女	汉	广东湛江	13410017671	GXPX	2021.01.24	深圳	IDC	—	0.05	1+	0.6	Luminal B Her-2阴性	ypT0cm	cT2N0M0，IIA；ypCR	0/7	未知	2021.2.21 NAC:EC*4→T*4 q2w；2021.6.28 左BCT+SLNB；放疗；卡培他滨？	无	无
121	19B3187961	赵海冯	—	—	—	—	—	00980218	1983.01	37	女	汉	广东湛江	13570843683	G2P2	2020.12.03	深圳	IDC	0.6	0.6	3+	0.4	Luminal B Her-2阳性	ypT0.8cm	cT2N1M0，IIB；ypT1N0M0 IA	0/4	3	NAC:2020.12.17 TCbHP*6 q21d；2021.4.25 左BCT+SLNB；卡培他滨；双靶*1年；放疗；OFS+AI*5年	无	无	无（2021.08.06）
101	19B3187927	韩瑜	MUTYH	c.53C>T	p.Pro18Leu	Missense	意义未明变异	00896466	1994.11	25	女	汉	山西太原	15935119385	G0P0	2020.08.31	深圳	IDC	0.3	0.2	3+	0.3	Luminal B Her-2阳性	ypT0.7cm	cT2N0M0，IIA；ypT1N0M0 IA	0/4	未知	NAC;TCbPH*6；2021.1.18 右BCT+SLNB；双靶*1年；OFS+AI*5年；放疗	无	无	无（2021.07.04）
74	19B0336627	杨就云	PMS1	c.419-17C>G		Splice	意义未明突变	00659285	1981.12	37	女	汉	广东阳山	13927442588	GXP2	2019.01.12	深圳	IDC	0.9	0.3	3+	0.5	Luminal B Her-2阳性型	ypT0.5cm	CT2N3M0，IIIC；ypT1N1M0，IIA	3/19+0/2	2	NAC;ddEC*4→THP*8；2019.8.29 左MRM；1年双靶；放疗；OFS+AI	无	无	无（2021.06.23）
76	19B3187758	李超	STK11	c.*16+16G>C	—	Splice	意义未明突变	00901509	1990.12	28	女	汉	江西赣州	13823306171	G2P1	2019.07.15	深圳	IDC	0.3	0.8	3+	0.3	Luminal B Her-2阳性	ypCR	cT2N1M0，IIB；ypTisN0M0，0期	0/20	未知	NAC;TCbHP*6；2019.12.15 左MRM；靶向PH*1年；戈舍瑞林+阿那曲唑	无	无	无（2021.05.14）
153	21B17241671	邓惠文	CDH1	c.43C>G	p.Leu15Val	Missense	意义未明变异	00552073	1979.03	42	女	汉	广东河源	13543296888	GXPX	2021.05.11	深圳	IDC	0.9	0.9	—	0.4	Luminal B Her-2阴	ypCR	cT1N1M0，IIA；ypCR	0/23	未知	2021.04.27 NAC ddEC*4→T*4；2021.08.20 右BCT+ALN	无	姨 54 岁诊断乳腺癌	无（2022.01.07）
152	21B17241673	王丽月	—	—	—	—	—	00978832	1978.04	42	女	汉	福建永州	13501589346	GXPX	2020.11.15	深圳	IDC	0.8	0.8	1+	0.15	Luminal B Her-2阴	yp4cm	cT3N1M0，IIIA；	6/10	1	2020.12.09 NAC:ddEC*4→T*4；2021.04.19 右BCT+ALN	无	无	无（2021.11.02）
151	21B17241667	邓艳芝	—	—	—	—	—	01022972	1989.02	32	女	汉	湖南永州	15999669500	GXPX	2021.07.35	深圳	IDC	0.8	0.8	—	0.4	Luminal B Her-2阴	yp2.5cm	cT2N0M0，IIA；ypT2N0M0，IIA	0/5	2	2021.08.26 NAC AC*4→T*4；2021.12.28 右全切+SLN	无	无	时间过短
154	21B17241672	朱秀云	NBN	c.37+6G>A	—	Splice	意义未明变异	01023769	1970.11	50	女	汉	广东梅州	13590410688	GXPX	2021.07.18	深圳	IDC	—	—	—	0.6	TNBC	yp1cm	cT2N0M0，IIA;ypT1N0M0,IA		3	2021.08.27 NAC ddEC*4→T*4；2021.12.22 右BCT+SLNB	无	无	时间过短
150	21B05019118	杨华	—	—	—	—	—	00993561	1976.07	45	女	汉	河南安阳	13798598090	GXPX	20201.04.06	深圳	ILC	0.9	0.9	1+	0.1	Luminal A	yp1.8cm	cT4NxM0 III期	5/5	2	2021.03.20 NAC:ddEC*4→T*4；2021.09.08 右BCT+右侧副乳腺癌根治+右ALN	2021.03 同期发现右副乳腺癌	无	无（2021.12.20）
5	17B0014739	曾华芳	—	—	—	—	—	00721924	1974.03	42	女	汉	广东阳西	13620926980	GXP2	2016.08.04	深圳	IDC	—	—	—	0.7	TNBC	yp1.0cm	cT2N0M0，IIA期；ypT1N0M0，IA期	0/3	3	2016.8.25 NAC:EC*4→P*12（qw）2017.1.18 右BCT+SLNB→CR 放疗 卡培他滨？	无	无	无（2019.05.21）
162	21B17241685	周利	—	—	—	—	—	00343933	1979.09	41	女	汉	湖南益阳	18675519375	GXP1	2021.04.10	深圳	IDC	0.9	0.1	—	0.15	Luminal B Her-2阴	yp1.0cm	cT1N1M0 IIa期；ypT1N0M0，I期	0/17	2	20211.05.14 NAC ddEC*4→T*4；2021.9.16 右BCT+ALN；内分泌+放疗	无	父亲 50 岁诊断胆管癌 母亲 50 岁诊断结直肠癌	无（2021.12.15）
78	19B3002259	陈剑英	—	—	—	—	—	00859307	1970.01	46	女	汉	湖北黄冈	13530828116	GXP1	2018.11.09	深圳	IDC	—	—	—	0.5	TNBC	yp0.7cm	cT2N0M0，IIA；ypT1N0M0，IA	0/3	3	NAC;EC*4→T*4；2019.4.16 左BCT+SLNB；放疗；卡培他滨	无	无	无（2021.07.02）
115	19B3187950	夏红梅	BARD1	c.233G>A	p.Cys78Tyr	Missense	意义未明变异	00779858	1978.07	39	女	汉	湖北钟祥	13538136889	G0P0	2017.07.21	深圳	IDC	0.8	0.6	3+	0.3	Luminal B Her-2阳性	yp0.2cm	cT2N1M0，IIB；ypT1N0M0 IA	0/9	2	NAC:ddEC*4→T*4；戈舍瑞林（q28d）；2017.12.20 右BCT+ALN；曲妥珠*1年；放疗*8次；内分泌治疗	无	无	无（2021.05.12）
190	19B0227907	张丽清	—	—	—	—	—	00887988	1959.09	59	女	汉	云南西双版纳	13728634639	GXPX	绝经	深圳	导管内乳头状癌	0.9	0.8	未知	未知	未知	Tis	pTisN0M0，0期	0/2	未知	2019.05.28 左MRM+SLNB	无	无	无（2020.05.19）
205	19B0101932	黄吟洲	—	—	—	—	—	00562832	1959.09	59	女	汉	广东深圳	13728634639	GXPX	绝经	深圳	导管内乳头状癌	0.9	0.8	未知	未知	未知	Tis	pTisN0M0，0期	0/2	未知	2019.05.28 左MRM+SLNB	无	无	无（2020.05.19）
51	19B3187770	卢云庄	RAD51D	c.757C>T	p.Arg253*	Nonsense	已知致病突变	00795829	1974.07	43	女	汉	江西修水	13534155219	GXPX	2017.10.23	深圳	IDC	0.5	0.2	—	0.6	Luminal B Her-2阴性型	7cm	pT3N2M0，IIIA	5/34	3	2017.11.24 右MRM；EC*4→T*4；放疗*25次；内分泌治疗	无	叔叔50岁食管癌	无（2021.08.01）
100	19B3187925	马伟旋	PDGFRA	c.2880+7T>C	—	Splice	意义未明突变	00956034	1984.03	36	女	汉	广东汕头	13823333982	GXP2	2020.06.20	深圳	DCIS	0.8	0.05	1+	0.2	Luminal B Her-2阴性	7cm	TisN0M0，0期	0/4	中级别	2020.8.4 右全切+SLNB；内分泌TAM*5	无	姑姑60岁乳腺癌	无（2021.06.23）
157	21B17241676	刘茜	PMS1	c.2755C>T	p.Arg919Cys	Missense	意义未明变异	00653230	1981.08	40	女	汉	广东深圳	18688774410	GXPX	2021.08.23	深圳	DCIS伴微浸润	—	—	3+	0.2	Her-2 阳性型	6cm	pT2N0M0，IIA	0/6	高级别	2021.09.08 右全切+SLNB；2021.10.09 TH*12	无	无	无（2021.12.09）
105	19B3187939	刘洪	BRIP1	c.1315C>T	p.Arg439*	Nonsense	已知致病变异	00810599	1977.07	40	女	汉	湖北鄂州	13923454765	GXP2	2018.02.20	深圳	IDC	—	—	3+	0.25	Her-2 阳性型	5cm	pT2N0M0，IIA	0/6	3	2018.2.27 右全切+SLNB；EC*4→TH*4；卡培他滨；姑息治疗（20200824）：爱立布林+PH	2019 甲状腺癌行左甲状腺癌根治（微小乳头癌）	父亲：非小细胞肺癌	2020.7 左上肺乳腺癌转移行手术；2021.4.21 左上肺再次转移
171	19B3187709	郑佳敏	BRCA2	c.4376A>G	p.Asn1459Ser	Missense	意义未明变异	00975343	1990.11	29	女	汉	广东揭阳	13424429854	GXP0	2020.10.11	深圳	IDC	0.05	0.05	3+	0.2	Luminal B Her-2阳	5cm	cT3N1M0 IIIA期；ypTisN0M0 0期	0/17	未知	2021.2.20 NAC:TCbHP*6 2021.06.28 右MRM；术后双靶	无	无	时间过短
55	19B3187761	袁琳曦	—	—	—	—	—	00839455	1981.08	37	女	汉	河北保定	13421389006	GXPX	2018.08.07	深圳	DCIS	—	—	3+	0.15	Her-2 阳性型	4cm	pTisN0M0，0期	0/3	高级别	2018.8.15 左全切+SLNB 术后未化疗	无	无	2020.1.14 左腋窝淋巴结肿大 术后2/13+0/2+0/1 TCbHP*6 放疗25次 靶向治疗*1年 无其他转移（2020.12.08）
89	20B2447023	屈瑞	ATM	c.6101G>A	p.Arg2034Gln	Missense	意义未明突变	00363290	1980.01	39	女	汉	湖北京山	18038192001	GXP2	2019.10.28	深圳	ILC	0.8	0.8	1+	0.15	Luminal B Her-2阴性	4cm	pT2N3M0，IIIC	21/28+3/4	2	2019.11.20 右MRM；EC*4→T*4；放疗；内分泌治疗	无	无	无（2021.07.12)
99	19B3187924	陈宝珠	PMS2	c.338C>G	p.Ser113*	Nonsense	疑似致病变异	00380367	1983.04	37	女	汉	广东深圳	13560752075	GXPX	2020.06.20	深圳	ILC	0.8	0.9	1+	0.2	Luminal B Her-2阴性	4cm	pT2N0M0，IIA	0/2	2	2020.7.8 右全切+SLNB；TC*4；依西美坦	无	无	无（2021.08.09）
192	19B3187931	朱让玫	BARD1	c.1479A>C	p.Gln493His	Missense	意义未明变异	00896899	1970.01	49	女	汉	河南开封	13922811572	GXPX	2019.07.22	深圳	IDC	0.7	0.1	3+	0.25	Luminal B Her-2阳性	4cm	cT2N0M0 IIA;ypT2N0M0 IIa期	0/5	2	2020.07.24 TCbPH*6；2020.11.25 行左全切+SLNB；术后T-DM1	无	无	无（2021.12.13）
198	19B3187963	黄惠容	—	—	—	—	—	00959478	1970.12	49	女	汉	广东河源	18098933328	GXP1	48岁绝经	深圳	ILC	—	—	3+	0.2	Her-2阳性型	4cm	cT2N3M0，IIIC；ypCR	0/5	3	2020.08.19 TCbPH*6；2020.12.29 左BCT+SLNB	无	无	无（2021.10.18）
203	18B4028409	张艳红	—	—	—	—	—	00582421	1982.02	37	女	汉	湖南岳阳	17023433678	GXP1	2020.10.14	深圳	IDC	0.7	0.1	3+	0.25	Luminal B Her-2阳性	4cm	cT2N0M0 IIA;ypT2N0M0 IIa期	0/5	2	2020.07.24 TCbPH*6；2020.11.25 行左全切+SLNB；术后T-DM1	无	无	无（2021.12.13）
24	17B0130930	苏悦	PALB2		c.3225T>	p.Ser1075Arg	意义未明突变	00783269	1996.07	21	女	汉	广东深圳	13428652820	GXP0	2017.07.28	深圳	IDC	0.6	0.3	—	0.15	LuminalB Her-2阴性型	3cm	pT2N0M0，IIA期	0/4	2	2017.09.06 右全切+SLNB；EC*4→P*4 （q2w）戈舍瑞林+他莫昔芬	无	姑姑白血病；外祖父肺癌	无（2020.03.08）
32	18B3203664	黄玉芳	BRCA1	c.5200T>C	p.Phe1734Leu	Missense	意义未明突变	00813004	1973.1	44	女	汉	江西九江	13816822008	GXP1	2018.03.05	深圳	IDC	0.7	0.7	—	0.35	Luminal B Her-2阴	3cm	pT2N0M0，IIA	0/28	3	2018.03.20 右BCT+ALN；EC*4→T*4；内分泌治疗	无	外婆乳腺癌	无（2021.03.24）
60	19B0103264	毛素莺	—	—	—	—	—	00341884	1975.08	42	女	汉	广东深圳	13554868866	G2P1	2018.03.08	深圳	IDC	—	—	—	0.3	TNBC	3cm	pT2N0M0，IIA	0/9	3	2018.3.23 左全切+SLNB；EC*4→T*4	无	母亲胆管癌（去世）；哥哥鼻咽癌；姐1：右肺癌+肾癌；姐2：肺癌	2020.9.25 穿刺发现胸壁转移；骨转移 cIV 期
82	19B3187753	黄燕	CHEK2	c.538C>T	p.Arg180Cys	Missense	意义未明突变	00435073	1975.07	44	女	汉	重庆长寿	13543331315	G2P1	2019.12.26	深圳	腺样囊性癌	—	—	—	0.2	TNBC	3cm	pT2N0M0；IIA	0/7	未知	2020.1.13 左全切+SLNB；EC*4→T*4	无	无	无（2021.02.26）
96	20B2446954	巫彩霞	BRCA2	c.6937+10G>C	—	Splice	意义未明突变	00950087	1987.07	32	女	汉	广东茂名	13824887076	GXPX	2020.06.21	深圳	IDC	0.8	0.3	1+	0.25	Luminal B Her-2阴性	3cm	pT2N0M0，IIA	0/4	2	2020.7.2 右全切+SLNB；TC*6；内分泌	无	无	无（2021.05.24）
111	19B3002275	戴国辉	CFTR	c.4357C>T	p.Arg1453Trp	Missense	意义未明变异	00966965	1977.04	43	女	汉	湖南邵阳	13530801909	GXP2	2020.08.28	深圳	右ILC	右90%	0.9	—	0.2	Luminal B Her-2阴性	3cm	pT2N1M0，IIB	3/17	2	2020.9.28 双乳切+双SLNB+右ALN；EC*4→T*4；内分泌依西美坦*10年；放疗	无	无	无（2021.06.16）
179	21B17241702	高雪	MLH1	c.2235C>G	p.Asn745Lys	Missense	意义未明变异	01018053	1982.11	38	女	汉	辽宁	18689499990	GXP2	2021.07.18	深圳	IDC	—	—	—	0.7	TNBC	3cm	cT2N1M0 IIB		未知	2021.07.27 NAC:TAC*6;2021.12.02 右BCT+SLNB	无	无	时间过短
196	19B3187729	刘红	—	—	—	—	—	00905905	1982.02	37	女	汉	湖北荆州	13590246636	GXP1	2019.07.29	深圳	IDC	0.9	0.9	1+	0.1	Luminal A	3cm	pT2N0M0，IIA	0/5	2	2019.09.04 右BCT+SLNB；TC*4	无	无	无（2021.12.24）
208	21B05019129	陈梓钧	RAD50	c.2686A>G	p.Thr896Ala	Missense	意义未明变 异	00785669	1998.07	23	女	汉	广东深圳	13434552820	GXP0	2021.07.28	深圳	IDC	0.6	0.3	—	0.15	LuminalB Her-2阴性型	3cm	TisN0M0，0期	0/4	2	2021.09.06 右全切+SLNB；	无	母亲 44 岁诊断乳腺癌	无（2020.03.08）
126	19B3187971	林洁波	ATM	c.283C>A	p.Gln95Lys	Missense	意义未明变异	00988223	1980.03	40	女	汉	广东揭阳	13510443514	GXPX	2021.01.21	深圳	IDC	—	—	3+	0.7	Her-2 阳性型	3.9cm	pT2N0M0，IIA	0/4	3	2021.2.22 左BCT+SLNB；TCbPH*6 q3w；双靶*1年	无	无	无（2021.07.07）
2	17B0014395	文如凤	CHEK2		c.1111C>T	p.His371Tyr	疑似致病突变	00671017	1962.05	53	女	汉	广东潮安	13530731446	GXP2	2015.09.12	深圳	IDC	—	0.05	—	0.2	Luminal B Her-2阴	3.5cm	pT2N0M0，IIA期	0/4	3	2015.9.9 左乳全切+SLNB ；FEC*4→T*4； 他莫昔芬*5年	无	无	2016.12.20纵膈及左腋窝多发增大淋巴结 肝内多发转移瘤
61	19B0103824	文丽芳	BARD1	c.73G>C	p.Ala25Pro	Missense	意义未明突变	00746207	1973,07	44	女	汉	广东深圳	13612875929	GXP2	2018.03.03	深圳	IDC	—	—	3+	0.25	Her-2阳性型	3.5cm	pT2N1M0，IIB	1/34	3	2018.3.27 左MRM；EC*4→PH*12；靶向治疗1年；放疗	2017.1.9 垂体7泌乳素瘤 溴隐亭治疗	无	无（2019.09.06）
84	20B6945158	石如杰	ATM	c.3153+20dupT	—	Splice	意义未明突变	00248273	1974.07	45	女	汉	吉林长春	13760106081	GXP1	2020.03.15	深圳	IDC	0.9	0.1	—	0.4	Luminal B Her-2阴性	3.5cm	pT2N2M0，IIIA	6/12	2	2020.3.31 右MRM；ddEC*4→T*4；放疗；内分泌治疗	无	无	无（2021.04.07）
26	17B0130932	马红杰	BRCA2		c.164A>G	p.Asn55Ser	意义未明突变	00659412	1980.03	37	女	汉	河南商丘	13802253123	GXP1	2017.02.28	深圳	IDC	0.8	0.95	—	0.05	Luminal A	3.0cm	pT2N0M0，IIA期	0/6	2	2017.3.30 右BCT+SLNB；TC*4；放疗*25次；内分泌治疗	无	无	无（2020.10.23）
19	17B0076236	李小英	—	—	—	—	—	00677175	1970.02	45	女	汉	广东河源	13600154966	GXPX	2015.10.08	深圳	IDC	0.8	0.9	—	0.4	LuminalB Her-2阴性型	2cm	pT1N1M0，IIA期	1/11	2	2015.11.6右MRM FEC*3→T*3 放疗*28次 内分泌治疗	无	奶奶肺癌	无（2021.04.22）
33	18B3203666	邹慧如	—	—	—	—	—	00812208	1989.07	28	女	汉	福建莆田	13528425122	G3P1	2018.02.21	深圳	IDC	0.2	0.1	3+	0.3	Luminal B Her-2阳	2cm	pT1cN1minM0，IB	微转移1/5	2	2018.3.13 左保乳+SLNB：EC*4→TH*4；放疗；靶向*1年；内分泌*5年	无	无	无（2021.06.17）
83	19B3187752	叶鑫妹	ATM	c.875C>T	p.Pro292Leu	Missense	已知致病突变	00929363	1993.04	26	女	汉	福建南平	15060010092	G0P0	2019.12.13	深圳	ILC	0.85	0.85	1+	0.15	Luminal B Her-2阴性	2cm	pT1N0M0，IA	0/4	2	2020.1.21 左全切+SLNB；TC*4；他莫昔芬+OFS*10年	无	无	无（2021.04.15）
118	19B3187956	林丽娥	RAD50	c.1052-6dupT	—	Splice	意义未明变异	00950831	1979.01	40	女	汉	广东深圳	13058080998	GXP1	2020.05.17	深圳	IDC	0.9	0.2	1+	0.6	Luminal B Her-2阴性	2cm	cT2N1M0，IIB；ypT1N0M0 IA	0/28	2	2020.7.3 EC*4→T*4；2020.11.9 右MRM；放疗；卡培他滨？OFS+AI	无	无	无（2021.05.31）
130	21B05019150	杨丹娇	PTCH2	c.1568C>T	p.Ala523Val	Missense	意义未明变异	00998211	1992.01	29	女	汉	广东深圳	13424371032	GXP0	2021.03.19	深圳	IDC	0.8	0.9	1+	0.15	Luminal B Her-2阴性	2cm	pT1N0M0，IA	0/2	1	2021.4.2 左全切+SLNB；TC*4；OFS+依西美坦*5年	无	姐姐甲状腺癌	无（2021.08.05）
181	21B17241704	夏艳梅	CDH1	c.1018A>G	p.Thr340Ala	Missense	意义未明变异	01042767	1978.04	43	女	汉	湖北荆门	13926536176	GXPX	2021.11.10	深圳	左ILC	0.8	0.9	1+	0.2	Luminal B Her-2阴	2cm	pT1N0M0，IA	0/5	3	2021.12.03 左BCT+SLNB；TC*4	无	无	时间过短
210	21B17241710	徐秀春	—	—	—	—	—	01046831	1979.11	42	女	汉	广东揭阳	13554996413	GXPX	2021.12	深圳	DCIS	—	—	0.2	0.2	TNBC	2cm	TisN0M0，0期	0/5	中至高级别	2021.12.27 左全切+SLNB；术后内分泌治疗	无	无	时间过短
180	19B3187781	曾桂花	—	—	—	—	—	01040989	1977.04	44	女	汉	广东潮州	15118161023	GXPX	2021.10.30	深圳	左DCIS	0.9	0.7	1+	0.1	Luminal A	2.8cm	TisN0M0，0期	0/3	中级别	2021.12.01 双乳切+SLNB；TC*4	无	无	时间过短
204	18B4154357	刘海霞	NBN	c.1336G>A	p.Ala446Th	Missense	意义未明突变	00819832	1983.01	36	女	汉	广东梅州	18162234014	G2P1	2021.03.04	深圳	DCIS	0.9	0.7	1+	0.1	Luminal A	2.8cm	TisN0M0，0期	0/3	中级别	2021.12.01 左乳全乳切+SLNB；TC*4	无	无	时间过短
186	19B3187790	邓彩霞	PALB2	c.2360C>T	p.Thr787Ile	Missense	意义未明变异	01047927	1980.02	41	女	汉	广东梅州	13510636386	GXPX	2021.12.23	深圳	IDC	0.9	0.9	2+	0.1	Luminal A	2.6cm	pT2N0M0，IIA	0/4	2	2021.12.29 右全切+SLNB；待化疗	无	无	时间过短
34	18B4027019	林桂花	BRCA2	c.7772A>G	p.Asn2591Ser	Missense	意义未明突变	00767807	1979.08	37	女	汉	广东韶关	18320899458	GXP2	2017.04.28	深圳	IDC	0.95	0.8	—	0.2	Luminal B Her-2阴	2.5cm	pT2N2M0，IIIA期	5/17 胸肌间2/2	2	2017.5.26 左MRM；EC*4→T*4；放疗；内分泌治疗	无	姑姑乳腺癌	无（2021.04.25）
45	18B4159507	安娜	BRCA2	c.8092G>A	p.Ala2698Thr	Missense	意义未明突变	00861240	1989.03	29	女	汉	四川广元	13923760375	GXP1	2018.11.29	深圳	IDC	0.7	0.6	1+	0.35	Luminal B Her-2阴	2.5cm	pT2N2M0，IIIA期	6/26	3	2018.12.14 右MRM；ddEC*4→T*12；放疗*27次；内分泌*5年	无	无	2019胸壁肿物怀疑转移（B超发现）未处理
63	19B0104331	王天娱	—	—	—	—	—	00707009	1974.12	41	女	汉	辽宁锦州	13602688188	GXP1	2016.04.08	深圳	浸润性微乳头癌	0.8	0.7	3+	0.2	Luminal B Her-2阳性型	2.5cm	pT2N1M0，IIB	2/17	3	2016.5.18 左全切+SLNB；EC*4→TH*4；内分泌；放疗	2019.4.15 右乳癌 行右全切+SLNB，IDC，pT1N0M0，IA，术后行EC*4→T*4；托瑞米芬+戈舍瑞林	无	无（2021.03.13）
75	19B3187760	黄小红	PMS2	c.1354G>C	p.Gly452Arg	Missense	意义未明突变	00337785	1961.04	58	女	汉	广东深圳	13602515087	GXPX	50岁绝经	深圳	左浸润性乳头癌	0.9	0.9	—	0.05	Luminal A	2.5cm	pT2N0M0；IIA	0/4	1	2019.12.26 左BCT+SLNB；TC*4；放疗；内分泌	2005右乳癌行MRM，T3N2M0；FEC*5(未完成）	无	无（2021.06.06）
80	19B3187912	王英	—	—	—	—	—	00915689	1971.09	48	女	汉	湖北益阳	13510218780	G2P2	2019.10.05	深圳	IDC	—	—	—	0.7	TNBC	2.5cm	pT2N0M0；IIA	0/4	3	2019.10.30 左BCT+SLNB；ddEC*4→P*4；	无	父亲肺癌	无（2020.05.12）
94	20B2446958	王婧	—	—	—	—	—	00945770	1986.08	33	女	汉	黑龙江大兴安岭	13480622855	GXP1	2020.05.31	深圳	IDC	0.8	0.9	—	0.2	Luminal B Her-2阴性	2.5cm	pT2N0M0，IIA	0/5	2	2020.6.18 左BCT+SLNB；TC*6；放疗；内分泌治疗	无	无	无（2021.05.21）
95	20B2446957	廖洁婷	—	—	—	—	—	00943747	1980.04	40	女	汉	广东深圳	13699822223	GXP2	2020.05.12	深圳	IDC	0.9	0.9	1+	0.2	Luminal B Her-2阴性	2.5cm	pT2N0M0，IIA	0/3	2	2020.5.26 左全切+SLNB；TC*4；OFS+AI*10年	无	无	无（2021.06.04）
114	19B3187949	张洋	—	—	—	—	—	00970124	1980.02	40	女	汉	哈尔滨	13923881982	G0P0	2020.10.18	深圳	IDC	0.9	0.9	1+	0.1	Luminal A	2.5cm	pT2N1M0，IIB	1/19	2	2020.11.2 右全切+SLNB+ALN；EC*4→T*4；内分泌治疗；放疗	2008 甲状腺癌 2013行颈清	无	无（2021.02.16）
137	21B05019136	万萍	SMARCA4	c.3082-18C>T	—	Splice	意义未明变 异	00895949	1979.12	39	女	汉	江西抚昌	13631653584	GXP2	2019.06.13	深圳	IDC	—	—	3+	0.2	Her-2 阳性型	2.5cm	cT2N1M0，IIB；ypT2N2M0 IIIA	4/17	3	2019.7.17 NAC EC*4→THP*4 q3w;2020.1.13 右MRM；放疗*25次，T-DM 1*1年	无	叔叔肝癌	无（2021.06.20）
169	19B3187702	罗爱花	—	—	—	—	—	01011040	1981.1	39	女	汉	广东汕尾	15089503552	GXPX	2021.05.14	深圳	IDC	0.9	0.9	1+	0.05	Luminal A	2.5cm	cT2N1M0 IIB	3/17	1	2021.06.22 ddAC*4→T*4；2021.10.14 左MRM	无	无	时间过短
177	19B3187772	敬丽萍	—	—	—	—	—	01040979	1987.04	34	女	汉	福建莆田	18042503333	GXPX	2021.1	深圳	IDC	0.9	0.9	1+	0.3	Luminal B Her-2阴性	2.5cm	pT2N1M0，IIB	1/8	2	2021.12.01 左BCT+SLNB；TC*4	无	无	时间过短
193	20B2446960	秦秋琼	—	—	—	—	—	00933277	1971.02	49	女	汉	广西桂林	13510776246	GXP1	2020.02.10	深圳	IDC	0.9	0.2	-	0.4	Luminal B Her-2阴	2.5cm	cT2N1M0 IIB	3/17	2	2020.02.26 NAC:ddEC*4→T*4；2020.08.20 左MRM；	无	无	无（2021.12.07）
195	18B3965520	陈柳	—	—	—	—	—	00737889	1964.08	52	女	汉	广东海丰	13530689632	GXP1	2016.05.13	深圳	IDC	40%%	0.2	1+	0.1	Luminal A	2.5cm	pT2N2M0 IIIA	5/12	2	2016.11.21 左MRM；ddEC*4→T*4；	无	无	2021.3年左胸壁复发
47	19B3002255	唐华	SMARCA4	c.5007+5G>A	—	splice	意义未明突变	00799689	1977.09	40	女	汉	湖北襄樊	13823276655	GXP2	2017.12.15	深圳	IDC	0.9	0.6	—	0.1	Luminal A	2.4cm	pT2N1M0，IIB	3/17	2	2018.1.15 右全切+SLNB+ALN；EC*4→T*4；放疗；内分泌治疗	无	父亲胃癌	无（2021.06.08）
112	19B3187948	李美玲	—	—	—	—	—	00969259	1988.03	32	女	汉	陕西商洛	18092239225	G0P0	2020.09.17	深圳	IDC	0.85	0.8	3+	0.4	Luminal B Her-2阳性	2.2cm	pT2N0M0，IIA	0/4	3	2020.10.20 右全切+SLNB；TCbH*6；曲妥珠*1年；内分泌治疗	无	爷爷80岁食管癌	无（2021.06.11）
129	21B05019151	彭婷	PALB2	c.2608G>T	p.Val870Leu	Missense	意义未明变异	00998453	1984.01	37	女	汉	湖北武汉	15013689632	GXPX	2021.03.05	深圳	IDC	—	—	—	0.7	TNBC	2.2cm	pT2N0M0，IIA	0/5	3	2021.4.8 左BCT+SLNB；ddEC*4→P*4 q14d；放疗；卡培他滨？	无	奶奶60岁结直肠癌	无（2021.08.16）
132	21B05019145	刘蓉	MSH6	c.3173-10C>A	—	Splice	意义未明变异	00983963	1977.03	43	女	汉	湖南长沙	13923458564	G3P1	2020.12.20	深圳	IDC	0.9	0.9	—	0.2	Luminal B Her-2阳性	2.2cm	pT2N1M0，IIB	1/8	2	2021.1.7 左BCT+SLNB；TC*6；放疗；OFS+AI	无	无	无（2021.04.06）
159	21B17241680	黄燕红	—	—	—	—	—	01013901	1983.09	37	女	汉	广东河源	13510776386	GXP0	2021.05.28	深圳	IDC	—	—	—	0.3	TNBC	2.2cm	ypT2N1M0 IIb期	3/12	2	20201.07.05 NAC ddEC*4→T*4；2021.10.28 右MRM；放疗	无	无	时间过短
166	19B3002303	姚雯	—	—	—	—	—	01030207	1982.12	38	女	汉	江西九江	13691946876	GXP0	2021.09.10	深圳	IDC	0.9	0.9	1+	0.4	Luminal B Her-2阴	2.2cm	pT2N0M0，IIA期	0/5	3	2021.09.29 左BCT+SLNB；TC*4	无	母亲诊断宫颈癌 爷爷诊断非小细胞肺癌	时间过短
25	17B0130931	黄玉连	BARD1		c.2191C>T	p.Arg731Cys	意义未明突变	00727926	1986.12	29	女	汉	广东惠东	13420918252	GXP2	2016.08.20	深圳	IDC	0.8	0.7	—	0.05	Luminal A	2.1cm	pT2N1M0，IIB期	1/18	3	2016.9.23 右BCT+ALN；后续治疗不详	无	无	无（2021.04.13）
1	17B0014394	谭慕芬	MUTYH		c.74G>A	p.Gly25Asp	意义未明突变	00746390	1958.04	59	女	汉	广东佛山	18686426493	GXP1	绝经	深圳	IDC	0.9	0.85	1+	0.1	Luminal A	2.0cm	pT1N0M0，IA期	0/4	2	2017.1.10 左乳全切+SLNB TC*4 内分泌治疗	无	母亲 乳腺癌 表妹 乳腺癌	（失联）
30	18B3190557	刘梦葳	ATM	c.9036_9038delACT	p.Leu3013del	Deletion	意义未明突变	00780373	1981.05	36	女	汉	宁夏银川	13590479782	GXP0	2017.07.24	深圳	IDC	0.85	0.85	—	0.3	Luminal B Her-2阴	2.0cm	pT1N1M0，IIA	1/13	3	2017.8.10 右全切+ALN；EC*4→T*4；内分泌治疗；放疗	无	外公胆囊癌（去世）	无（2020.07.18）
64	19B0106013	吴洁雅	—	—	—	—	—	00864843	1989.09	29	女	汉	福建厦门	18576726905	GXP0	2018.12.25	深圳	IDC	0.9	0.9	0	0.4	Luminal B Her-2阴性型	2.0cm	pT1N2M0，IIIA	7/24	2	2019.1.4 右全切+SLNB；EC*4→T*12；放疗；依西美坦+戈舍瑞林	无	无	无（2021.06.04）
102	19B3187930	尹秀珍	—	—	—	—	—	00958309	1958.04	62	女	汉	吉林长春	13699865999	GXP1	48岁绝经	深圳	IDC	—	—	1+	0.6	Luminal B Her-2阴性	2.0cm	pT1N0M0，IA	0/8	3	2020.8.17 右全切+SLNB；TC*6；卡培他滨维持化疗	无	妹妹42岁乳腺癌（去世）；父亲91岁膀胱癌（去世）；哥哥非小细胞肺癌（去世）	无（2021.07.11）
156	21B17241677	邹碧群	MRE11A	c.846-9C>T	—	Splice	意义未明变异	00518099	1981.04	36	女	汉	广东深圳	13543286730	GXP2	2018.02.23	深圳	右IDC	0.9	0.9	3+	0.5	Luminal B Her-2阳	2.0cm	pT1N0M0，IA期	0/19	1	2013 行右MRM，术后行FEC-TH、靶向、他莫昔芬+戈舍瑞林2年半	双乳癌	父亲肺癌	2018 右胸壁复发；2021胸骨转移、左胸锁乳突肌转移癌
35	18B4065818	李京苑	ATM	c.6006+8T>C	—	Splice	意义未明突变	00559786	1986.07	32	女	汉	广东深圳	13424268684	GXPX	2018.04.24	深圳	IDC	0.7	0.5	—	0.2	Luminal B Her-2阴	1cm	cT2N2M0，IIIA；ypT1N1M0，IIA	1/11+2/8	2	NAC:EC*4→T*4；2019.1.4 左BCT+ALN；放疗；内分泌；卡培他滨？	无	无	无（2020.12.08）
86	19B3187919	谭庆伟	—	—	—	—	—	00384988	1976.01	44	女	汉	吉林	13691618598	GXP1	2020.03.12	深圳	IDC	0.9	0.9	1+	0.25	Luminal B Her-2阴性	1cm	pT1N0M0，IA	0/3	2	2020.3.30 左BCT+SLNB；TC*4；放疗；内分泌治疗	无	无	无（2021.05.10）
107	19B3187982	周妙琴	CHEK2	c.538C>T	p.Arg180Cys	Missense	意义未明变异	00962043	1984.11	35	女	汉	广东惠州	13714592195	G0P0	2020.08.18	深圳	IDC	0.85	0.85	—	0.05	Luminal A	1cm	pT1N0M0，IA	0/3	1	2020.9.2 左BCT+SLNB；TC*4；放疗；依西美坦	无	无
128	21B05019152	文少华	BARD1	c.1338C>A	p.Tyr446*	Nonsense	已知致病变异	00499269	1971.07	44	女	汉	广东深圳	13149987041	G3P2	2016.01.21	深圳	IDC	0.4	0.6	3+	0.4	Luminal B Her-2阳性	1cm	pT1N1M0，IIA	2/18	2	2015.2.4 左全切+SLNB+ALN；AC*4→TH*4；曲妥珠*1年；放疗；托瑞米芬→依西美坦+OFS	无	无	无（2021.03.03）
138	19B3002296	罗敏霞	—	—	—	—	—	01012065	1980.01	41	女	汉	湖南常德	18974206537	GXP2	2021.05.20	深圳	IDC	0.01	0.01	3+	0.1	Luminal B Her-2阳性	1cm	pT1N0M0，IA	0/6	1	2021.6.21 左BCT+SLNB；TCbH*6 q21d	无	母亲57岁卵巢癌；姨妈47岁宫颈癌
199	21B05019143	孙蓓蓓	APC	c.868A>G	p.Ser290Gly	Missense	意义未明变异	01002547	1979.08	41	女	汉	广东珠海	13644543032	GXPX	子宫切除术后绝经	深圳	IDC	0.9	0.8	1+	0.02	Luminal A	1cm	pT1N0M0,IA	0/5	3	2021.04.27 右BCT+SLNB；TC*4	无	父亲胃癌	无（2021.12.17）
206	20B2446961	祝燕蓉	MUTYH	c.55C>T	p.Arg19*	Nonsense	已知致病变异	00496269	1971.07	44	女	汉	广东深圳	13149567041	G3P2	2019.01.21	深圳	IDC	0.4	0.6	3+	0.4	Luminal B Her-2阳性	1cm	pT1N1M0，IIA	2/18	2	2015.2.4 左全切+SLNB+ALN；AC*4→TH*4；曲妥珠*1年；放疗；托瑞米芬→依西美坦+OFS	无	无	无（2021.03.03）
87	19B3187918	李雯	BARD1	c.233G>A	p.Cys78Tyr	Missense	意义未明突变	00598666	1969.09	49	女	汉	云南昆明	13802270006	GXP0	2013子宫切除	深圳	IDC	0.95	0.7	1+	0.1	Luminal A	1.8cm	pT1N0M0，IA	0/6	3	2019.3.7 左BCT+SLNB；TC*4；放疗；内分泌治疗	无	母亲子宫内膜癌；父亲肠癌	无（2021.03.10)
124	19B3002279	夏莉蓉	RAD51D	c.550G>A	p.Glu184Lys	Missense	意义未明变异	00423750	1969.02	51	女	汉	广东深圳	13802558031	GXP1	50岁绝经	深圳	IDC	0.9	0.3	—	0.4	Luminal B Her-2阴性	1.8cm	pT1N0M0，IA	0/4	2	2021.2.8 右全切+SLNB；TC*4；AI*10年	无	母亲72岁乳腺癌；姐姐37岁双侧乳腺癌	无（2021.04.25）
172	21B17241693	陈海燕	BARD1	c.2224T>G	p.Leu742Val	Missense	意义未明变异	01037791	1981.04	40	女	汉	广东惠州	15077728282	GXP2	2021.10.23	深圳	IDC	0.9	0.9	—	0.05	Luminal A	1.8cm	pT1N0M0，IA	0/4	2	2021.11.15 左BCT+SLNB；TC*4	无	无	时间过短
185	21B17241707	陈建云	RAD50	c.298A>G	p.Met100Val	Missense	意义未明变异	00916073	1975.08	44	女	汉	湖南郴州	13570801445	GXPX	2019.10.11	深圳	右IDC	0.8	0.2	-	0.4	Luminal B Her-2阴	1.8cm	pT1N0M0，IA	0/5	2	2019.11.05 右BCT+SLNB；TC*4
187	21B17241707	陈建云	RAD50	c.298A>G	p.Met100Val	Missense	意义未明变异	00916073	1975.08	44	女	汉	湖南郴州	13923791447	GXPX	2019.10.11	深圳	IDC	0.8	0.2	—	0.4	Luminal B Her-2阴	1.8cm	pT1N0M0，IA	0/5	2	2019.11.05 右BCT+SLNB；TC*4	无	无	时间过短
6	17B0014740	王平	MRE11A		c.1842+4A>C		意义未明突变	00720813	1975.05	41	女	汉	湖北汉川	18127091246	GXP2	2016.07.13	深圳	IDC	1% 1+	—	1+	0.25	LuminalB Her-2阴性型	1.7cm	pT1N0M0，IA期	0/4	3	2016.8.11 左BCT+SLNB+左全切 2016.9.1 ddEC*4→P*12	无	无	（失联）
46	19B3187775	刘文娜	MRE11A	c.1724G>A	p.Gly575Asp	Missense	意义未明突变	00873179	1976.12	42	女	汉	广东梅州	13530083539	GXP1	2019.02.08	深圳	左DCIS	0.9	90%%	—	0.05	Luminal A	1.7cm	pTisN0M0，IA	0/4	低级别	2019.3.1、2019.3.12 行左/右全切+SLNB+扩张器	无	无	无（2021.07.28）
155	21B17241678	赖彩霞	—	—	—	—	—	01027523	1986.09	34	女	汉	广东惠州	13723402351	GXP0	2021.09.02	深圳	DCIS	0.8	0.8	1+	0.3	Luminal B Her-2阴	1.7cm	pTisN0M0，0期	0/5	中级别	2021.10.09 左全切+SLNB	无	姑姑乳腺癌	时间过短
42	18B4154358	黄文静	BRCA2	c.3521G>C	p.Gly1174Ala	Missense	意义未明突变	00855276	1981.03	37	女	汉	河南郑州	15815550316	GXP1	2018.10.22	深圳	IDC	0.9	0.9	—	0.1	Luminal A	1.6cm	pT1N0M0，IA	0/4	2	2018.11.14 左全切+SLNB；TC*4；内分泌治疗	无	无	无（2021.06.23）
10	17B0014744	洪巧婷	—	—	—	—	—	00694839	1981.06	34	女	汉	广东乐昌	13923881994	GXP2	2016.01.23	深圳	IDC	0.9	0.9	—	0.15	LuminalB Her-2阴性型	1.5cm	pT1N0M0，IA期	0/3	2	2016.3.8左全切+SLNB ddEC*4	无	无	2021.4 左胸壁复发 行左胸壁肿物切除术
18	17B0052999	李彩玉	—	—	—	—	—	00488938	1968.08	46	女	汉	广东深圳	13543300325	GXP0	2017.03,30	深圳	IDC	—	—	—	0.1	TNBC	1.5cm	pT1N0M0，IA期	0/4	3	2017.5.18 右BCT+SLNB；TC*4；放疗*25次	2015年左乳癌 DCIS	父亲肺癌（去世）	（失联）
36	18B4065819	史珊珊	—	—	—	—	—	00261758	1979.04	39	女	汉	安徽合肥	13609616817	GXP1	2018.08,24	深圳	DCIS	0.8	0.8	—	0.05	Luminal A	1.5cm	TisN0M0，0期	无	低级别	2018.9.4 右BCT；放疗*15次；内分泌*5年	无	母亲乳腺癌	无（2019.07.17）
43	18B4154360	方丽欢	MUTYH	c.715G>A	p.Val239Ile	Missense	意义未明突变	00854863	1984.11	34	女	汉	广东揭阳	18948213942	GXPX	2018.10.13	深圳	IDC	0.9	0.9	—	0.15	Luminal B Her-2阴	1.5cm	pT1N0M0，IA	0/4	2	2018.11.14左BCT+SLNB；TC*4；内分泌	无	无	无（2021.04.14）
48	19B3187771	宋丽莉	—	—	—	—	—	00525455	1979.09	40	女	汉	陕西咸阳	13923869122	GXP1	2019.10.31	深圳	DCIS	0.8	0.8	—	0.1	Luminal A	1.5cm	pTisN0M0，0期	0/4	低级别	2019.11.7 左BCT+SLNB；放疗	无	无	未知
54	19B3002258	胡敏	CHEK2	c.538C>T	p.Arg180Cys	Missense	意义未明突变	00917893	1985.11	34	女	汉	湖南常德	18682128918	GXP2	2019.10.10	深圳	IDC	0.9	0.4	1+	0.3	Luminal B Her-2阳性型	1.5cm	pT1N0M0，IA	0/3	2	2019.11.12 左BCT+SLNB；AC*4；内分泌治疗	无	无	无（2021.06.21）
68	19B0227821	李少红	ATM	c.6785C>G	p.Ala2262Gly	Missense	意义未明突变	00164788	1971.12	47	女	汉	广东深圳	13802704248	GXP2	2018.05.22	深圳	IDC	—	0.01	—	0.4	Luminal B Her-2阴性型	1.5cm	pT1N0M0，IA	0/4	2	2019.4.15 右保乳+SLNB；TC*6；放疗	无	无	2020.10.06 CT提示脑转移瘤 未进一步治疗
103	19B3187933	王称香	BRCA2	c.6121T>A	p.Ser2041Thr	Missense	意义未明变异	00956044	1992.06	28	女	汉	江西抚州	13421826907	GXPX	2020.06.28	深圳	IDC	0.9	0.85	1+	0.15	Luminal B Her-2阴性	1.5cm	pT1N0M0，IA	0/4	2	2020.7.30 右全切+SLNB；后续未知	无	姐姐20岁乳腺癌	未知
108	19B3187984	廖锋枢	—	—	—	—	—	00668860	1983.07	37	男	汉	广东五华	13600172739	男 已育	—	深圳	IDC	0.6	0.01	—	0.4	Luminal B Her-2阴性	1.5cm	pT1N0M0，IA	0/4	2	2020.9.17 左全切+SLNB；TC*6；内分泌治疗	无	无	无（2021.05.02)
109	19B3187943	陈海施	MSH2	c.2785C>T	p.Arg929*	Nonsense	意义未明变异	00964172	1977.01	42	女	汉	广东深圳	13670245537	G3P1	2020.08.16	深圳	左IDC	左90%	左90%	—	0.4	Luminal B Her-2阴性	1.5cm	pT1N1M0，IIA	左1/24	2	2020.9.14 双全切+右SLNB+左ALN	无	无	无（2020.12.22）
117	19B3187955	黄春凤	ATM	c.2776A>T	p.Lys926*	Nonsense	疑似致病变异	00975446	1964.05	56	女	汉	广东河源	13530385813	GXP1	53岁绝经	深圳	IDC	0.9	0.6	3+	0.4	Luminal B Her-2阳性	1.5cm	pT1N0M0，IA	0/3	2	2020.11.19 右BCT+SLNB；曲妥珠*1年；放疗；AI*10年	无	母亲、大姨乳腺癌	2021.7.13右乳复发？（B超示疤痕处4a类肿物）
125	19B3187973	周燕娇	—	—	—	—	—	00991518	1983.06	37	女	汉	广东深圳	13714444056	GXPX	2021.02,13	深圳	IDC	—	—	—	0.7	TNBC	1.5cm	pT1N0M0，IA	0/4	3	2021.2.23 右BCT+SLNB；EC*4→T*4；放疗；卡培他滨*1年	无	无	无（2021.07.23）
131	21B05019149	邵红群	—	—	—	—	—	00980985	1973.11	47	女	汉	广东云浮	13923755999	GXP2	2020.11.30	深圳	IDC	0.9	0.6	—	0.3	Luminal B Her-2阴性	1.5cm	pT1N0M0，IA	0/3	2	2020.12.24 左BCT+SLNB；TC*4；放疗；内分泌	无	无	无（2021.03.26）
139	21B05019135	龚新	ATM	c.3402+14A>C	—	Splice	意义未明变 异	01014667	1968.03	53	女	汉	四川成都	18926085605	GXPX	52岁绝经	深圳	IDC	0.2	—	3+	0.3	Luminal B Her-2阳性	1.5cm	pT1N0M0，IA	0/4	2	2021.7.5 右BCT+SLNB；TCbH*6	无	姐姐46岁乳腺癌；舅舅胃癌；妈妈65岁胰腺癌
141	21B05019133	刘翠	CHEK2	c.538C>T	p.Arg180Cys	Missense	意义未明变 异	01014485	1983.04	38	女	汉	广东河源	13632641830	GXP0	2021.07.07	深圳	IDC	0.95	0.95	—	0.25	Luminal B Her-2阴性	1.5cm	pT1N0M0，IA	0/4	2	2021.7.6 右全切+SLNB；TC*4	无	无
189	21B05019139	黄衬芳	ATM	c.6101G>A	p.Arg2034Gln	Missense	意义未明变 异	00740939	1970.11	49	女	汉	广东深圳	15013821872	GXP2	2020.05.10	深圳	IDC	0.9	0.9	1+	0.1	Luminal A	1.5cm	pT1N0M0,IA	0/5	2	2020.05.28 右BCT+SLNB；后续治疗未知	无	无	无（2022.01.06）
191	19B0336846	郑焕贤	—	—	—	—	—	00843268	1964.11	53	女	汉	内蒙古安盟	13316890567	GXP1	2018.05.14	深圳	IDC	0.8	0.03	-	0.05	Luminal B Her-2阴	1.5cm	pT1N1M0，IIA	2/19	2	2018.09.06 左BCT+SLNB	无	大舅贲门癌；五舅直肠癌；外公食管癌	无（2021.07.06）
194	17B0015380	徐红先	—	—	—	—	—	00196115	1968.02	36	女	汉	湖北武汉	13923793236	GXPX	未绝经	深圳	IDC	0.7	0.6	-	0.25	Luminal B Her-2阴	1.5cm	cT1N1M0 IIa期；	11/23	3	2001.10.22 左MRM；TAC*6	无	无	17年后发现复发转移
197	19B3187962	黄莉	MSH2	c.2386A>G	p.Thr796Ala	Missense	意义未明变异	01001666	1976.11	44	女	汉	广东湛江	13670271421	G1P1	2021.04.01	深圳	IDC	-	-	1+	0.5	TNBC	1.5cm	pT1N1M0	0/3	3	2021.04.06 右BCT+SLNB；ddEC*4→T*4；	无	无	无（2021.12.13）
148	21B05019121	吴美颜	—	—	—	—	—	00763003	1982.01	38	女	汉	广东增城	13519485735	GXP2	2021.07.19	深圳	IDC	0.8	0.95	—	0.4	Luminal B Her-2阴	1.3cm	pT1N0M0，IA	0/4	2	2021.08.11 右BCT+SLNB；TC*6	无	无	无（2021.11.08）
163	21B17241686	冯英艳	NF1	c.4772+11C>T	—	Splice	意义未明变异	00867408	1979.06	39	女	汉	湖南永州	13798421306	GXP2	2019.01.05	深圳	IDC	—	—	3+	0.2	Her-2 阳性型	1.3cm	pT1N0M0，IA	0/12	2	2019.01.21 右BCT+SLNB	无	无	2021右乳癌复发
170	19B3187703	叶清雯	BRCA1	c.2882A>G	p.Asn961Ser	Missense	意义未明变异	01033983	1988.01	33	女	汉	广东汕尾	13509692646	G4P3	2021.01.05	深圳	IDC	0.9	0.9	1+	0.2	LuminalB Her-2阴性型	1.3cm	pT1N0M0，IA	0/4	2	2021.10.19 右BCT+SLNB；TC*4	无	母亲 60 岁诊断乳腺癌	时间过短
188	外院报告	黄超群	—	—	—	—	—	00629163	1987.07	33	女	汉	广东惠州	18938655430	GXP2	2021.01.23	深圳	IDC	—	—	3+	0.5	Her-2 阳性型	1.3cm	cT2N1M0 IIB；ypCR	0/5	2	2021.02.22 NAC：TCbPH*6;2021.06.23 右BCT+SLNB	无	舅舅肝癌；表哥肝癌；奶奶81岁乳腺癌	时间过短
4	17B0014738	陈晓容	ATM		c.5624G>A	p.Arg1875Gln	意义未明突变	00707936	1980.01	34	女	汉	广东汕头	13824398066	GXP2	2016.05.01	深圳	DCIS	0.95	0.95	3+	0.3	LuminalB Her-2阳性型	1.2cm	pT1N0M0，IA期	0/5	3	2016.5.18 右乳全切+SLNB ddEC*4→PH*12 赫赛丁*1年 阿那曲唑→他莫昔芬	无	无	无（2021.01.22）
23	17B0130929	李丽云	PMS1		c.1352C>T	p.Thr451Met	意义未明突变	00760294	1979.08	37	女	汉	广东深圳	13590113729	GXP1	2017.03.21	深圳	IDC	0.6	0.8	—	0.1	Luminal A	1.2cm	pT1N0M0，IA期	0/5	3	2017.4.13 左BCT+SLNB；TC*4；内分泌治疗	无	无	无（2021.02.24）
37	18B4065820	邹宗惠	BRCA1	EX18_19 DUP	—	Duplication	意义未明突变	00445620	1984.09	33	女	汉	江西九江	15818601848	GXP2	2018.08.25	深圳	左IDC	—	0.01	—	0.8	TNBC	1.2cm	pT1N0M0，IA	0/7	3	2018.7.27行左全切+SLNB；AC*4→PTX*12	2009 右乳癌 行右MRM（IDC）FEC*6	母亲、姨妈乳腺癌病逝；表姐乳腺癌	无（2020.04.17）
73	19B0336626	郭燕	—	—	—	—	—	00744988	1967.11	49	女	汉	重庆	13620219132	GXP1	2016.12.25	深圳	IDC	—	—	—	0.3	TNBC	1.2cm	pT1N0M0，IA	0/1	2	2017.1.11 右BCT+SLNB；EC*4→T*4；放疗*27次	2020.1 胃间质瘤手术	无	无（2021.03.21）
88	20B6945126	谢玉珍	PALB2	c.1255T>C	p.Cys419Arg	Missense	意义未明突变	00742801	1968.11	48	女	汉	广东深圳	13823299382	GXP1	2016.12.10	深圳	右IDC	0.85	0.8	3+	0.35	Luminal B Her-2阳性	1.2cm	pT1N0M0，IA	0/5	3	2020.04.16 行右全切+SLNB；qwPH12周方案	双乳癌	无	无（2021.09.29）
113	20S8740203	吕秀丽	CDH1	c.2515G>A	p.Gly839Ser	Missense	意义未明变异	00681901	1984.05	36	女	汉	山东聊城	13751071920	G5P2	2020.09.27	深圳	IDC	0.8	0.8	1+	0.1	Luminal A	1.2cm	pT1N0M0，IA	0/2	1	2020.10.19 右全切+SLNB；TC*4；内分泌	无	无	无（2021.07.26）
135	19B3002294	胡广菲	—	—	—	—	—	01009958	1993.11	27	女	汉	内蒙古安盟	13923731613	GXPX	2021.02.01	深圳	IDC	0.9	0.8	3+	0.6	Luminal B Her-2阳性	1.2cm	cT2NxM0；ypT1N0M0 IA	0/4	2	外院NAC:TCbPH*6 2021.6.7 左BCT+SLNB；靶向*1年；内分泌；放疗	无	姨妈45岁乳腺癌	无（2021.7.14）
145	21B05019127	蒋莉	ALK	c.2210C>T	p.Ser737Leu	Missense	意义未明变 异	01017286	1971.1	49	女	汉	四川眉山	13823388919	GXP0	2021.06.05	深圳	右IDC	0.8	0.4	—	0.15	Luminal B Her-2阴性	1.2cm	pT1N0M0，IA	3/20	2	2021.7.27 右MRM+左全切+左SLNB；EC*4→T*4；内分泌治疗	双乳癌	父亲直肠癌	无
200	18B3190558	吴扬慧	CDH1	c.1296C>G	p.Asn432Lys	Missense	意义未明突变	00405334	1982.03	37	女	汉	广东揭阳	13677435674	GXPX	2020.04.13	深圳	IDC	0.9	0.7	1+	0.1	Luminal A	1.2cm	pT1N0M0，IA	0/5	2	2020.12.24 左BCT+SLNB；TC*4；放疗；内分泌	无	无	无（2021.12.03）
202	18B4015547	李青燕	—	—	—	—	—	00782341	1963.03	58	女	汉	广东珠海	13868783358	GXPX	已绝经	深圳	IDC	—	—	—	0.4	TNBC	1.2cm	pT1N0M0,IA	0/3	3	2020.08.02 左全切+SLNB；ddEC*4→T*4	无	无	无（2022.01.16）
69	19B0280703	陈秀芳	BRCA2	c.9690A>T	p.Leu3230Phe	Missense	意义未明突变	00816213	1971.12	46	女	汉	四川三台	18938900050	GXPX	40岁绝经	深圳	IDC	—	—	—	0.9	TNBC	1.1cm	pT1N1M0，IIA	1/20	3	外院 2017.8.2 右保乳+ALN；EC*4→T*4；放疗25次	无	无	无（2019.01.22）
11	17B0014745	李翡凤	ATM		c.6101G>A	p.Arg2034Gln	意义未明突变	00302429	1981.01	35	女	汉	广东深圳	13510222434	GXP2	2016.06.28	深圳	ILC	0.9	0.9	—	0.1	Luminal A	1.0cm	pT1N1M0，IIA期	1/13	1	2016.8.4 全切+ALN TC*4 放疗*27次 依西美坦*5年	无	无	无（已联系病人）
13	17B0016491	洪悦龄	MUTYH		c.934-2A>G	—	意义未明突变	00754353	1979.02	38	女	汉	广东深圳	13590382530	GXP0	2017.02.09	深圳	IDC	0.8	0.7	1+	0.1	Luminal A	1.0cm	pT1N0M0，IA期	0/8	2	2017.3.20 BCT+SLNB；TC*4；放疗*32 他莫昔芬*5年	无	无	无（已联系病人）
14	17B0031751	石伟婵	STK11		c.920+6C>T	—	意义未明突变	00753896	1974.11	42	女	汉	广东深圳	13502813776	GXP1	2017.02.28	深圳	IDC	0.9	0.9	—	0.05	Luminal A	1.0cm	pT1N1M0，IIA期	1/3	2	2017.3.16 右BCT+SLNB；TC*4 放疗*25 内分泌*5年	无	无	无（2020.08.09）
21	17B0130927	张丽芬	—	—	—	—	—	00759330	1985.09	31	女	汉	广东龙川	13927457851	GXP0	2017.03.22	深圳	IDC	0.8	0.8	—	0.1	Luminal A	1.0cm	pT1N0M0，IA期	0/4	1	2017.4.5 右全切+SLNB；TC*4；他莫昔芬*5年	无	外公肝癌	无（2020.03.09）
22	17B0130928	叶晓琼	—	—	—	—	—	00391083	1980.04	36	女	汉	广东河源	13682426868	GXP1	2017.04.09	深圳	IDC	0.99	0.99	1+	0.15	LuminalB Her-2阴性型	1.0cm	pT1N0M0，IA期	0/7	2	2017.4.19 左BCT+SLNB；TC*4；放疗*27次 他莫昔芬*5年	无	父亲肝癌（去世）	无（2020.09.14）
53	19B3187766	李梅	PMS1	c.287C>G	p.Ala96Gly	Missense	意义未明突变	00894269	1975.11	43	女	汉	安徽宿州	18038093803	GXPX	2019.06.09	深圳	IDC	0.8	0.8	3+	0.2	Luminal B Her-2阳性型	1.0cm	pT1N0M0，IA	0/4	2	2019.7.3 右BCT+SLNB TCH*6；靶向治疗（H）一年	无	姨妈60岁乳腺癌	无（2021.07.23）
149	21B17241668	朱延丹	CDK12	c.3760+12G>A	—	Splice	意义未明变异	01022650	1980.08	41	女	汉	广东河源	13510906171	GXP0	2021.07.24	深圳	IDC	0.9	0.9	—	0.1	Luminal A	1.0cm	pT1N0M0，IA	0/6	1	2021.08.20 左BCT+SLNB；放疗*15；化疗不详	2021.08.31 宫颈CIN III	无	无（2021.12.13）
165	19B3002302	黄梦瑶	MUTYH	c.934-2A>G	—	SpliceAcce ptor	意义未明变异	00805500	1991.12	29	女	汉	湖北潜江	13189041887	GXP0	2021.08.21	深圳	IDC	0.95	0.9	—	0.1	Luminal A	1.0cm	pT1N0M0，IA	0/4	2	2021.09.24 左BCT+SLNB；TC*4,	无	无	时间过短
178	21B17241701	李燕燕	—	—	—	—	—	01042624	1982.08	39	女	汉	山东聊城	15218736010	GXPX	2021.11.19	深圳	IDC	0.9	0.9	1+	0.05	Luminal A	1.0cm	pT1N0M0，IA	0/3	1	2021.12.6 右BCT+SLNB；TC*4	无	无	时间过短
207	20B2446955	童艳	BLM	c.2515A>G	p.Lys839Glu	Missense	意义未明突变	00745330	1985.09	31	女	汉	广东龙川	13923457851	GXP0	2017.03.22	深圳	IDC	0.8	0.8	—	0.1	Luminal A	1.0cm	pT1N0M0，IA期	0/4	1	2017.4.5 右全切+SLNB；TC*4；他莫昔芬*5年	无	姑姑脑癌	无（2020.03.09）
40	18B4144418	卓丽宏	ATM	c.6503C>T	p.Ser2168Leu	Missense	意义未明突变	00852634	1974.01	44	女	汉	广东惠州	13622309333	GXP1	2018.10.15	深圳	IDC	0.9	0.9	—	0.05	Luminal A	0.9cm	pT1N0M0，IA	0/8	2	2018.11.7 右全切+SLNB；TC*4；内分泌*5年	无	无	无（2020.05.20）
50	19B3187769	肖雪莲	BRIP1	c.2324A>G	p.Asn775Ser	Missense	意义未明突变	00799682	1974.09	43	女	汉	广东韶关	13714148479	GXP1	2017.11.14	深圳	IDC	—	—	—	0.6	TNBC	0.8cm	pT1N0M0，IA	0/5	3	2017.12.27 右全切+SLNB；EC*4→T*4	无	姐姐19岁脑髓体瘤	无（2021.04.21）
201	18B3976326	熊晖	MUTYH	c.608G>C	p.Arg203Pro	Missense	意义未明突变	00867251	1971.04	50	女	汉	广东河源	18139323330	GXP1	已绝经	深圳	IDC	0.8	0.7	1+	0.2	Luminal B Her-2阴	0.8cm	pT1N0M0,IA	0/4	3	2021.01.14 右BCT+SLNB；TC*4	无	无	无（2021.12.23）
15	17B0031999	梁彩萍	RAD51C		c.1109G>A	p.Arg370Gln	意义未明突变	00758120	1982.04	34	女	汉	广东新兴	13699885936	GXP2	2017.02.28	深圳	IDC	0.9	0.9	—	0.05	Luminal A	0.7cm	pT1N1M0，IIA期	2/18	2	2017.4.10 右BCT+ALN；EC*4→T*4；放疗；内分泌治疗	无	无	无（2021.03.18）
91	19B3002287	张金穗	MLH1	c.117-10G>A	—	Splice	意义未明突变	00935589	1979.06	40	女	汉	广东揭阳	13902926291	GXP2	2020.03.13	深圳	腺样囊性癌	—	—	—	0.2	TNBC	0.7cm	pT1N0M0，IA	0/3	未知	2020.4.2 左全切+SLNB；TC*4	无	无	无（2021.05.20）
122	19B3187967	高筠燕	—	—	—	—	—	00848281	1963.09	55	女	汉	江苏南通	13912217828	GXPX	51岁绝经	深圳	IDC	—	—	3+	0.2	Her-2 阳性型	0.7cm	pT1N0M0，IA	0/7	3	2018.10.8 右BCT+SLNB；2018.10.24 EC*4→TH*4；放疗；曲妥珠单抗*1年；依西美坦*5年	2015 左乳癌行左MRM；CMF*6 来曲唑至今	无	无（2020.09.11）
77	19B3187757	张晓平	—	—	—	—	—	00923975	1955.07	64	女	汉	广东深圳	13602572577	GXPX	49岁绝经	深圳	DCIS	0.9	0.9	—	0.05	Luminal A	0.6cm	TisN0M0，0期	0/4	低级别	2019.12.27 右全切+SLNB；依西美坦*5年	无	母亲44岁乳腺癌	无（2021.06.23）
136	21B05019138	柏彦平	PMS1	c.966+6T>C	—	Splice	意义未明变 异	00989738	1975.04	45	女	汉	黑龙江鹤岗	13713896569	GXP1	2021.01,21	深圳	IDC	—	—	—	0.5	TNBC	0.6cm	cT2N1M0,IIB；ypT1N0M0；IA	0/22	3	2021.2.4 NAC:EC*4→T*4 q2w；2021.6.1 右MRM+扩张器；卡培他滨*1年；放疗	无	父亲肺癌
146	19B3002297	程遥	—	—	—	—	—	00452614	1968.04	53	女	汉	北京	13713875006	GXP1	2020.05.04	深圳	IDC	0.5	—	1+	0.1	Luminal B Her-2阴性	0.6cm	pT1N0M0，IA	0/5	1	2021.7.21 右BCT+SLNB；TC*4	无	姐姐49岁乳腺癌（BRCA+）；母亲49岁乳腺癌（BRCA+）；外婆乳腺癌
66	19B0199597	刘秋婵	—	—	—	—	—	00873141	1957.06	60	女	汉	广东河源	13828809102	GXPX	55岁绝经	深圳	IDC	—	—	—	0.25	TNBC	0.5cm	pT1N0M0，IA	0/6	2	2019.3.5 左全切+SLNB；TC*4	无	母亲68岁胰腺癌	无（2020.05.30）
160	21B17241681	张蓝丽	MLH1	c.1136A>C	p.Tyr379Ser	Missense	意义未明变异	01026192	1974.06	47	女	汉	广东深圳	13612833328	GXPX	2021.08.15	深圳	ILC	0.9	0.9	—	0.05	Luminal A	0.25cm	pT1N0M0，IA	0/3	低级别	2021.09.14 右BCT+SLNB，术后放疗+内分泌	右肺癌（新发）	无	时间过短
17	17B0052713	黄婵英	ATM		c.3963G>A	p.Met1321Ile	意义未明突变	00215499	1964.02	53	女	汉	广东饶平	15013815193	GXPX	已绝经	深圳	DCIS	—	—	3+	0.05	Her-2阳性型	0.12cm	pT1N0M0，IA期	0/4	2	2017.06.02 左全切+SLNB；PH*12（紫杉醇+卡铂）	35岁患右乳癌；42岁右乳癌复发	无	无（2020.09.21）
142	21B05019132	詹晓瑜	BRCA2	c.2122T>A	p.Ser708Thr	Missense	意义未明变 异	00734285	1982.03	39	女	汉	广东潮州	13828783977	GXP2	2021.06.22	深圳	LCIS	0.95	4	未知	未知	未知	——	pTisN0M0，0期	—	未知	2021.7.6 行右乳肿物扩大切除术	无	无
143	21B05019131	陈慕焕	—	—	—	—	—	01016041	1992.09	28	女	汉	广东汕尾	15099769165	GXP0	2021.06.21	深圳	DCIS	未知	未知	未知	未知	未知	——	——	——	低级别	拒绝手术及治疗	无	无
3	17B0014396	黄婷	—	—	—	—	—	00474057	1985.01	31	女	汉	广东深圳	13570809051	GXP1	2016.12.28	深圳	DCIS	—	—	3+	0.5	Her-2阳性型	—	pTisN0M0，0期	0		2017.2.6 左全切+SLNB+扩张器	2020.06.24 双侧甲状腺乳头状癌 pT1N1M0，IB期	无	无（2021.01.22）
97	20B2446950	文海燕	PALB2	c.2586+20C>G	—	Splice	意义未明突变	00946375	1974.01	45	女	汉	广东惠州	18922808628	GXP1	2020.07.04	深圳	导管内乳头状癌	0.9	0.9	未知	未知	未知	—	TisN0M0，0期	未做	低级别	2020.7.16 双乳区段切除；后外院行左全切	无	母亲45岁乳腺癌；姨妈46岁乳腺癌	无（2021.08.02）
123	19B3187970	黄伟珊	ACVRL1	c.77C>T	p.Pro26Leu	Missense	意义未明变异	00718161	1971.01	49	女	汉	广东惠州	13502818826	GXPX	未知	深圳	DCIS	—	0.01	3+	0.2	Luminal B Her-2阳性	—	TisN0M0，0期	0/3	高级别	2021.1.8 右全切+SLNB	2016.8.2 左乳癌行全切+SLNB；免疫组化同右乳癌	无	无（2021.05.13）
20	17B0087287	李慧雯	CHEK2		c.445-9C>G		意义未明突变	00769533	1991.03	26	女	汉	广东深圳	13510202626	GXP0	2017.05.22	深圳	DCIS	0.4	0.3	—	0.02	Luminal A		pTisN0M0，0期	0/2	低级别	2017.06.22 左BCT	无	无	无（2021.03.22）
173	21B17241695	肖敬	CHEK2	c.246_260del CCAAGAACC TGAGGA	p.Asp82_Glu86del	Deletion	意义未明变异	01037479	1983.11	37	女	汉	湖南岳阳	13686458112	GXP2	2021.11.10	深圳	IDC	—	0.05	3+	0.4	Luminal B Her-2 阳性型		cT3-4cN2M0 III期	还未手术	还未手术	2021.11.10 NAC:TCbHP*6；还未手术	无	无	时间过短
184	19B3187787	丁永纯	—	—	—	—	—	00480770	1985.06	36	女	汉	四川南充	18927424245	GXPX	2021.11.23	深圳	右IDC	0.8	0.9	1+	0.2	Luminal B Her-2阴		pT1N2M0，IIIA	5/21	2	2021.12.10 右MRM；EC	无	无	时间过短
209	21B17241709	崔秋燕	PALB2	c.3059A＞G	p.Gln1020Arg	Missense	意义未明变异	01048890	1989.08	32	女	汉	广东茂名	13828856918	GXP2	2021.12.19	深圳	IDC	0.9	0.3	1+	0.6	Luminal B Her-2阴		cT2N0M0 IIA	还未手术	2	还未手术	无	无	时间过短
